# Supplementary material for: Modulating the frontier orbitals of L(X)Ga-substituted diphosphenes [L(X)GaP]2 (X = Cl, Br) and their facile oxidation to radical cations
Source: PubMed Central journal article supplement — Chem Sci. 2022 Oct 12;13(43):12643–50. doi: 10.1039/d2sc04207j (PMC9645402; doi:10.1039/d2sc04207j), 2022-10-12
Supplement: SC-013-D2SC04207J-s001.pdf [file SC-013-D2SC04207J-s001.pdf]

## Supporting Information

## **Content:**

### **1. Experimental Section**

#### **2. NMR and IR Characterization**

**Figure S1-S4.**  $^1\text{H}$ ,  $^{13}\text{C}$ ,  $^{31}\text{P}$  NMR and IR spectra of **2a**.

**Figure S5-S8.**  $^1\text{H}$ ,  $^{13}\text{C}$ ,  $^{31}\text{P}$  NMR and IR spectra of **2b**.

**Figure S9-S12.**  $^1\text{H}$ ,  $^{13}\text{C}$ ,  $^{31}\text{P}$  NMR and IR spectra of **3a**.

**Figure S13-S16.**  $^1\text{H}$ ,  $^{13}\text{C}$ ,  $^{31}\text{P}$  NMR and IR spectra of **3b**.

**Figure S17-S18.** IR spectra of **4a**, and **4b**.

**Figure S19-S23.**  $^1\text{H}$ ,  $^{13}\text{C}$ ,  $^{31}\text{P}$  NMR and IR spectra of **5a**.

**Figure S24-S28.**  $^1\text{H}$ ,  $^{13}\text{C}$ ,  $^{31}\text{P}$  NMR and IR spectra of **5b**.

#### **3. Cyclic Voltammetry**

**Figure S29-S32.** CV spectra of **2a**, **2b**, **3a**, and **3b**.

#### **4. X-Ray Crystallographic Analysis**

**Table S1–S3.** Crystal data and structure refinement parameters of **2–5**.

**Figure S33-S40.** Molecular structures of **2–5**.

#### **5. Computational Details**

**Table S4–S6.** Selected calculated bond lengths, bond orders, and NPA charges of **2–4**.

**Table S7–S8.** Calculated  $g$ -factors, coupling constants and spin densities of **2–4**.

**Figure S41-S46.** Selected molecular orbitals of **2–4**.

#### **6. EPR Spectroscopy**

**Figure S47.** Stacked X-, Q, and W-band EPR spectra of **4a**.

#### **7. References**

## 1. Experimental Section

**General procedure.** All experiments and manipulations were carried out under a dry argon atmosphere using either standard *Schlenk* techniques or an MBraun LABmaster Pro glovebox. Toluene, benzene, fluorene, and *n*-hexane were dried using Braun solvent drying system, degassed, and stored over 4Å molecular sieve. Toluene-*d*<sub>8</sub>, benzene-*d*<sub>6</sub>, and THF-*d*<sub>8</sub> were dried by refluxing over NaK, distilled prior to use, and stored over 4Å molecular sieve. Commercial reagents were purchased from Aldrich, Acros, or Alfa-Aesar Chemical Co. and used as received. L(Cl)GaPCO (L = HC[C(Me)N(Ar)]<sub>2</sub>, Ar = 2,6-*i*Pr<sub>2</sub>C<sub>6</sub>H<sub>3</sub>),<sup>1</sup> IMe<sub>4</sub>,<sup>2</sup> and Fc[B(C<sub>6</sub>F<sub>5</sub>)<sub>4</sub>]<sup>3</sup> were prepared according to literature procedures. NMR spectra (<sup>1</sup>H, <sup>13</sup>C, <sup>31</sup>P) were recorded on Bruker Avance II 500 MHz spectrometer and were referenced to internal C<sub>6</sub>D<sub>5</sub>H (<sup>1</sup>H δ = 7.16; <sup>13</sup>C δ = 128.06), C<sub>7</sub>D<sub>7</sub>H (<sup>1</sup>H δ = 2.08, 6.97, 7.01, 7.09; <sup>13</sup>C δ = 137.19, 129.26, 127.96, 125.96), and THF-*d*<sub>8</sub> (<sup>1</sup>H δ = 1.72, 3.58; <sup>13</sup>C δ = 67.21, 25.31). <sup>31</sup>P NMR spectra are referenced to internal C<sub>6</sub>D<sub>5</sub>H (<sup>1</sup>H δ = 7.16), C<sub>7</sub>D<sub>7</sub>H (<sup>1</sup>H δ = 2.08, 6.97, 7.01, 7.09), and THF-*d*<sub>8</sub> (<sup>1</sup>H δ = 1.72, 3.58) using chi-values (χ).<sup>4</sup> Elemental analyses were performed at the *Elementaranalyse Labor* of the University of Duisburg-Essen. IR spectra were recorded by a Bruker ALPHA-T FT-IR spectrometer equipped with a single-reflection ATR sampling module. Melting points were measured in sealed glass capillaries. Cyclic voltammetry studies were performed in a glovebox using a Metrohm Autolab PGSTAT 204 potentiostat with a three electrodes setup consisting of a Pt disc (d ¼ 1 mm) working electrode, Pt wire counter electrode, and Ag wire pseudoreference electrode, and ferrocene as internal standard. Positive feedback compensation was utilized to reduce solvent resistance effects.

### Synthesis of [L(Cl)GaP]<sub>2</sub> (2a)

A toluene (10 mL) solution of L(Cl)GaPCO **1** (2.0 g, 3.44 mmol) was irradiated for 5 hours and the resulting green solid was collected by filtration, washed with toluene (2 mL) and dried. Yield: 65% (1.23 g). M.p. 120 °C (dec.). Single crystals suitable for X-ray diffraction were grown by cooling a hot toluene solution of **2a** to ambient temperature. Anal. calcd. (%) for C<sub>58</sub>H<sub>82</sub>Cl<sub>2</sub>Ga<sub>2</sub>N<sub>4</sub>P<sub>2</sub> (1104.39): C, 62.89; H, 7.46; N, 5.06. Found: C, 62.83; H, 7.52; N, 5.11. <sup>1</sup>H NMR (500 MHz, C<sub>7</sub>D<sub>8</sub>, 298 K) δ = 0.99 (d, <sup>3</sup>J<sub>HH</sub> = 6.7 Hz, 6H, CH(CH<sub>3</sub>)<sub>2</sub>), 1.13 (d, <sup>3</sup>J<sub>HH</sub> = 6.8 Hz, 6H, CH(CH<sub>3</sub>)<sub>2</sub>), 1.19 (t, <sup>3</sup>J<sub>HH</sub> = 7.2 Hz, 12H, CH(CH<sub>3</sub>)<sub>2</sub>), 1.64 (s, 6H, CCH<sub>3</sub>), 3.04 (sept, <sup>3</sup>J<sub>HH</sub> = 6.8 Hz, 2H, CH(CH<sub>3</sub>)<sub>2</sub>), 3.74 (sept, <sup>3</sup>J<sub>HH</sub> = 6.7 Hz, 2H, CH(CH<sub>3</sub>)<sub>2</sub>), 4.93 (s, 1H, CH), 6.90-7.10 (m, 6H, C<sub>6</sub>H<sub>3</sub>). <sup>13</sup>C{<sup>1</sup>H} NMR (125 MHz, C<sub>7</sub>D<sub>8</sub>, 298 K) δ = 23.1, 23.7, 24.1, 24.5 (CH(CH<sub>3</sub>)<sub>2</sub>), 27.1, 27.6, 28.6, 29.3 (CH(CH<sub>3</sub>)<sub>2</sub>), 97.0 (CH), 140.3, 142.7, 145.6, 168.9 (C<sub>6</sub>H<sub>3</sub>). <sup>31</sup>P{<sup>1</sup>H} (202 MHz, C<sub>7</sub>D<sub>8</sub>, 298 K) δ = 761.6 ppm. ATR-IR: ν 2957, 2908, 2851, 1552, 1454, 1432, 1379, 1309, 1256, 1170, 1013, 931, 863, 788, 774, 749, 632, 608, 525 cm<sup>-1</sup>.

### Synthesis of [L(Br)GaP]<sub>2</sub> (2b)

TMSBr (2 mL, 13.54 mmol) was added to a solid sample of **2a** (1.0 g, 0.902 mmol) at ambient temperature and stirred overnight. All volatiles were then removed in *vacuo* and the green residue was washed with toluene (1 mL). Yield: 99% (1.06 g). Single crystals suitable for X-ray diffraction were grown by cooling a

hot toluene solution of **2b** to ambient temperature. M.p. 123 °C (dec.). Anal. calcd. (%) for  $C_{58}H_{82}Br_2Ga_2N_4P_2$  (1192.29): C, 58.22; H, 6.91; N, 4.68. Found: C, 58.33; H, 7.05; N, 4.79.  $^1H$  NMR (500 MHz,  $C_7D_8$ , 298 K)  $\delta$  = 0.99 (d,  $^3J_{HH}$  = 6.5 Hz, 6H,  $CH(CH_3)_2$ ), 1.13 (d,  $^3J_{HH}$  = 6.6 Hz, 6H,  $CH(CH_3)_2$ ), 1.22 (d,  $^3J_{HH}$  = 6.8 Hz, 6H,  $CH(CH_3)_2$ ), 1.26 (d,  $^3J_{HH}$  = 6.6 Hz, 6H,  $CH(CH_3)_2$ ), 1.63 (s, 6H,  $CCH_3$ ), 3.00 (sept,  $^3J_{HH}$  = 6.8 Hz, 2H,  $CH(CH_3)_2$ ), 3.68 (sept,  $^3J_{HH}$  = 6.8 Hz, 2H,  $CH(CH_3)_2$ ), 4.86 (s, 1H,  $CH$ ), 6.90-7.08 (m, 6H,  $C_6H_3$ ).  $^{13}C\{^1H\}$  NMR (125 MHz,  $C_7D_8$ , 298 K)  $\delta$  = 23.6, 24.2, 24.7, 25.0 ( $CH(CH_3)_2$ ), 27.7, 28.2, 29.8 ( $CH(CH_3)_2$ ), 97.6 ( $CH$ ), 140.8, 143.3, 146.2, 169.5 ( $C_6H_3$ ).  $^{31}P\{^1H\}$  (202 MHz,  $C_7D_8$ , 298 K)  $\delta$  = 766.8. ATR-IR:  $\nu$  2967, 2919, 2859, 1558, 1519, 1459, 1436, 1384, 1311, 1258, 1173, 1101, 1015, 935, 867, 791, 774, 754, 710, 633, 527  $cm^{-1}$ .

### Synthesis of $[L(Cl)GaP]_2[IMe_4]$ (**3a**)

To a toluene (10 mL) suspension of **2a** (100 mg, 0.09 mmol),  $IMe_4$  (11 mg, 0.09 mmol) was added at ambient temperature. The initial green suspension immediately dissolved and a dark red solution formed. It was then filtered over celite and dried in *vacuo*. It was washed with *n*-hexane (2 mL), and dried to yield a red crystalline powder. Single crystals suitable for X-ray diffraction were grown by diffusing *n*-hexane to a saturated toluene solution of **3a** at ambient temperature. Yield: 95% (105 mg). M.p. 141 °C (dec.). Anal. calcd. (%) for  $C_{65}H_{94}Cl_2Ga_2N_6P_2$  (1228.49): C, 63.38; H, 7.69; N, 6.82. Found: C, 63.42; H, 7.73; N, 6.87.  $^1H$  NMR (500 MHz,  $C_7D_8$ , 298 K)  $\delta$  = 0.45 (d,  $^3J_{HH}$  = 6.4 Hz, 3H,  $CH(CH_3)_2$ ), 0.69 (d,  $^3J_{HH}$  = 6.4 Hz, 3H,  $CH(CH_3)_2$ ), 0.92 (t,  $^3J_{HH}$  = 7.1 Hz, 3H,  $CH(CH_3)_2$ ), 1.05 (d,  $^3J_{HH}$  = 6.8 Hz, 3H,  $CH(CH_3)_2$ ), 1.09 (d,  $^3J_{HH}$  = 6.7 Hz, 3H,  $CH(CH_3)_2$ ), 1.12 (d,  $^3J_{HH}$  = 6.7 Hz, 3H,  $CH(CH_3)_2$ ), 1.16-1.28 (m, 12H,  $CH(CH_3)_2$ ), 1.29 (t,  $^3J_{HH}$  = 6.5 Hz, 6H,  $CH(CH_3)_2$ ), 1.38-1.40 (m, 12H,  $CH(CH_3)_2$ ), 1.40 (s, 3H,  $CCH_3$ ), 1.42 (s, 3H,  $CCH_3$ ), 1.51 (s, 3H,  $CCH_3$ ), 1.53 (s, 3H,  $CCH_3$ ), 1.58 (s, 3H,  $CCH_3$ ), 1.61 (s, 3H,  $CCH_3$ ), 2.77 (s, 3H,  $NCH_3$ ), 3.06 (sept,  $^3J_{HH}$  = 6.7 Hz, 1H,  $CH(CH_3)_2$ ), 3.16 (sept,  $^3J_{HH}$  = 6.7 Hz, 1H,  $CH(CH_3)_2$ ), 3.23 (s, 3H,  $NCH_3$ ), 3.23 (sept,  $^3J_{HH}$  = 6.7 Hz, 1H,  $CH(CH_3)_2$ ), 3.29 (sept,  $^3J_{HH}$  = 6.7 Hz, 1H,  $CH(CH_3)_2$ ), 3.38 (sept,  $^3J_{HH}$  = 6.7 Hz, 1H,  $CH(CH_3)_2$ ), 3.58 (sept,  $^3J_{HH}$  = 6.7 Hz, 1H,  $CH(CH_3)_2$ ), 3.80 (sept,  $^3J_{HH}$  = 6.7 Hz, 1H,  $CH(CH_3)_2$ ), 3.95 (sept,  $^3J_{HH}$  = 6.7 Hz, 1H,  $CH(CH_3)_2$ ), 4.87 (s, 1H,  $CH$ ), 4.88 (s, 1H,  $CH$ ), 6.86 (d,  $^3J_{HH}$  = 7.8 Hz, 1H,  $C_6H_3$ ), 7.05-7.08 (m, 2H,  $C_6H_3$ ), 7.10-7.15 (m, 5H,  $C_6H_3$ ), 7.18-7.23 (m, 2H,  $C_6H_3$ ), 7.26-7.32 (m, 2H,  $C_6H_3$ ).  $^{13}C\{^1H\}$  NMR (125 MHz,  $C_7D_8$ , 298 K)  $\delta$  = 7.8, 14.0 ( $NCH_3$ ), 22.7, 23.2, 23.5, 23.8, 23.9, 24.0, 24.2, 24.6, 24.7, 25.0, 25.3, 25.4, 25.6, 26.2, 26.3, 26.8, 27.2, 27.5, 27.7, 27.9 ( $CH(CH_3)_2$ ), 28.6, 29.1, 29.5, 29.9, 30.0, 31.7, 32.4, 32.6, 33.3, 33.5 ( $CH(CH_3)_2$ ), 96.5, 97.9 ( $CH$ ), 122.9, 123.3, 123.7, 123.9, 124.0, 124.1, 124.3, 125.0, 125.2, 125.3, 126.0, 127.0, 142.0, 143.2, 143.3, 143.5, 143.7, 144.0, 144.4, 145.0, 145.1, 145.3, 151.3, 152.5, 166.4, 166.8, 168.3, 168.8 ( $C_6H_3$ ).  $^{31}P\{^1H\}$  (202 MHz,  $C_7D_8$ , 298 K)  $\delta$  = -85.8 (d,  $^1J_{P-P}$  = 353.0 Hz), -258.5 (d,  $^1J_{P-P}$  = 353.0 Hz). ATR-IR:  $\nu$  2951, 2909, 2852, 1541, 1515, 1451, 1431, 1378, 1312, 1253, 1173, 1094, 1014, 934, 854, 792, 755, 724, 689, 635, 526  $cm^{-1}$ .

### Synthesis of $[L(Br)GaP]_2[IMe_4]$ (**3b**)

Compound **3b** was synthesized following the similar protocols used for **3a** using **2b** (100 mg, 0.084 mmol) and  $IMe_4$  (10 mg, 0.084 mmol). Single crystals suitable for X-ray diffraction were grown by diffusing *n*-

hexane to a saturated toluene solution of **3a** at ambient temperature. Yield: 92% (100 mg). M.p. 147 °C (dec.). Anal. calcd. (%) for C<sub>65</sub>H<sub>94</sub>Br<sub>2</sub>Ga<sub>2</sub>N<sub>6</sub>P<sub>2</sub> (1316.39): C, 59.11; H, 7.17; N, 6.36. Found: C, 59.15; H, 7.21; N, 6.39. <sup>1</sup>H NMR (500 MHz, C<sub>7</sub>D<sub>8</sub>, 298 K) δ = 0.42 (d, <sup>3</sup>J<sub>HH</sub> = 6.4 Hz, 3H, CH(CH<sub>3</sub>)<sub>2</sub>), 0.80 (d, <sup>3</sup>J<sub>HH</sub> = 6.4 Hz, 3H, CH(CH<sub>3</sub>)<sub>2</sub>), 0.89 (t, <sup>3</sup>J<sub>HH</sub> = 7.1 Hz, 3H, CH(CH<sub>3</sub>)<sub>2</sub>), 1.01 (d, <sup>3</sup>J<sub>HH</sub> = 6.8 Hz, 3H, CH(CH<sub>3</sub>)<sub>2</sub>), 1.06 (m, 6H, CH(CH<sub>3</sub>)<sub>2</sub>), 1.13 (d, <sup>3</sup>J<sub>HH</sub> = 6.8 Hz, 3H, CH(CH<sub>3</sub>)<sub>2</sub>), 1.15 (d, <sup>3</sup>J<sub>HH</sub> = 6.8 Hz, 6H, CH(CH<sub>3</sub>)<sub>2</sub>), 1.20 (d, <sup>3</sup>J<sub>HH</sub> = 6.6 Hz, 3H, CH(CH<sub>3</sub>)<sub>2</sub>), 1.21-1.24 (m, 6H, CH(CH<sub>3</sub>)<sub>2</sub>), 1.31 (d, <sup>3</sup>J<sub>HH</sub> = 6.8 Hz, 3H, CH(CH<sub>3</sub>)<sub>2</sub>), 1.34-1.36 (m, 6H, CH(CH<sub>3</sub>)<sub>2</sub>), 1.40 (s, 3H, CCH<sub>3</sub>), 1.42 (s, 3H, CCH<sub>3</sub>), 1.47 (s, 3H, CCH<sub>3</sub>), 1.50 (s, 3H, CCH<sub>3</sub>), 1.54 (s, 3H, CCH<sub>3</sub>), 1.59 (s, 3H, CCH<sub>3</sub>), 2.86 (s, 3H, NCH<sub>3</sub>), 3.04 (sept, <sup>3</sup>J<sub>HH</sub> = 6.7 Hz, 1H, CH(CH<sub>3</sub>)<sub>2</sub>), 3.12 (s, 3H, NCH<sub>3</sub>), 3.17 (sept, <sup>3</sup>J<sub>HH</sub> = 6.7 Hz, 1H, CH(CH<sub>3</sub>)<sub>2</sub>), 3.24 (sept, <sup>3</sup>J<sub>HH</sub> = 6.7 Hz, 2H, CH(CH<sub>3</sub>)<sub>2</sub>), 3.43 (sept, <sup>3</sup>J<sub>HH</sub> = 6.7 Hz, 1H, CH(CH<sub>3</sub>)<sub>2</sub>), 3.67 (sept, <sup>3</sup>J<sub>HH</sub> = 6.7 Hz, 1H, CH(CH<sub>3</sub>)<sub>2</sub>), 3.83 (sept, <sup>3</sup>J<sub>HH</sub> = 6.7 Hz, 1H, CH(CH<sub>3</sub>)<sub>2</sub>), 3.96 (sept, <sup>3</sup>J<sub>HH</sub> = 6.7 Hz, 1H, CH(CH<sub>3</sub>)<sub>2</sub>), 4.89 (s, 1H, CH), 4.91 (s, 1H, CH), 6.83 (d, <sup>3</sup>J<sub>HH</sub> = 7.5 Hz, 1H, C<sub>6</sub>H<sub>3</sub>), 7.02-7.05 (m, 2H, C<sub>6</sub>H<sub>3</sub>), 7.06-7.12 (m, 5H, C<sub>6</sub>H<sub>3</sub>), 7.14-7.18 (m, 2H, C<sub>6</sub>H<sub>3</sub>), 7.22-7.27 (m, 2H, C<sub>6</sub>H<sub>3</sub>). <sup>13</sup>C{<sup>1</sup>H} NMR (125 MHz, C<sub>7</sub>D<sub>8</sub>, 298 K) δ = 8.3, 14.3 (NCH<sub>3</sub>), 23.1, 23.6, 24.0, 24.3, 24.5, 24.6, 25.1, 25.2, 25.5, 25.6, 26.8, 27.1, 27.2, 27.5, 27.8, 28.0 (CH(CH<sub>3</sub>)<sub>2</sub>), 28.8, 29.0, 29.5, 29.9, 30.3, 32.0, 33.4, 33.9 (CH(CH<sub>3</sub>)<sub>2</sub>), 97.2, 98.7 (CH), 123.3, 123.6, 123.9, 124.2, 124.4, 124.5, 124.7, 125.4, 125.7, 126.4, 127.6, 142.3, 142.6, 143.4, 143.6, 143.9, 144.1, 144.4, 144.5, 145.0, 145.6, 145.7, 145.8, 151.6, 152.6, 167.0, 167.4, 169.0, 169.4 (C<sub>6</sub>H<sub>3</sub>). <sup>31</sup>P{<sup>1</sup>H} (202 MHz, C<sub>7</sub>D<sub>8</sub>, 298 K) δ = -77.7 (d, <sup>1</sup>J<sub>P-P</sub> = 358.9 Hz), -247.5 (d, <sup>1</sup>J<sub>P-P</sub> = 358.9 Hz). ATR-IR: ν 2945, 2908, 2855, 1544, 1518, 1454, 1431, 1378, 1312, 1252, 1172, 1096, 1014, 934, 854, 791, 755, 636, 531 cm<sup>-1</sup>.

#### Synthesis of {[L(Cl)GaP]<sub>2</sub>[IMe<sub>4</sub>]}[BAr<sup>F</sup><sub>4</sub>] (**4a**)

To a red toluene solution (5 mL) of **3a** (50 mg, 0.04 mmol), [FeCp<sub>2</sub>][BAr<sup>F</sup><sub>4</sub>] (35 mg, 0.04 mmol) was added at room temperature. Immediately the red solution turned light orange and **4a** was obtained as orange crystals in 83% isolated yield. Yield: 64 mg. M.p.: 100 °C (dec.). Anal. calcd. (%) for C<sub>89</sub>H<sub>94</sub>BCl<sub>2</sub>F<sub>20</sub>Ga<sub>2</sub>N<sub>6</sub>P<sub>2</sub> (1907.47): C, 55.94; H, 4.96; N, 4.40. Found: C, 56.05; H, 5.01; N, 4.47. ATR-IR: ν 2955, 2911, 2855, 1634, 1521, 1452, 1405, 1365, 1312, 1252, 1172, 1096, 1019, 976, 867, 797, 754, 661, 656 cm<sup>-1</sup>.

#### Synthesis of {[L(Br)GaP]<sub>2</sub>[IMe<sub>4</sub>]}[BAr<sup>F</sup><sub>4</sub>] (**4b**)

Compound **4b** was synthesized following the similar protocols used for **4a** using **3b** (50 mg, 0.038 mmol), [FeCp<sub>2</sub>][BAr<sup>F</sup><sub>4</sub>] (33 mg, 0.038 mmol). Single crystals suitable for X-ray diffraction were grown by storing a saturated toluene solution of **4b** at ambient temperature. Yield: 79% (60 mg, orange crystals). M.p.: 107 °C (dec.). Anal. calcd. (%) for C<sub>89</sub>H<sub>94</sub>BBBr<sub>2</sub>F<sub>20</sub>Ga<sub>2</sub>N<sub>6</sub>P<sub>2</sub> (1999.72): C, 53.46; H, 4.74; N, 4.20. Found: C, 53.54; H, 4.83; N, 4.31. ATR-IR: ν 2951, 2911, 2855, 1634, 1521, 1504, 1455, 1365, 1311, 1252, 1172, 1079, 1019, 974, 864, 797, 754, 681, 656 cm<sup>-1</sup>.

#### Synthesis of [L(Cl)GaP(IMe<sub>4</sub>)HPGa(Cl)L][BAr<sup>F</sup><sub>4</sub>] (**5a**)

HSn(*n*Bu)<sub>3</sub> (30 μL, 0.030 mmol; 1M solution in fluorobenzene) was added to a solution of **4a** (50 mg, 0.026 mmol) in fluorobenzene (5 mL) at ambient temperature. Upon addition the solution turned colourless. Then

the mixture was stirred for **5a** min and all the volatiles were removed in *vacuo*. The colourless residue was then washed with *n*-hexane (1 mL) and dried in *vacuo* to afford **5a** as a colourless crystalline powder. Yield 73% (36 mg). Single crystals suitable for an X-ray diffraction analysis were obtained by slow diffusion of *n*-hexane to a saturated fluorene solution of **5a** at ambient temperature. M.p.: 153 °C (dec.). Anal. calcd. (%) for C<sub>89</sub>H<sub>95</sub>BCl<sub>2</sub>F<sub>20</sub>Ga<sub>2</sub>N<sub>6</sub>P<sub>2</sub> (1908.48): C, 55.91; H, 5.01; N, 4.40. Found: C, 56.01; H, 5.12; N, 4.47. <sup>1</sup>H NMR (300 MHz, THF-*d*<sub>8</sub>, 298 K)  $\delta$  = 0.25 (d, <sup>3</sup>J<sub>HH</sub> = 6.3 Hz, 3H, CH(CH<sub>3</sub>)<sub>2</sub>), 0.45 (d, <sup>3</sup>J<sub>HH</sub> = 6.1 Hz, 3H, CH(CH<sub>3</sub>)<sub>2</sub>), 0.80 (d, <sup>3</sup>J<sub>HH</sub> = 6.6 Hz, 3H, CH(CH<sub>3</sub>)<sub>2</sub>), 0.92 (d, <sup>3</sup>J<sub>HH</sub> = 6.5 Hz, 3H, CH(CH<sub>3</sub>)<sub>2</sub>), 1.00–1.06 (m, 6H, CH(CH<sub>3</sub>)<sub>2</sub>), 1.08–1.12 (m, 9H, CH(CH<sub>3</sub>)<sub>2</sub>), 1.18–1.23 (m, 9H, CH(CH<sub>3</sub>)<sub>2</sub>), 1.28 (t, <sup>3</sup>J<sub>HH</sub> = 6.7 Hz, 6H, CH(CH<sub>3</sub>)<sub>2</sub>), 1.39 (t, <sup>3</sup>J<sub>HH</sub> = 6.6 Hz, 6H, CH(CH<sub>3</sub>)<sub>2</sub>), 1.69 (s, 3H, CCH<sub>3</sub>), 1.77 (s, 6H, CCH<sub>3</sub>), 1.81 (s, 3H, CCH<sub>3</sub>), 1.93 (s, 3H, CCH<sub>3</sub>), 1.97 (s, 3H, CCH<sub>3</sub>), 2.56 (s, 3H, NCH<sub>3</sub>), 2.72 (s, 3H, NCH<sub>3</sub>), 2.78 (sept, 2H, CH(CH<sub>3</sub>)<sub>2</sub>), 3.03 (sept, <sup>3</sup>J<sub>HH</sub> = 6.7 Hz, 2H, CH(CH<sub>3</sub>)<sub>2</sub>), 3.37 (sept, <sup>3</sup>J<sub>HH</sub> = 6.7 Hz, 1H, CH(CH<sub>3</sub>)<sub>2</sub>), 3.49 (sept, <sup>3</sup>J<sub>HH</sub> = 6.7 Hz, 1H, CH(CH<sub>3</sub>)<sub>2</sub>), 5.42 (s, 1H, CH), 5.45 (s, 1H, CH), 6.91 (d, <sup>3</sup>J<sub>HH</sub> = 6.8 Hz, 1H, C<sub>6</sub>H<sub>3</sub>), 7.10–7.17 (m, 2H, C<sub>6</sub>H<sub>3</sub>), 7.19–7.27 (m, 4H, C<sub>6</sub>H<sub>3</sub>), 7.31–7.40 (m, 4H, C<sub>6</sub>H<sub>3</sub>), 7.53 (t, <sup>3</sup>J<sub>HH</sub> = 7.6 Hz, 1H, C<sub>6</sub>H<sub>3</sub>). <sup>13</sup>C{<sup>1</sup>H} NMR (125 MHz, THF-*d*<sub>8</sub>, 298 K)  $\delta$  = 7.7, 8.6, 9.1, 23.9, 24.4 (CH(CH<sub>3</sub>)<sub>2</sub>), 28.3, 29.0, 29.3, 29.4, 30.3, 33.1 (CH(CH<sub>3</sub>)<sub>2</sub>), 98.8, 99.4 (CH), 115.9, 116.0 (NC), 125.0, 125.4, 126.0, 128.2, 128.8, 129.2, 131.0, 136.4, 138.0, 140.1, 145.4, 148.4, 150.0, 163.2, 164.7, 171.7, 171.9, 172.7 (C<sub>6</sub>H<sub>3</sub>). <sup>31</sup>P{<sup>1</sup>H} (121 MHz, THF-*d*<sub>8</sub>, 298 K)  $\delta$  = -148.8 (d, <sup>1</sup>J<sub>PP</sub> = 84.9 Hz), -229.1 (d, <sup>1</sup>J<sub>PP</sub> = 82.0 Hz). <sup>31</sup>P (121 MHz, THF-*d*<sub>8</sub>, 298 K)  $\delta$  = -147.5 (dd, <sup>1</sup>J<sub>PP</sub> = 25.3, 84.9 Hz), -228.0 (dd, <sup>1</sup>J<sub>PP</sub> = 85.6, 180.9 Hz). ATR-IR:  $\nu$  2964, 2926, 2867, 2156, 1640, 1510, 1456, 1371, 1258, 1178, 1082, 1021, 977, 941, 871, 800, 758, 684, 659, 604, 571, 533 cm<sup>-1</sup>.

### Synthesis of [L(Br)GaP(Ime<sub>4</sub>)HPGa(Br)L][BAR<sup>F</sup><sub>4</sub>] (**5b**)

Compound **5b** was synthesized following the similar protocols used for **5a** using **4b** (50 mg, 0.025 mmol), HSn(*n*Bu)<sub>3</sub> (30  $\mu$ L, 0.030 mmol; 1M solution in fluorobenzene). Yield: 70% (34 mg, colorless crystals). M.p.: 151 °C (dec.). Anal. calcd. (%) for C<sub>89</sub>H<sub>95</sub>BBr<sub>2</sub>F<sub>20</sub>Ga<sub>2</sub>N<sub>6</sub>P<sub>2</sub> (1996.37): C, 53.43; H, 4.79; N, 4.20. Found: C, 53.61; H, 4.96; N, 4.27. <sup>1</sup>H NMR (300 MHz, THF-*d*<sub>8</sub>, 298 K)  $\delta$  = 0.28 (d, <sup>3</sup>J<sub>HH</sub> = 6.0 Hz, 3H, CH(CH<sub>3</sub>)<sub>2</sub>), 0.48 (d, <sup>3</sup>J<sub>HH</sub> = 5.9 Hz, 3H, CH(CH<sub>3</sub>)<sub>2</sub>), 0.82 (d, <sup>3</sup>J<sub>HH</sub> = 6.2 Hz, 3H, CH(CH<sub>3</sub>)<sub>2</sub>), 0.93 (d, <sup>3</sup>J<sub>HH</sub> = 6.5 Hz, 3H, CH(CH<sub>3</sub>)<sub>2</sub>), 1.03 (t, <sup>3</sup>J<sub>HH</sub> = 6.1 Hz, 6H, CH(CH<sub>3</sub>)<sub>2</sub>), 1.11–1.19 (m, 9H, CH(CH<sub>3</sub>)<sub>2</sub>), 1.18–1.23 (m, 9H, CH(CH<sub>3</sub>)<sub>2</sub>), 1.28 (br, 6H, CH(CH<sub>3</sub>)<sub>2</sub>), 1.39 (t, <sup>3</sup>J<sub>HH</sub> = 6.5 Hz, 6H, CH(CH<sub>3</sub>)<sub>2</sub>), 1.69 (s, 3H, CCH<sub>3</sub>), 1.77 (s, 3H, CCH<sub>3</sub>), 1.78 (s, 3H, CCH<sub>3</sub>), 1.82 (s, 3H, CCH<sub>3</sub>), 1.94 (s, 3H, CCH<sub>3</sub>), 1.97 (s, 3H, CCH<sub>3</sub>), 2.51 (s, 3H, NCH<sub>3</sub>), 2.72 (s, 3H, NCH<sub>3</sub>), 2.86 (sept, 3H, CH(CH<sub>3</sub>)<sub>2</sub>), 3.09 (sept, <sup>3</sup>J<sub>HH</sub> = 6.7 Hz, 2H, CH(CH<sub>3</sub>)<sub>2</sub>), 3.41 (sept, <sup>3</sup>J<sub>HH</sub> = 6.7 Hz, 1H, CH(CH<sub>3</sub>)<sub>2</sub>), 5.41 (s, 1H, CH), 5.46 (s, 1H, CH), 6.89 (d, <sup>3</sup>J<sub>HH</sub> = 7.4 Hz, 1H, C<sub>6</sub>H<sub>3</sub>), 7.14–7.18 (m, 2H, C<sub>6</sub>H<sub>3</sub>), 7.27–7.33 (m, 4H, C<sub>6</sub>H<sub>3</sub>), 7.35–7.40 (m, 4H, C<sub>6</sub>H<sub>3</sub>), 7.54 (t, <sup>3</sup>J<sub>HH</sub> = 7.6 Hz, 1H, C<sub>6</sub>H<sub>3</sub>). <sup>13</sup>C{<sup>1</sup>H} NMR (125 MHz, THF-*d*<sub>8</sub>, 298 K)  $\delta$  = 8.8, 9.1, 24.1, 24.4 (CH(CH<sub>3</sub>)<sub>2</sub>), 27.4, 28.4, 28.7, 30.1, 30.4 (CH(CH<sub>3</sub>)<sub>2</sub>), 99.1, 99.7 (CH), 115.9, 116.0 (CN), 125.4, 125.6, 125.6, 125.9, 126.2, 126.4, 129.0, 129.2, 129.4, 129.7, 130.9, 136.4, 138.0, 138.4, 140.0, 140.4, 140.7, 141.1, 142.5, 144.1, 146.4, 148.5, 150.1, 163.1, 164.8, 171.2, 171.7, 172.0 (C<sub>6</sub>H<sub>3</sub>). <sup>31</sup>P{<sup>1</sup>H} (121 MHz, THF-*d*<sub>8</sub>, 298 K)  $\delta$  = -142.5 (d, <sup>1</sup>J<sub>PP</sub> = 87.9 Hz), -225.5 (d, <sup>1</sup>J<sub>PP</sub> = 87.2 Hz). <sup>31</sup>P (121 MHz, THF-*d*<sub>8</sub>, 298 K)  $\delta$  = -142.4 (dd, <sup>1</sup>J<sub>PP</sub> = 24.7, 87.9 Hz), -225.3 (dd, <sup>1</sup>J<sub>PP</sub> =

88.5, 181.1 Hz). ATR-IR:  $\nu$  2967, 2926, 2872, 2155, 1641, 1512, 1456, 1367, 1315, 1257, 1177, 1085, 1021, 979, 938, 870, 800, 757, 685, 658, 608, 571, 531  $\text{cm}^{-1}$ .

## 2. Spectroscopic Characterization

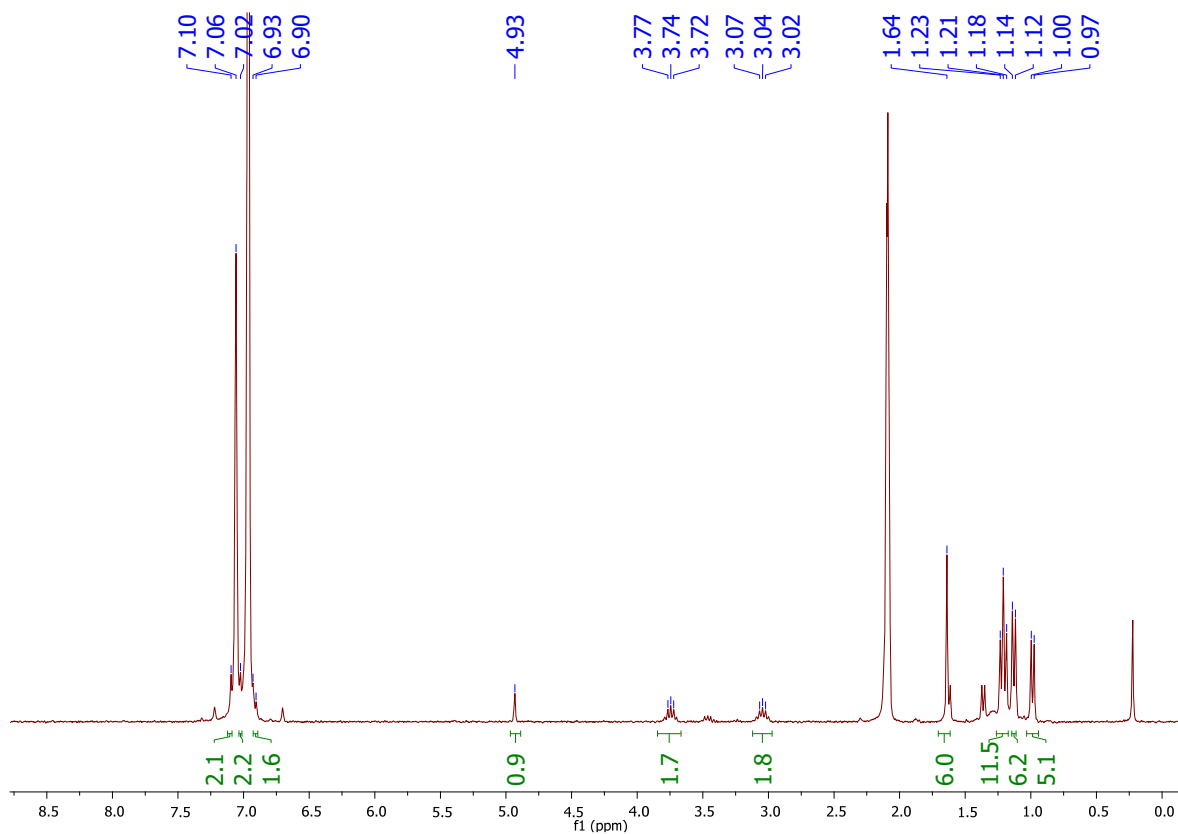

Figure S1.  $^1\text{H}$  NMR (500 MHz,  $\text{C}_7\text{D}_8$ , 298 K) spectrum of compound **2a**.

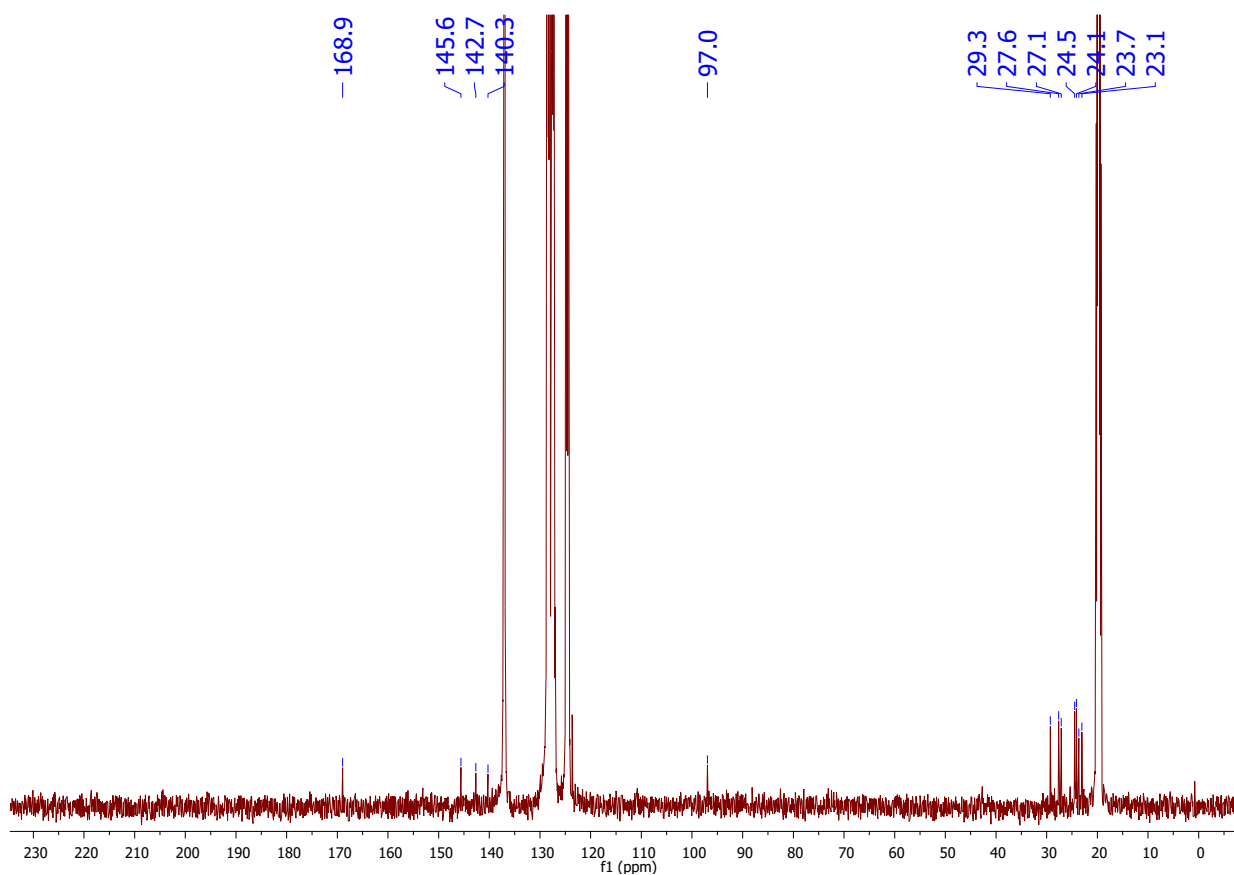

Figure S2.  $^{13}\text{C}\{^1\text{H}\}$  NMR (125 MHz,  $\text{C}_7\text{D}_8$ , 298 K) spectrum of compound **2a**.



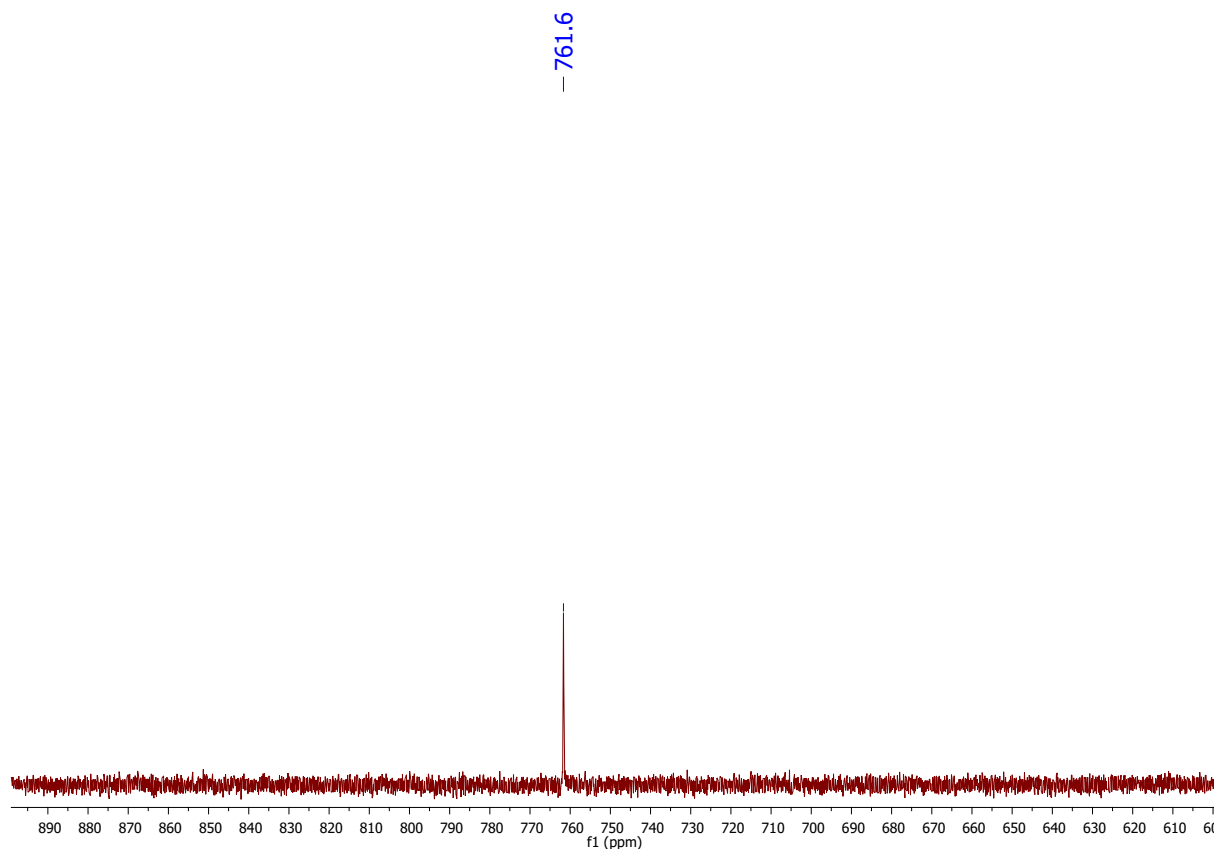

Figure S3.  $^{31}\text{P}\{^1\text{H}\}$  NMR (202 MHz,  $\text{C}_7\text{D}_8$ , 298 K) spectrum of compound **2a**.

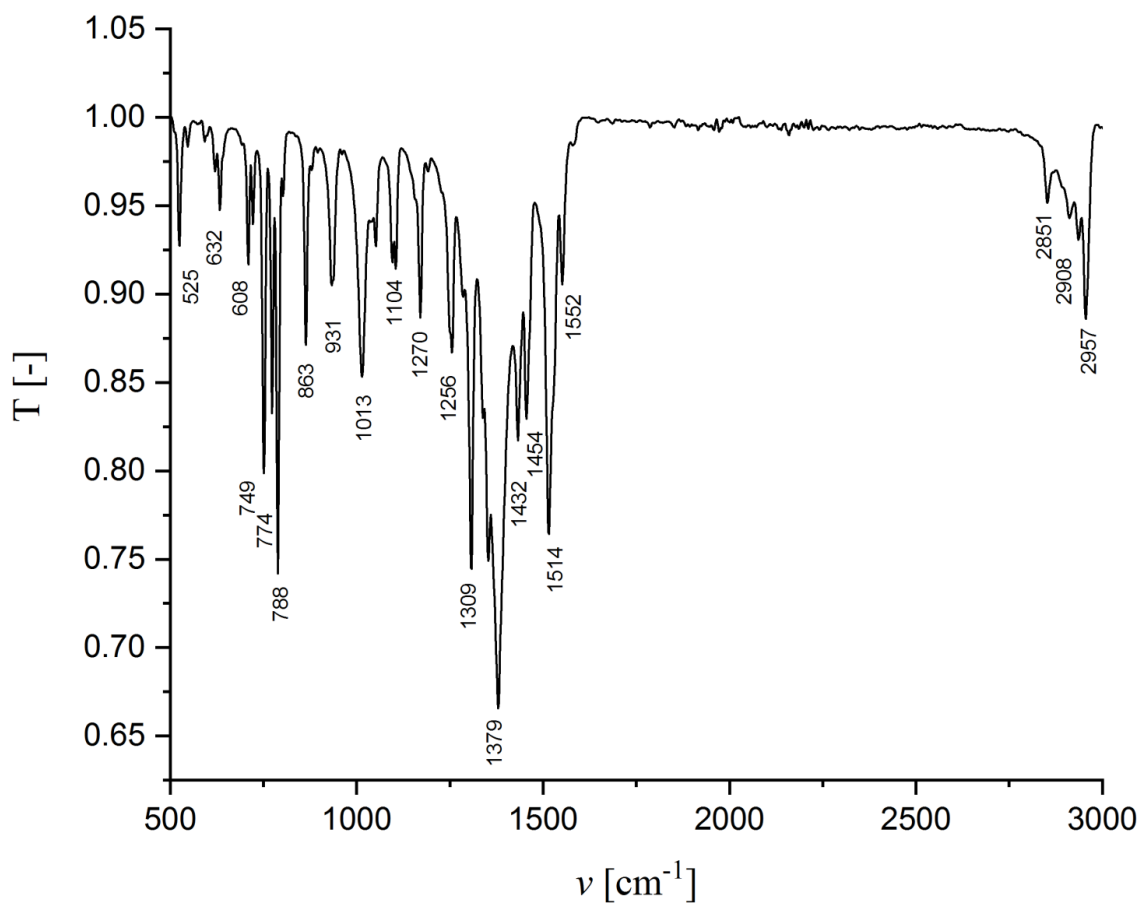

Figure S4. ATR-IR spectrum of **2a**.

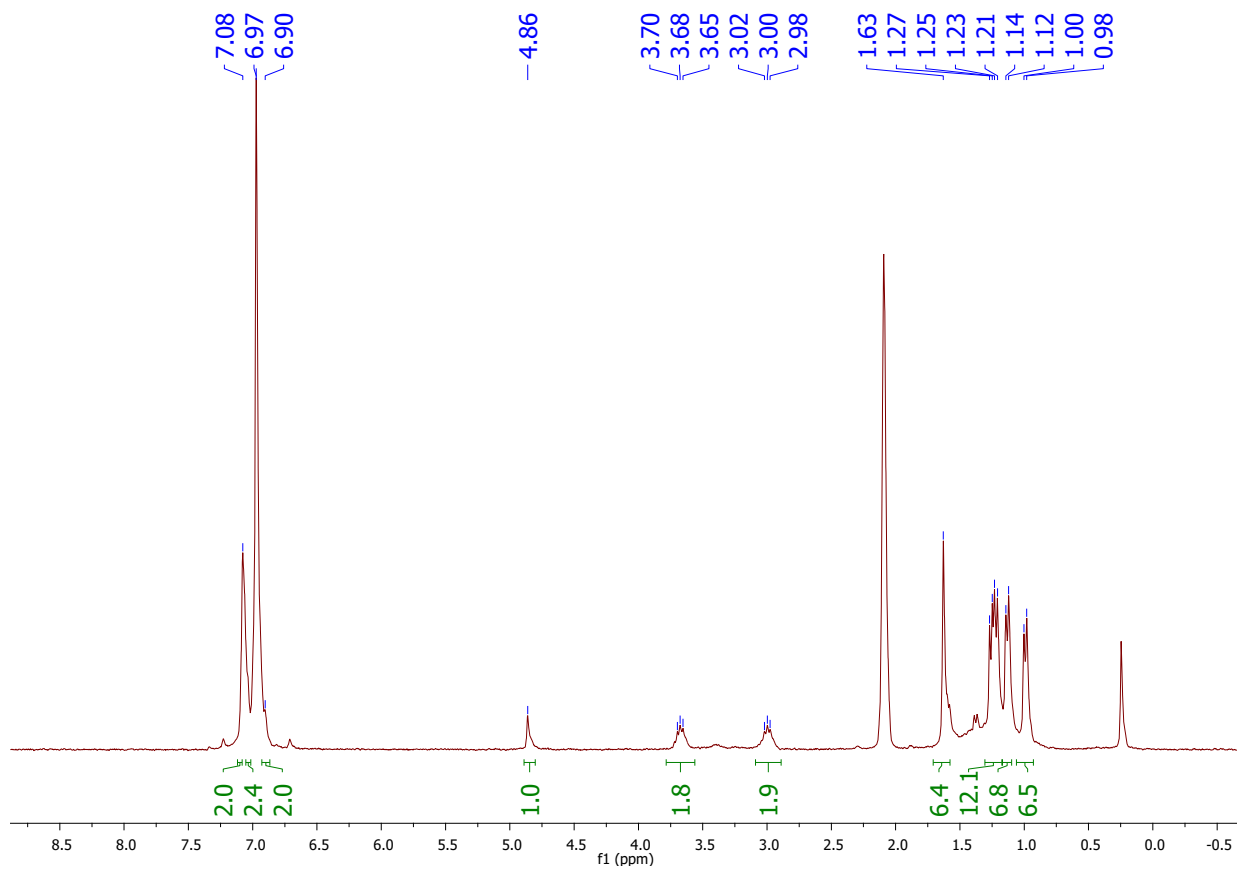

Figure S5.  $^1\text{H}$  NMR (500 MHz,  $\text{C}_7\text{D}_8$ , 298 K) spectrum of compound **2b**.

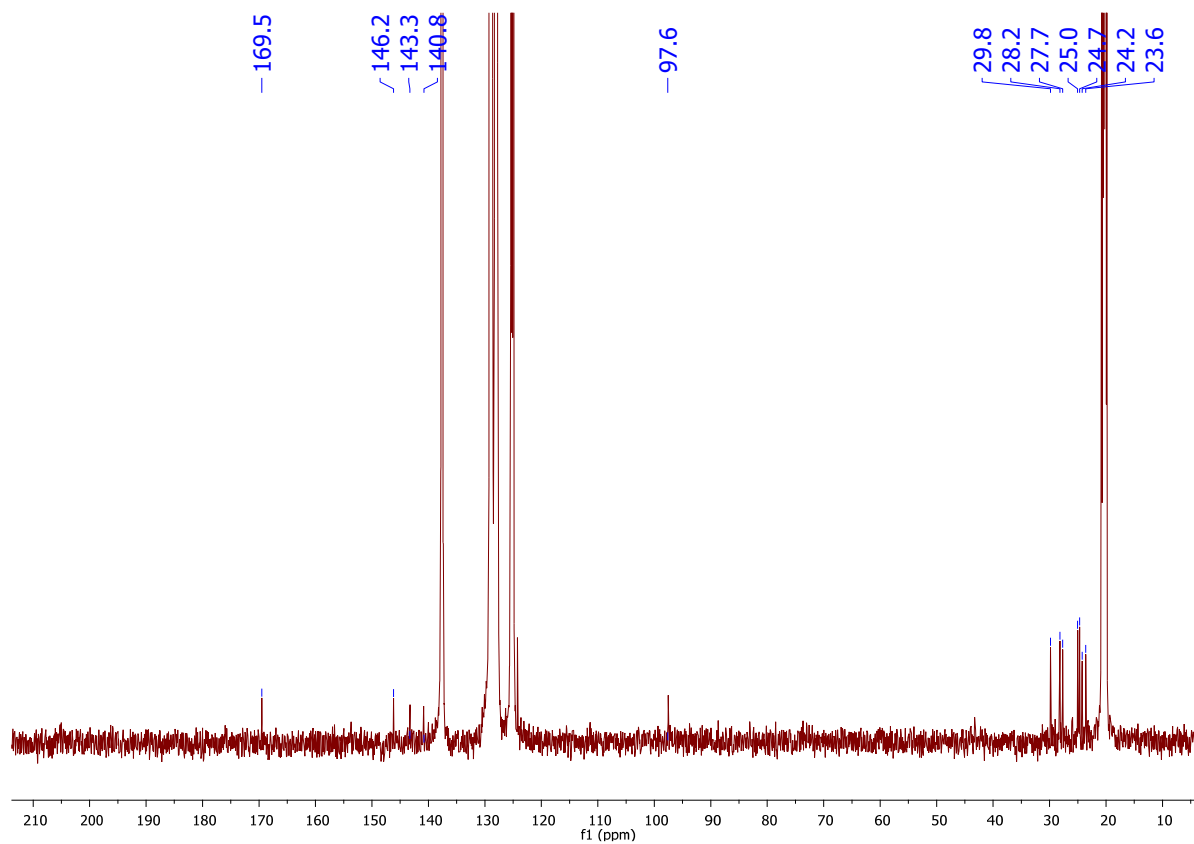

Figure S6.  $^{13}\text{C}\{^1\text{H}\}$  NMR (125 MHz,  $\text{C}_7\text{D}_8$ , 298 K) spectrum of compound **2b**.

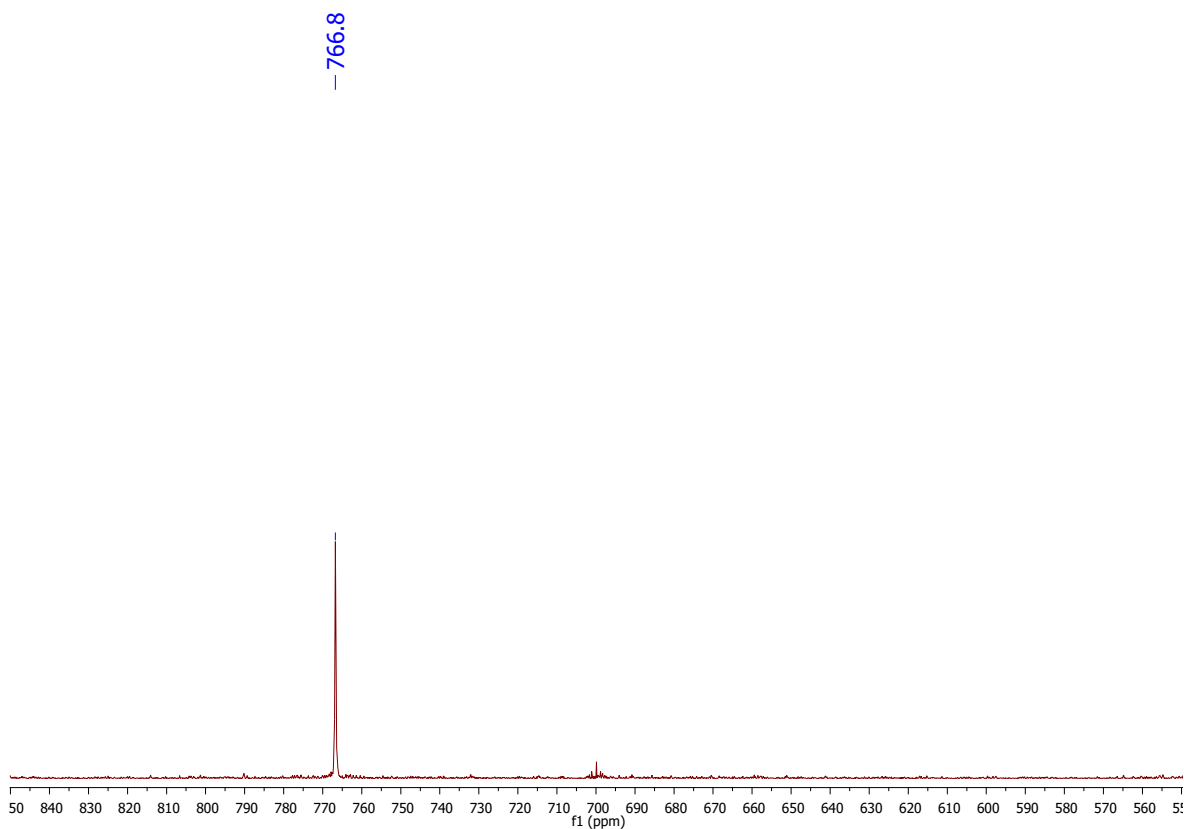

**Figure S7.**  $^{31}\text{P}\{^1\text{H}\}$  NMR (202 MHz,  $\text{C}_7\text{D}_8$ , 298 K) spectrum of compound **2b**.

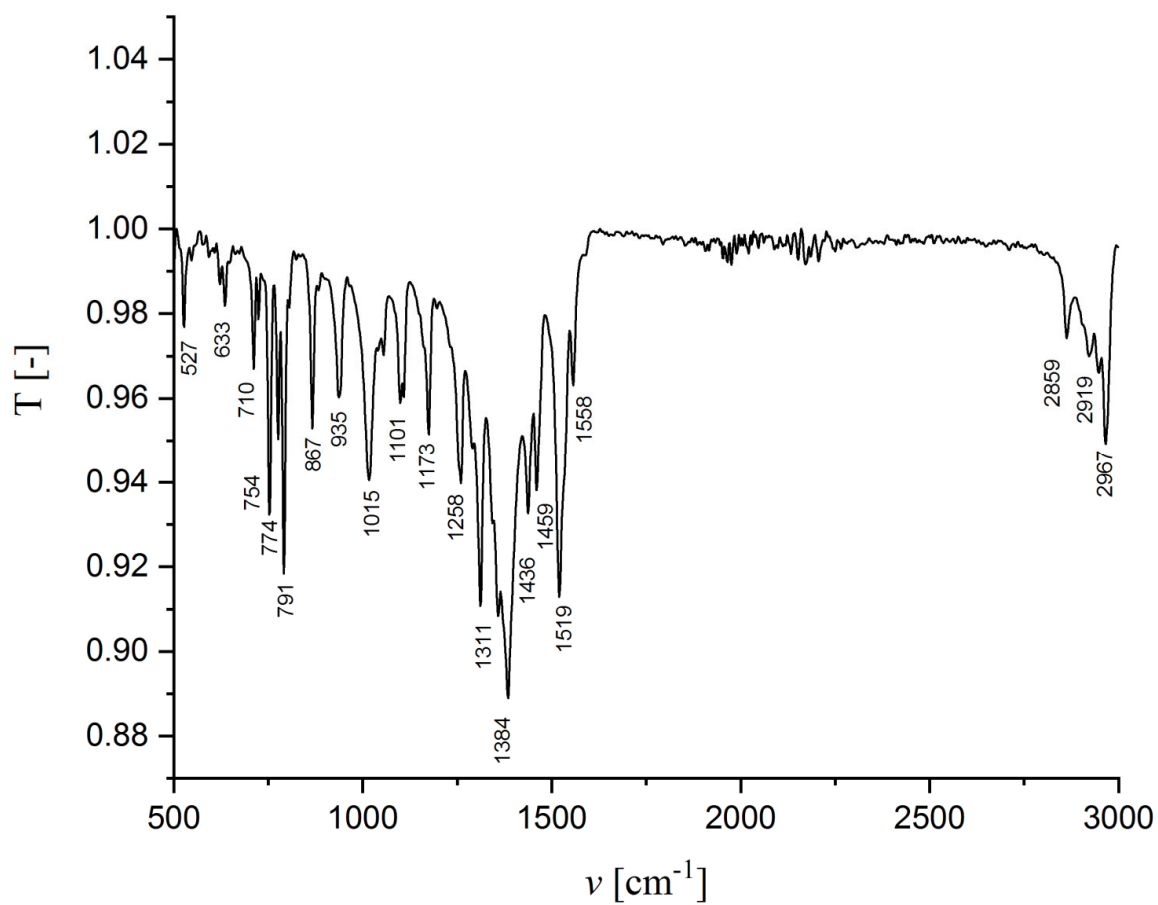

**Figure S8.** ATR-IR spectrum of **2b**.

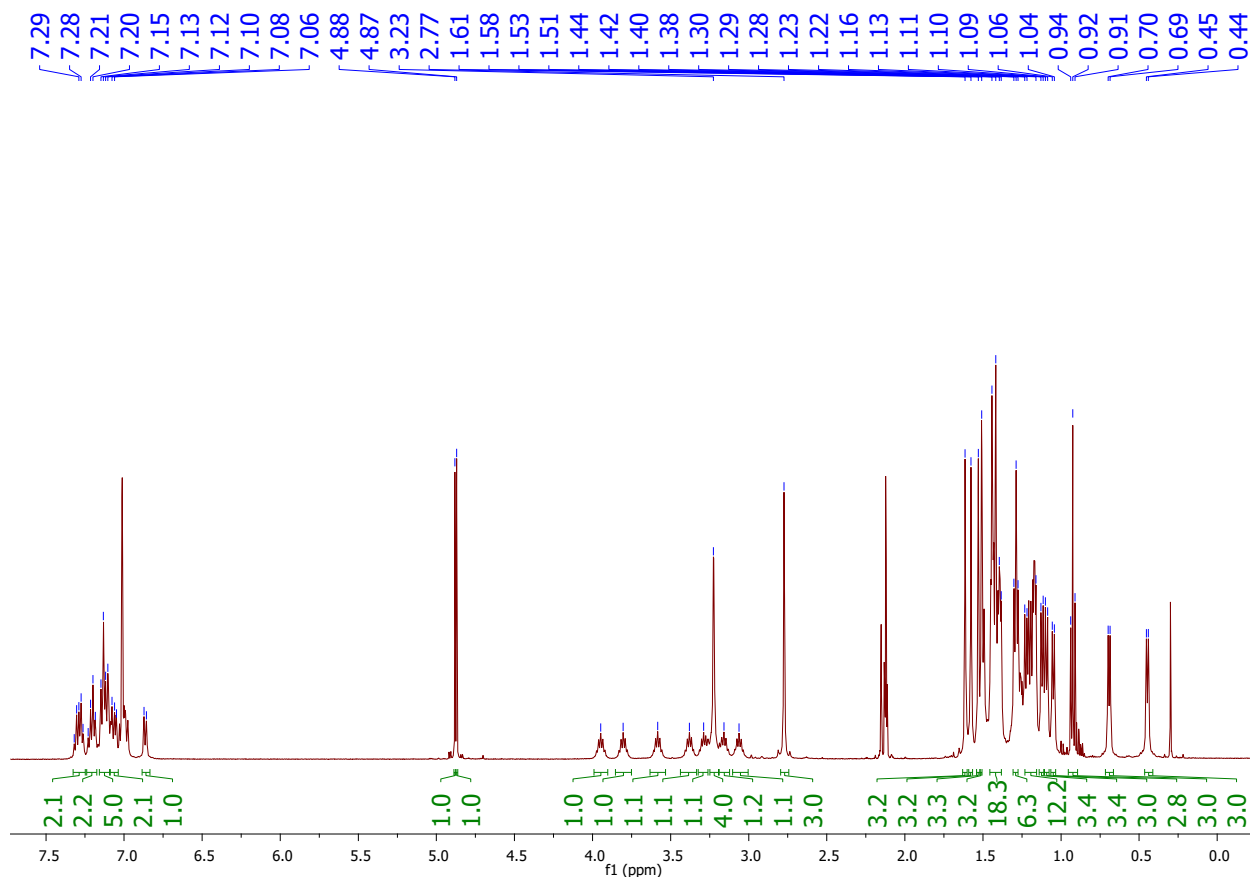

Figure S9.  $^1\text{H}$  NMR (300 MHz,  $\text{C}_7\text{D}_8$ , 298 K) spectrum of compound **3a**.

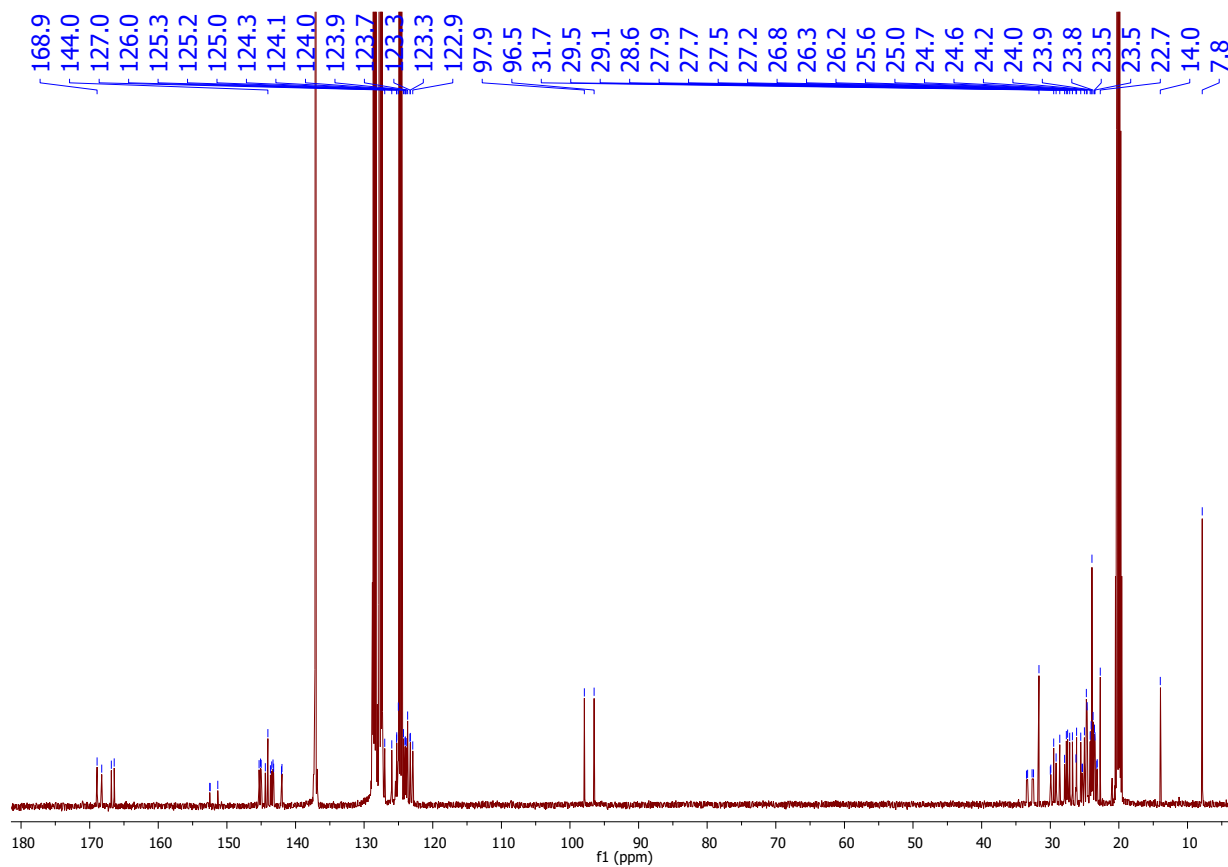

Figure S10.  $^{13}\text{C}\{^1\text{H}\}$  NMR (150 MHz,  $\text{C}_7\text{D}_8$ , 298 K) spectrum of compound **3a**.

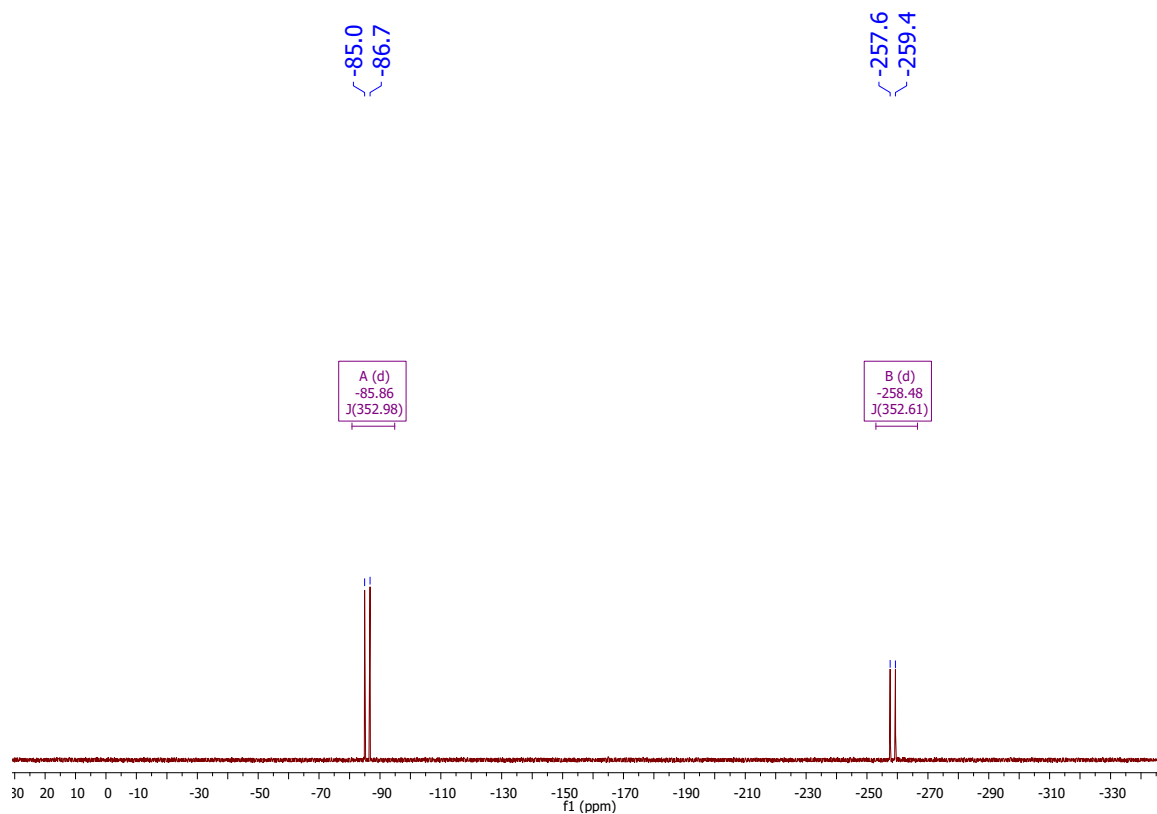

**Figure S11.**  $^{31}\text{P}\{^1\text{H}\}$  NMR (161 MHz,  $\text{C}_7\text{D}_8$ , 298 K) spectrum of compound **3a**.

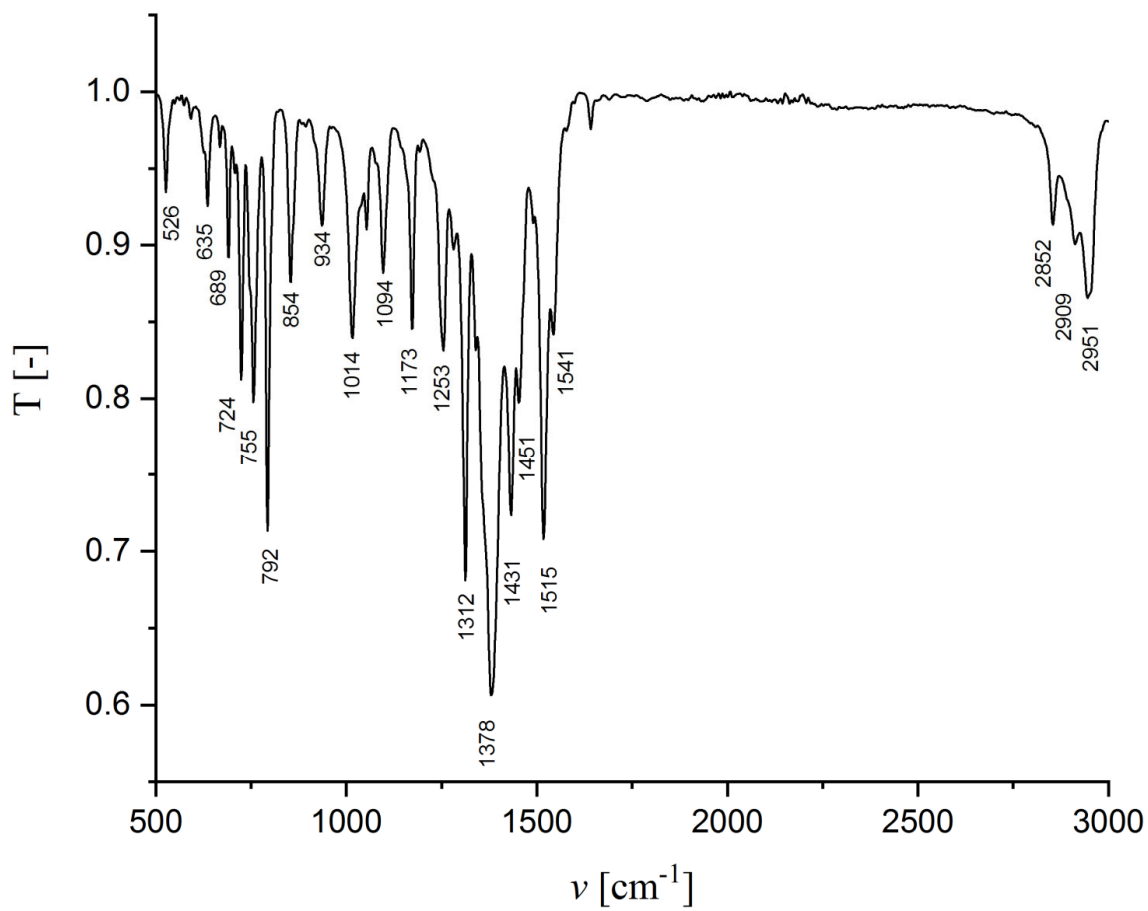

**Figure S12.** ATR-IR spectrum of **3a**.

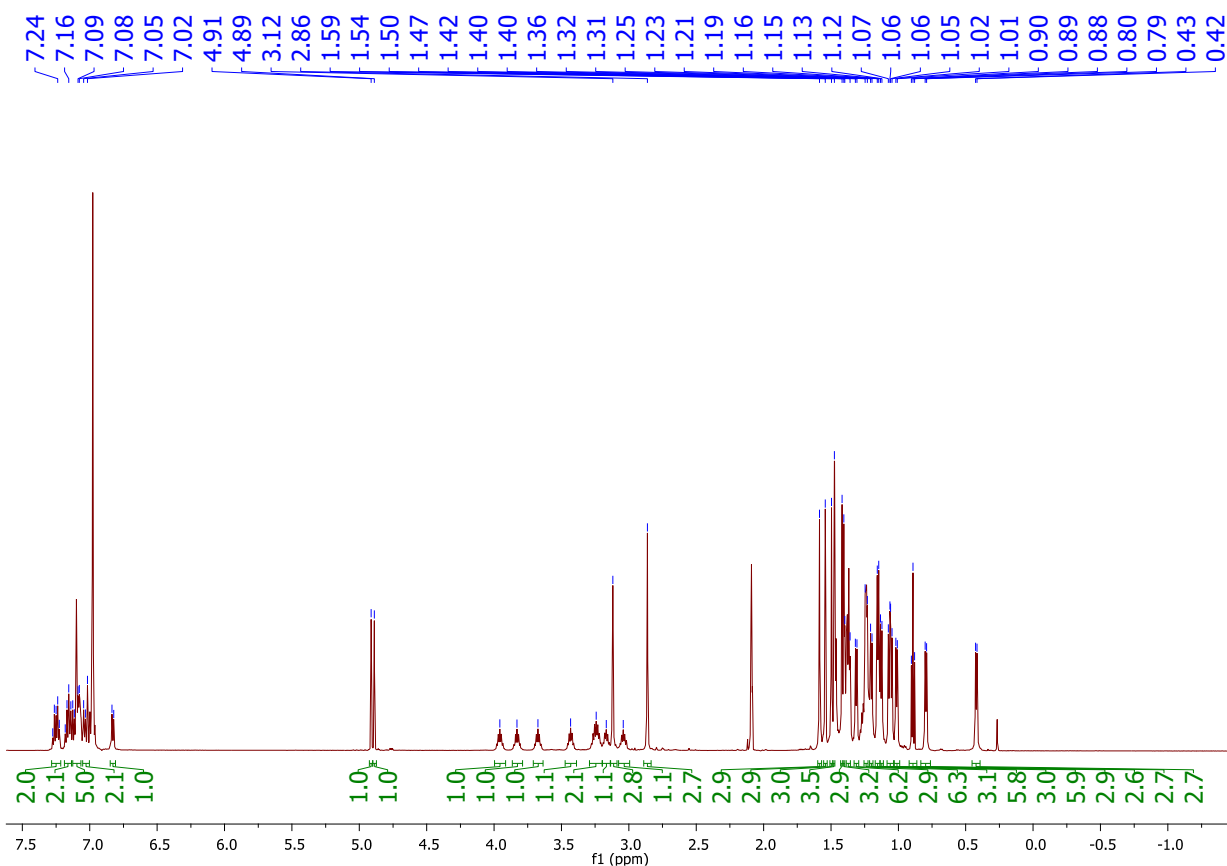

Figure S13.  $^1\text{H}$  NMR (500 MHz,  $\text{C}_7\text{D}_8$ , 298 K) spectrum of compound **3b**.

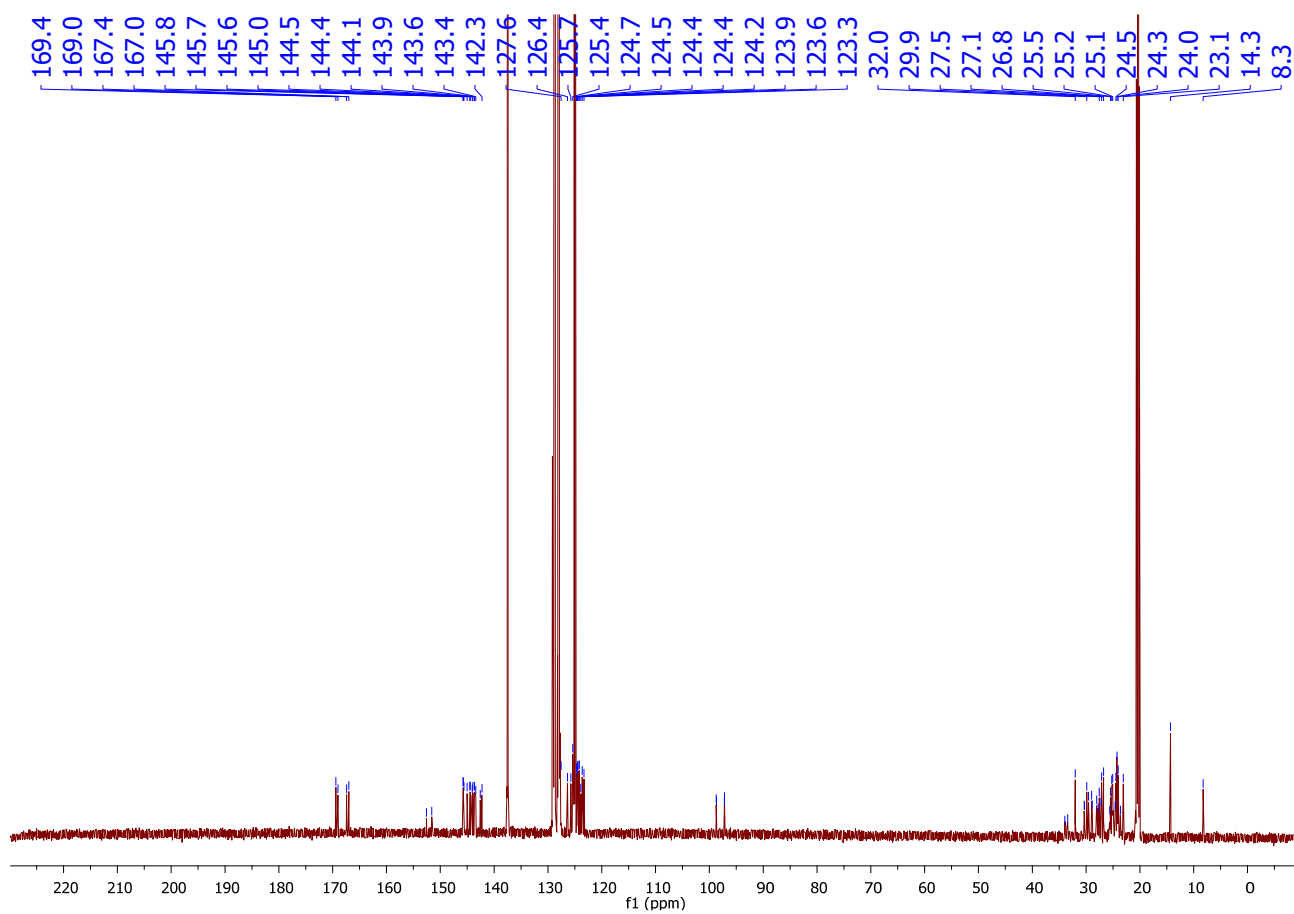

Figure S14.  $^{13}\text{C}\{^1\text{H}\}$  NMR (125 MHz,  $\text{C}_7\text{D}_8$ , 298 K) spectrum of compound **3b**.

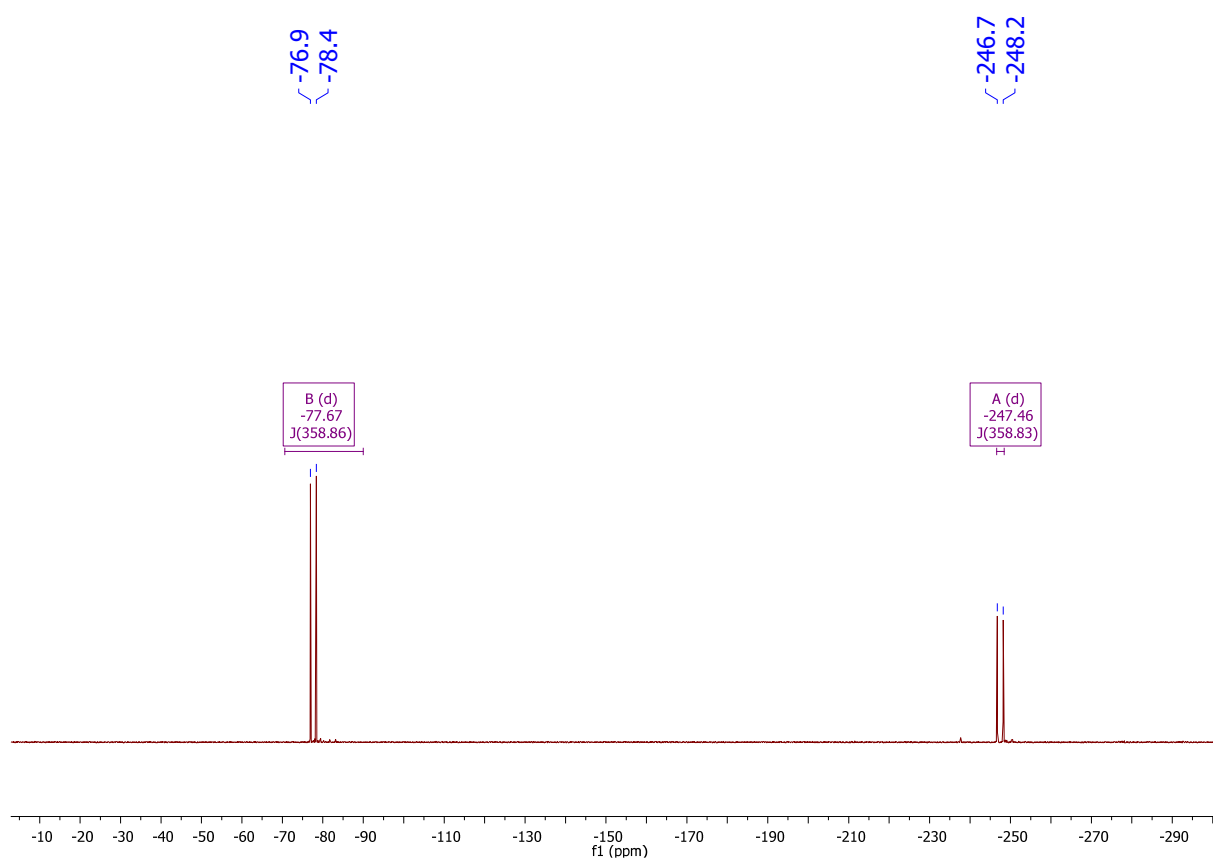

**Figure S15.**  ${}^{31}\text{P}\{^1\text{H}\}$  NMR (202 MHz,  $\text{C}_7\text{D}_8$ , 298 K) spectrum of compound **3b**.

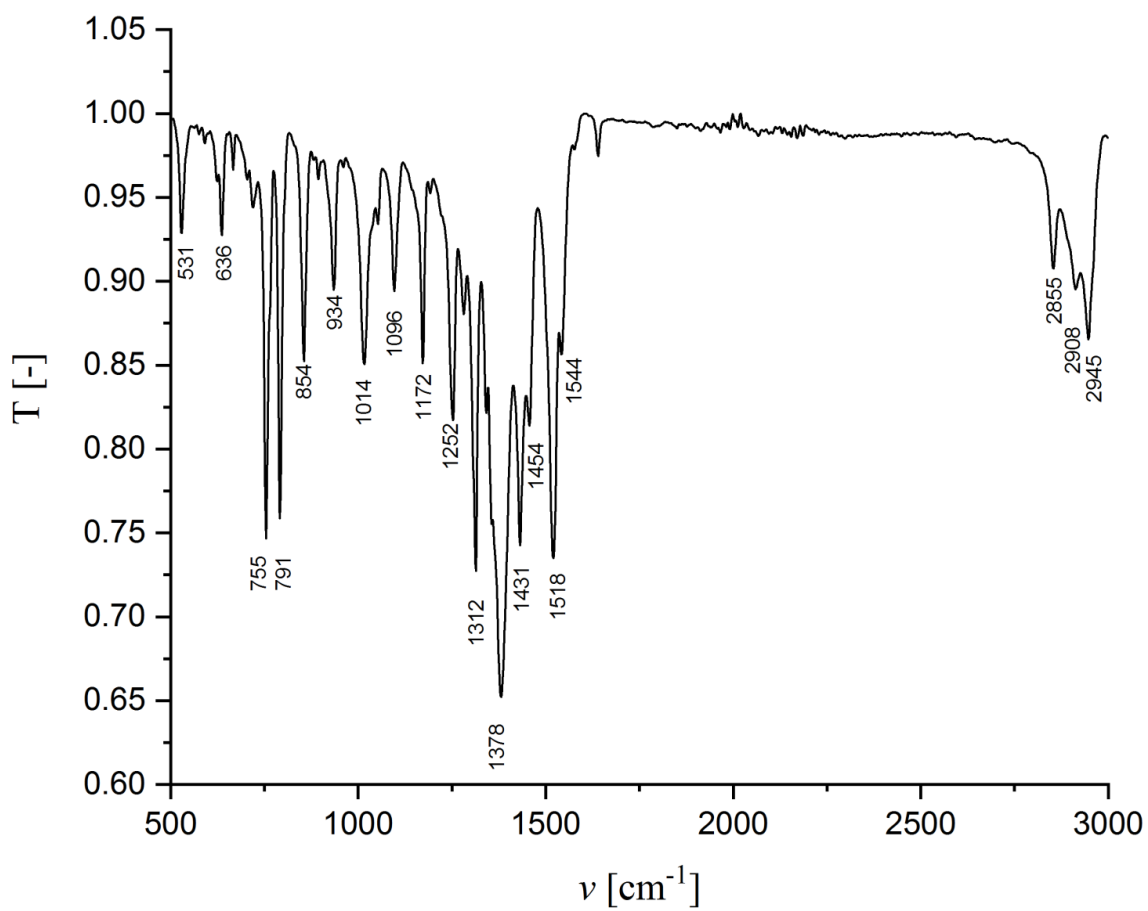

**Figure S16.** ATR-IR spectrum of **3b**.

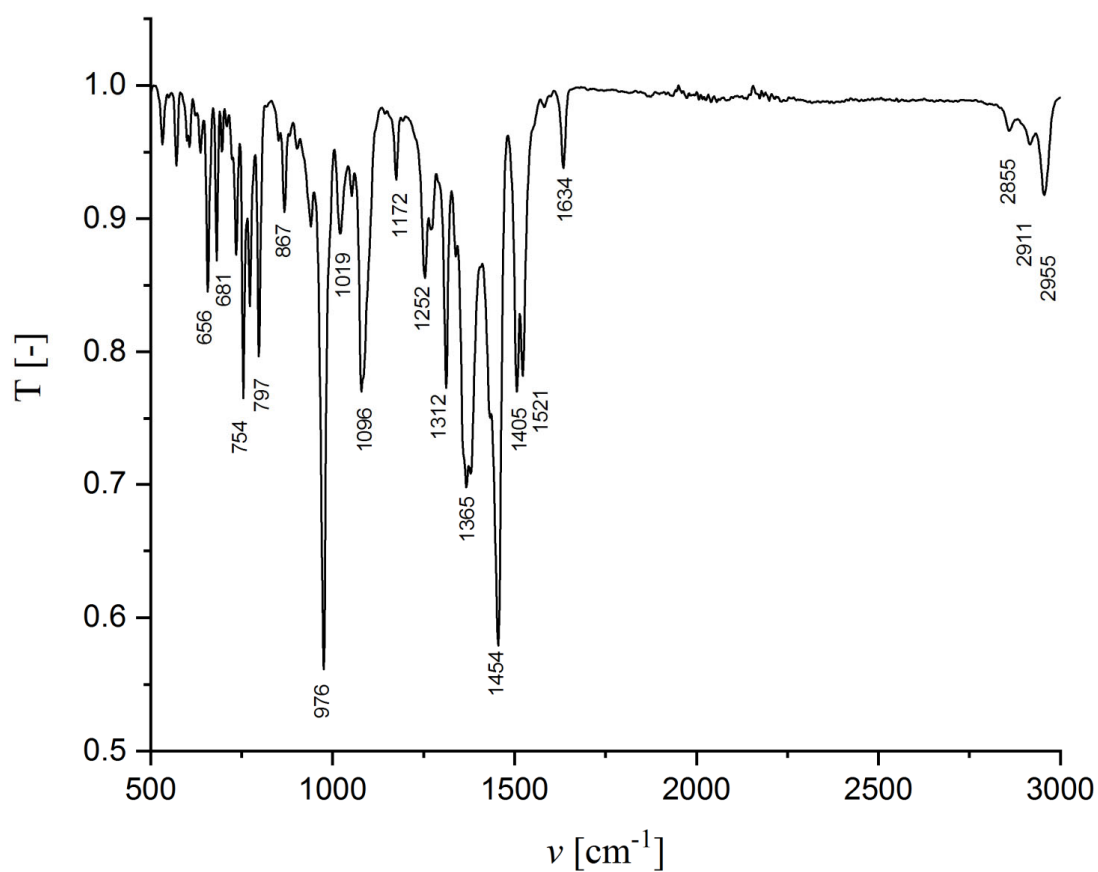

**Figure S17.** ATR-IR spectrum of **4a**.

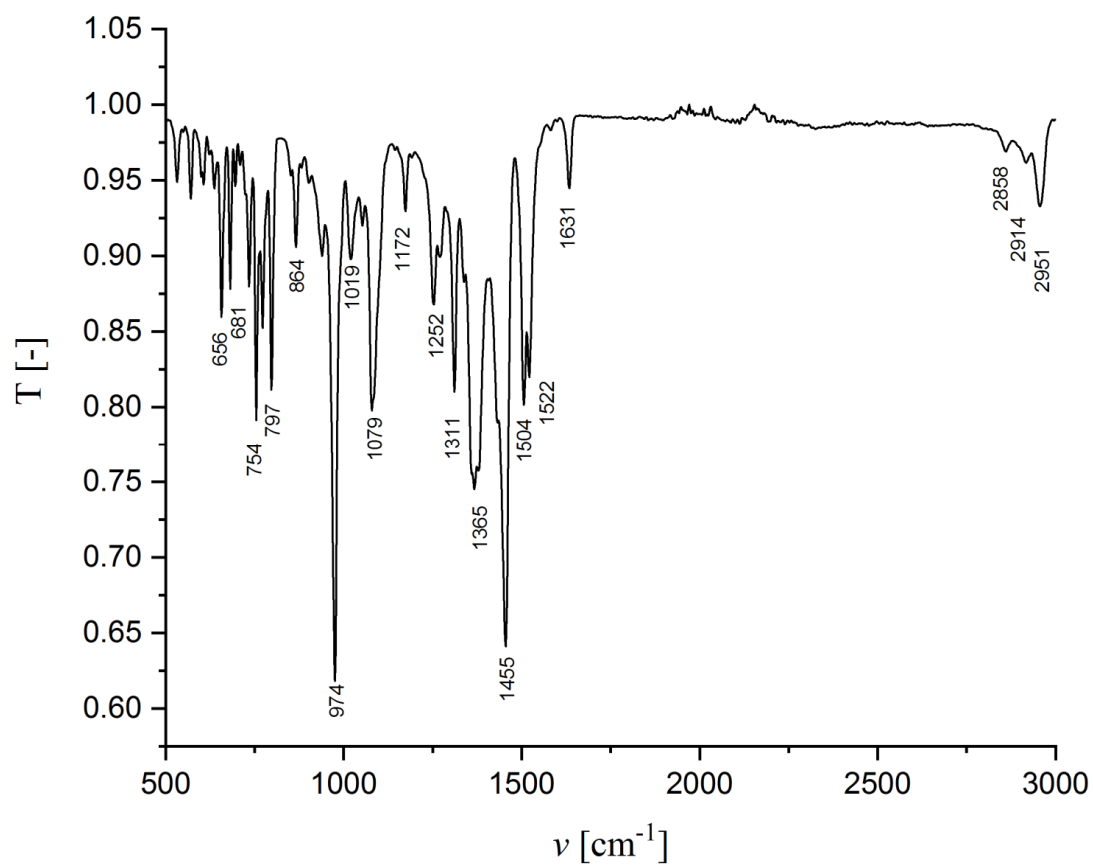

**Figure S18.** ATR-IR spectrum of **4b**.



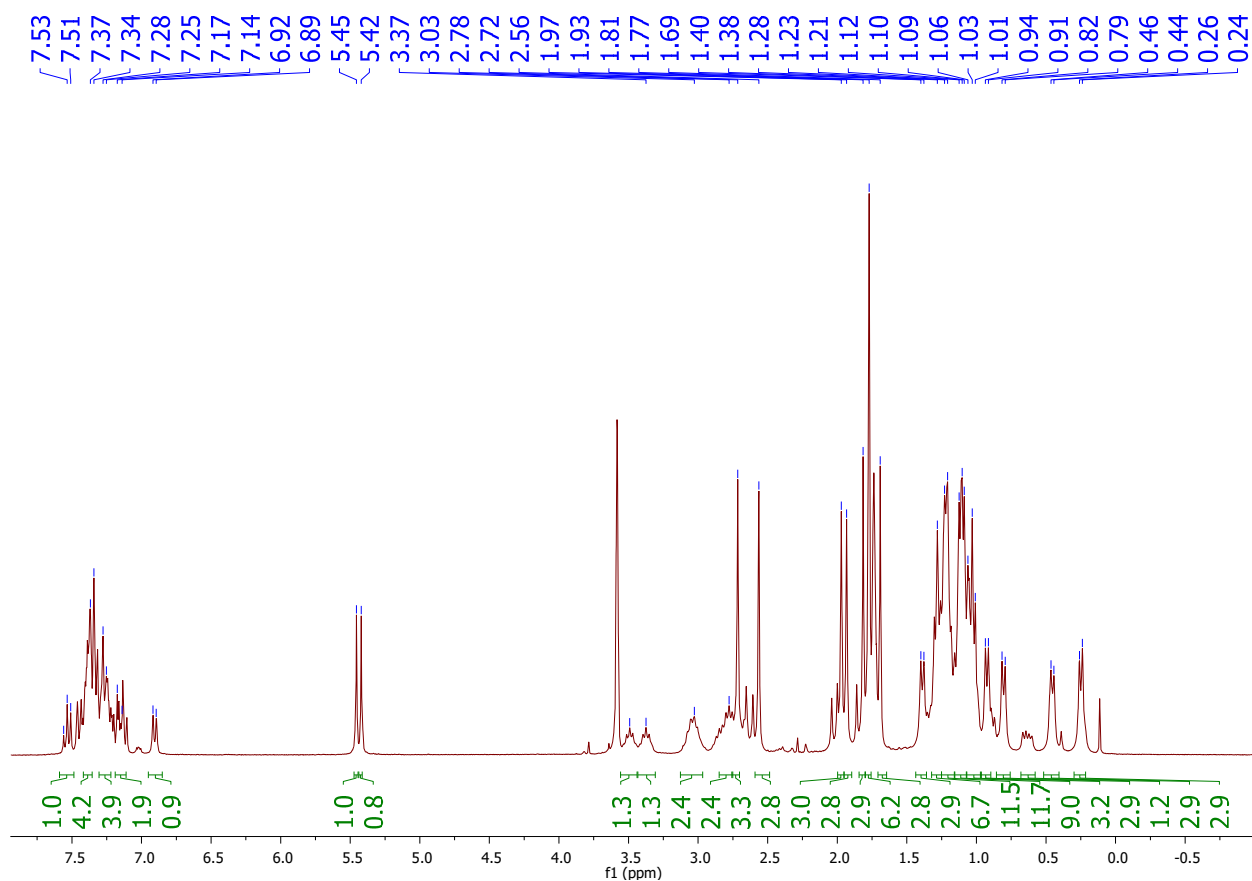

Figure S19.  $^1\text{H}$  NMR (300 MHz,  $\text{THF-}d_8$ , 298 K) spectrum of compound **5a**.

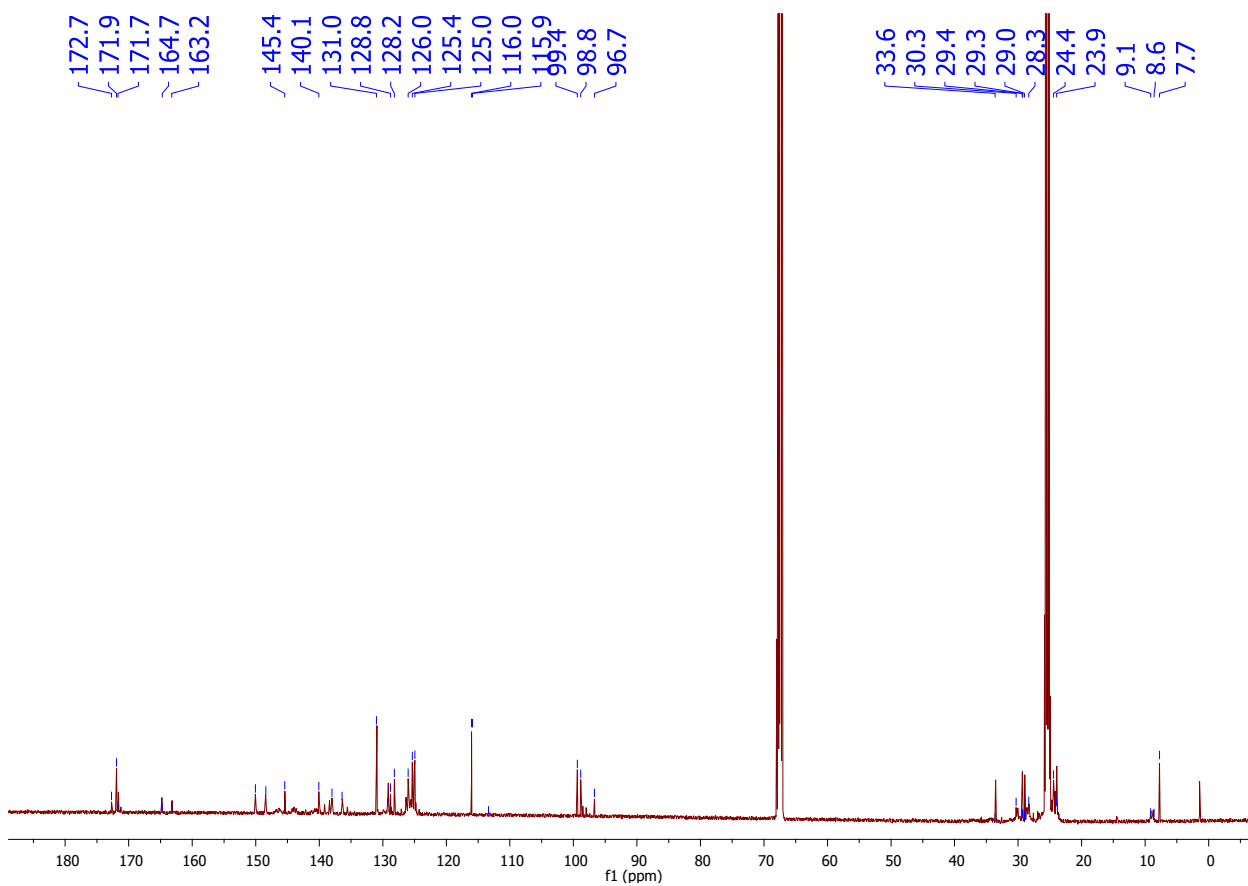

Figure S20.  $^{13}\text{C}\{^1\text{H}\}$  NMR (125 MHz,  $\text{THF-}d_8$ , 298 K) spectrum of compound **5a**.

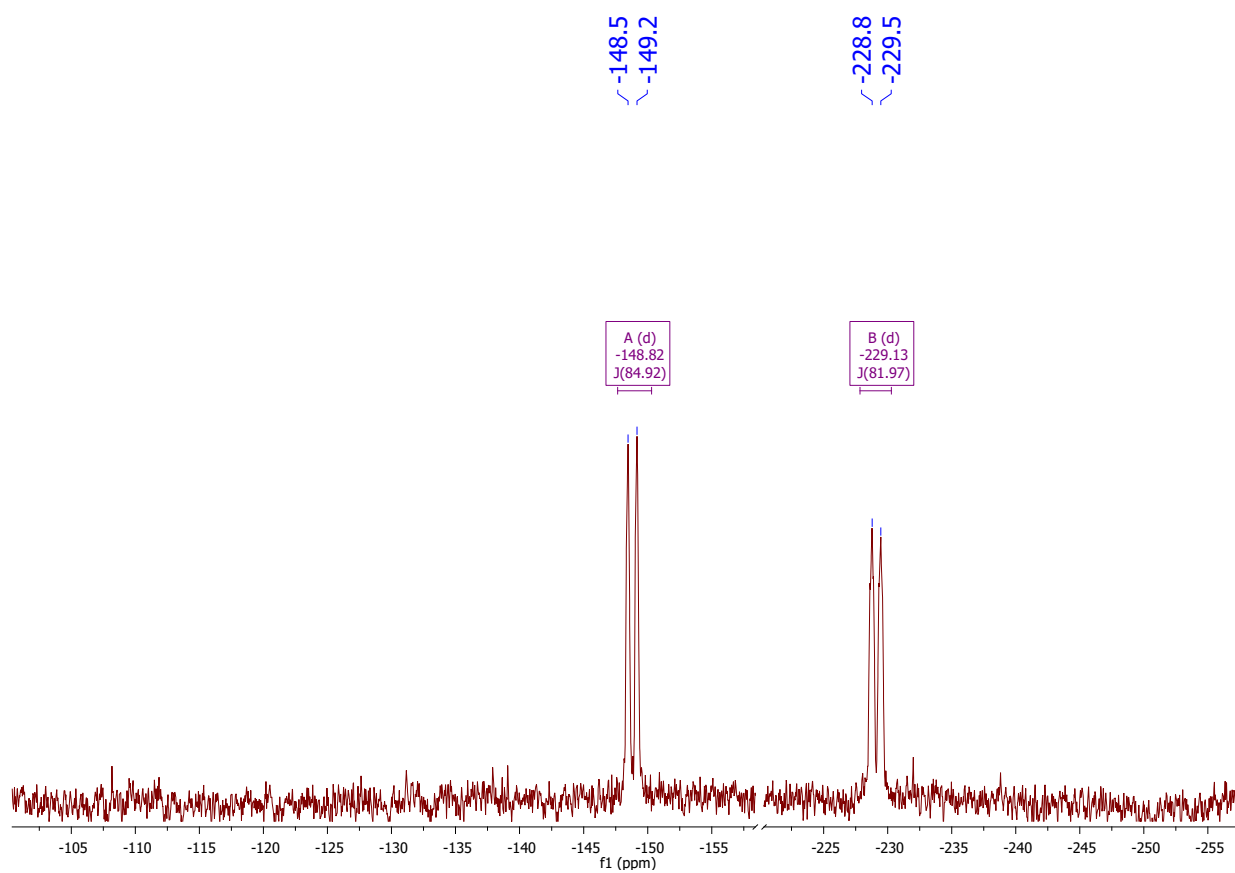

Figure S21.  $^{31}\text{P}\{^1\text{H}\}$  NMR (121 MHz, THF- $d_8$ , 298 K) spectrum of compound **5a**.

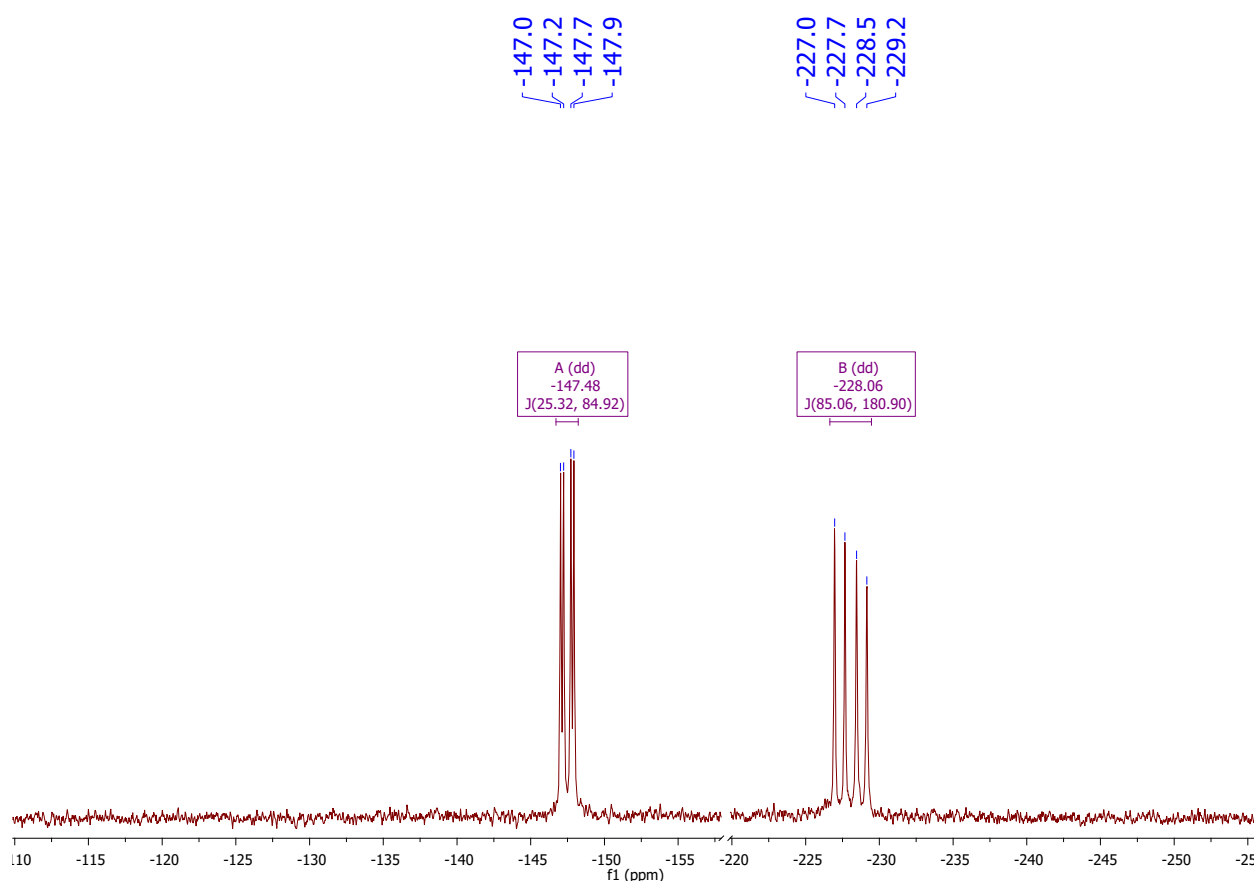

Figure S22.  $^{31}\text{P}$  NMR (121 MHz, THF- $d_8$ , 298 K) spectrum of compound **5a**.

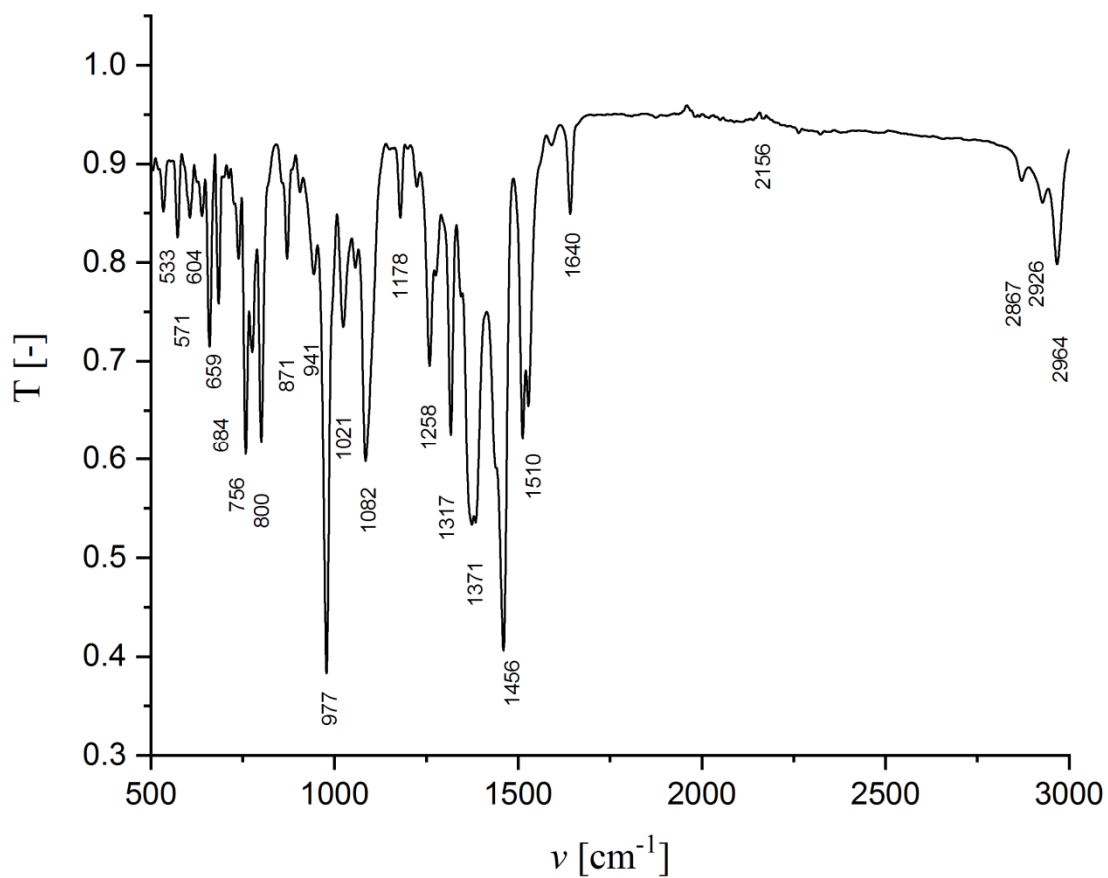

Figure S23. ATR-IR spectrum of 5a.

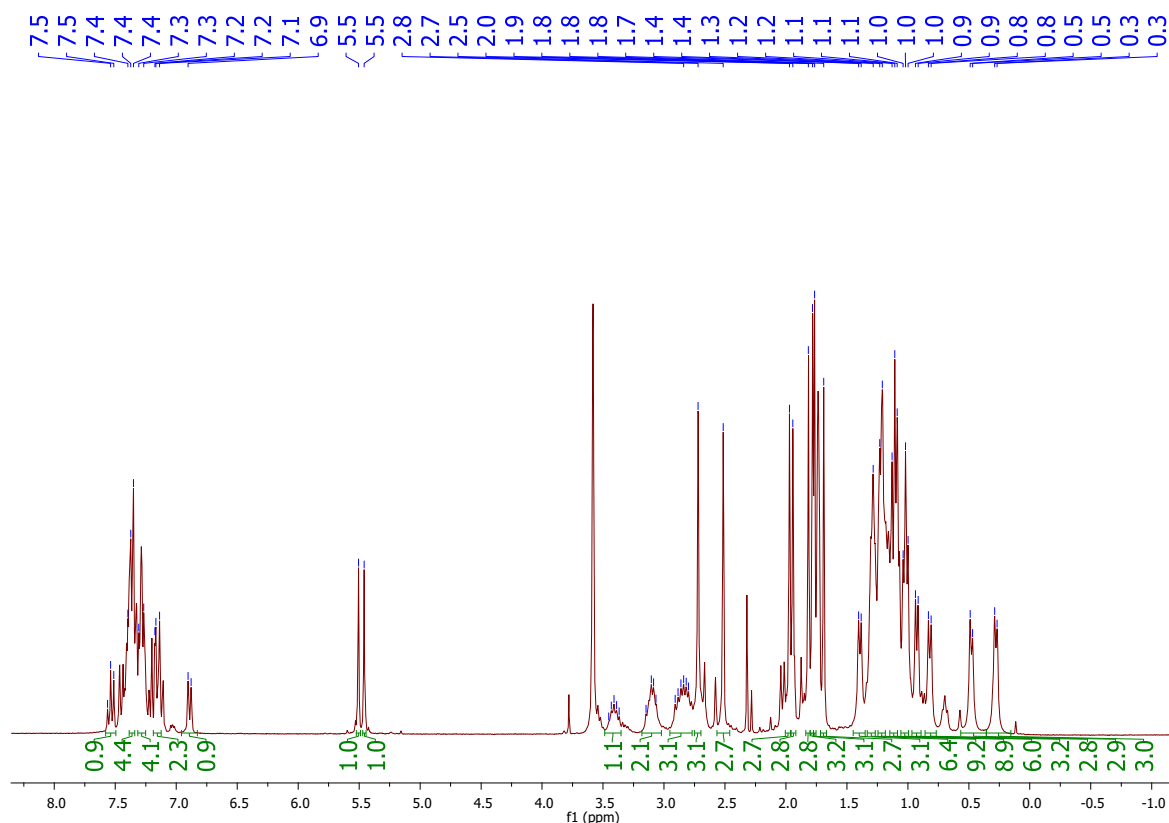

Figure S24.  $^1\text{H}$  NMR (300 MHz,  $\text{THF-d}_8$ , 298 K) spectrum of compound 5b.

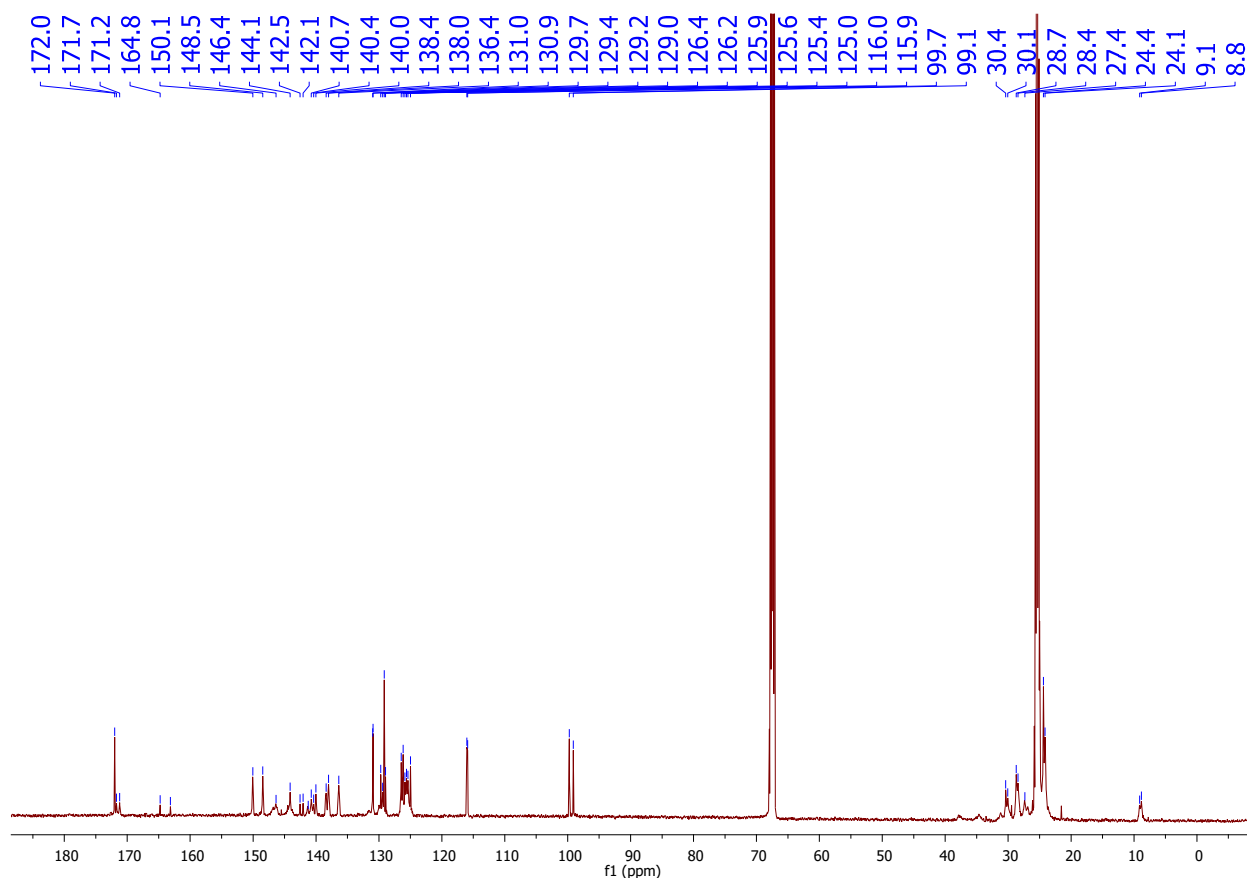

Figure S25.  $^{13}\text{C}\{^1\text{H}\}$  NMR (125 MHz, THF- $d_8$ , 298 K) spectrum of compound **5b**.

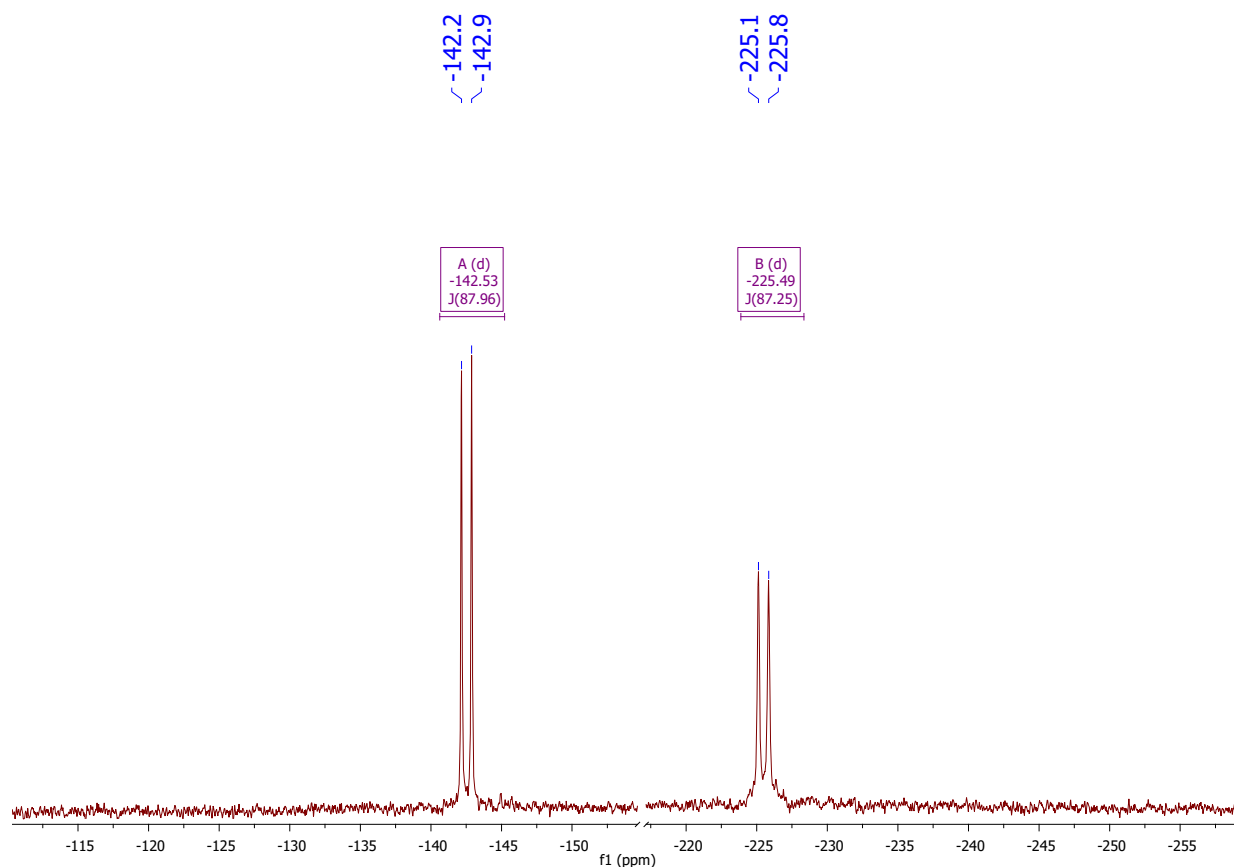

Figure S26.  $^{31}\text{P}\{^1\text{H}\}$  NMR (121 MHz, THF- $d_8$ , 298 K) spectrum of compound **5b**.

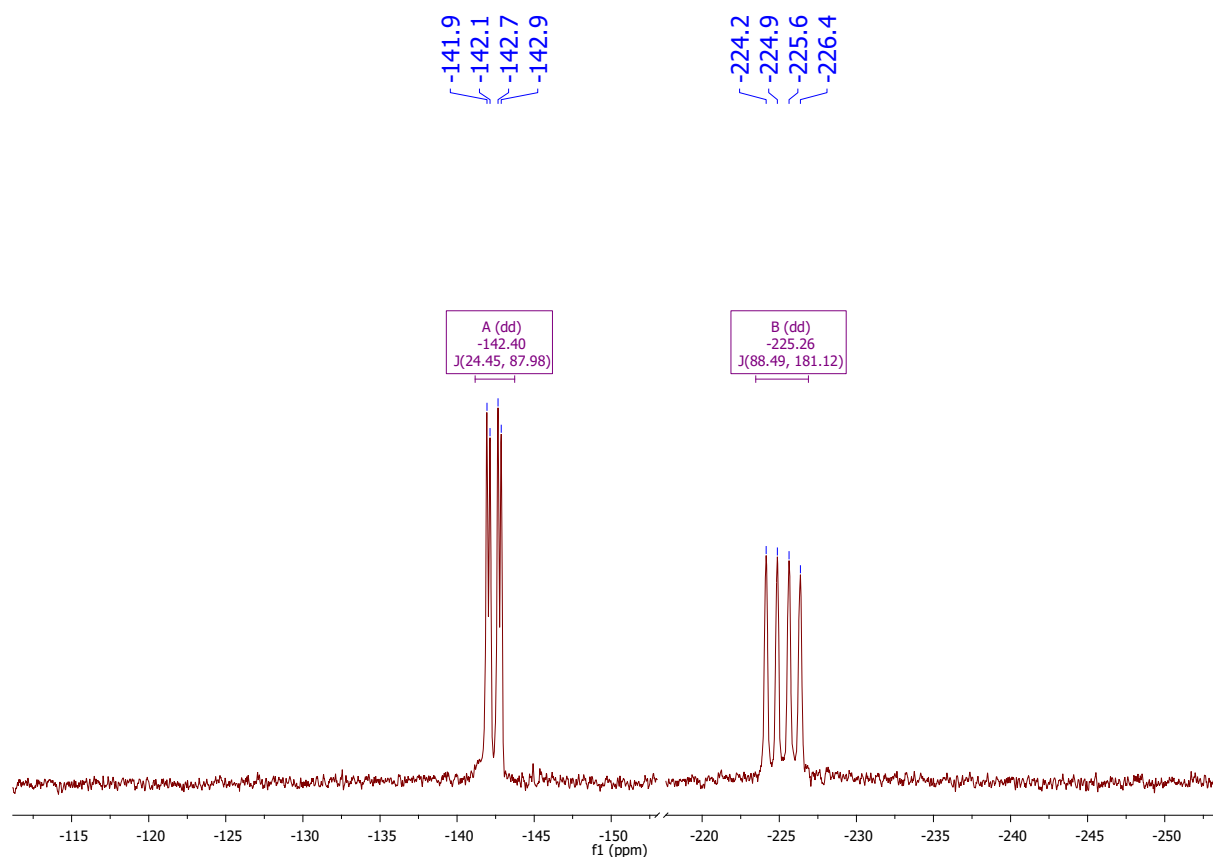

**Figure S27.**  $^{31}\text{P}$  NMR (121 MHz,  $\text{THF-}d_8$ , 298 K) spectrum of compound **5b**.

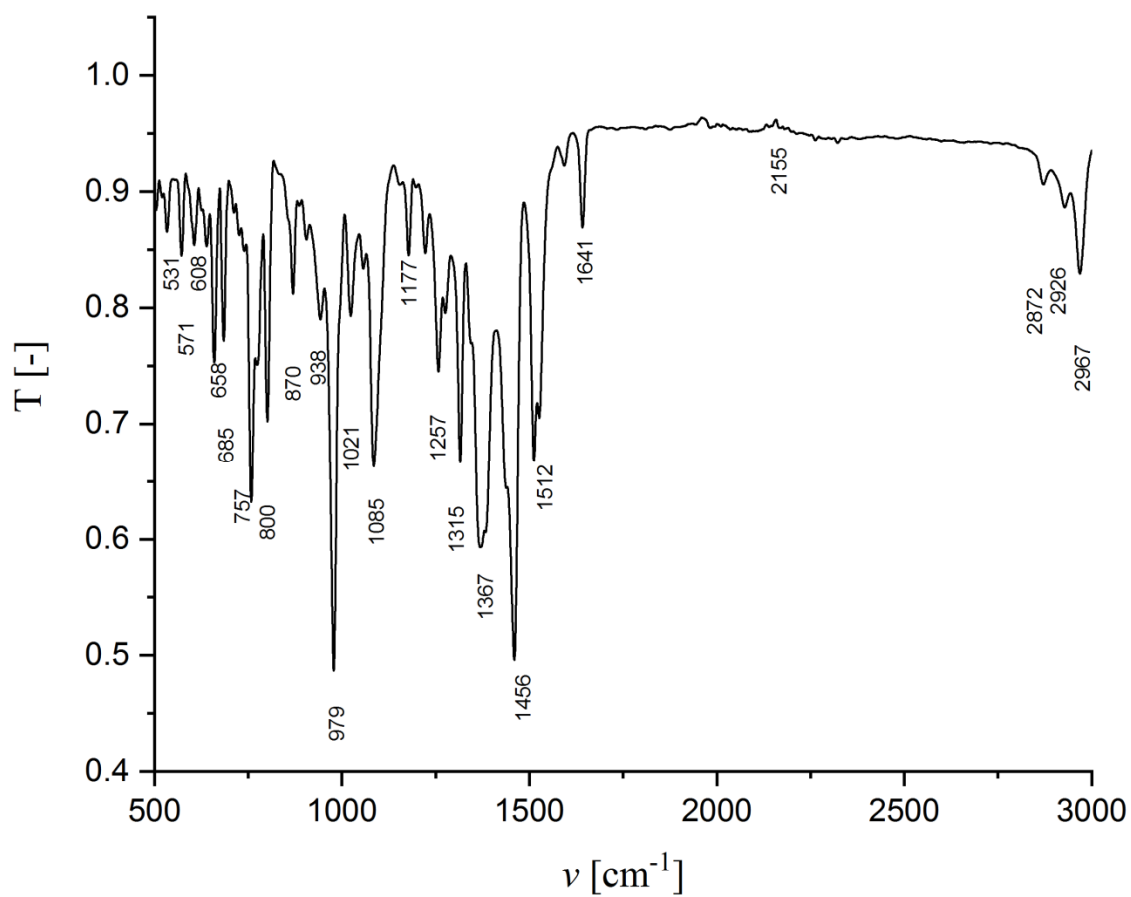

**Figure S28.** ATR-IR spectrum of **5b**.

### 3. Cyclic Voltammetry

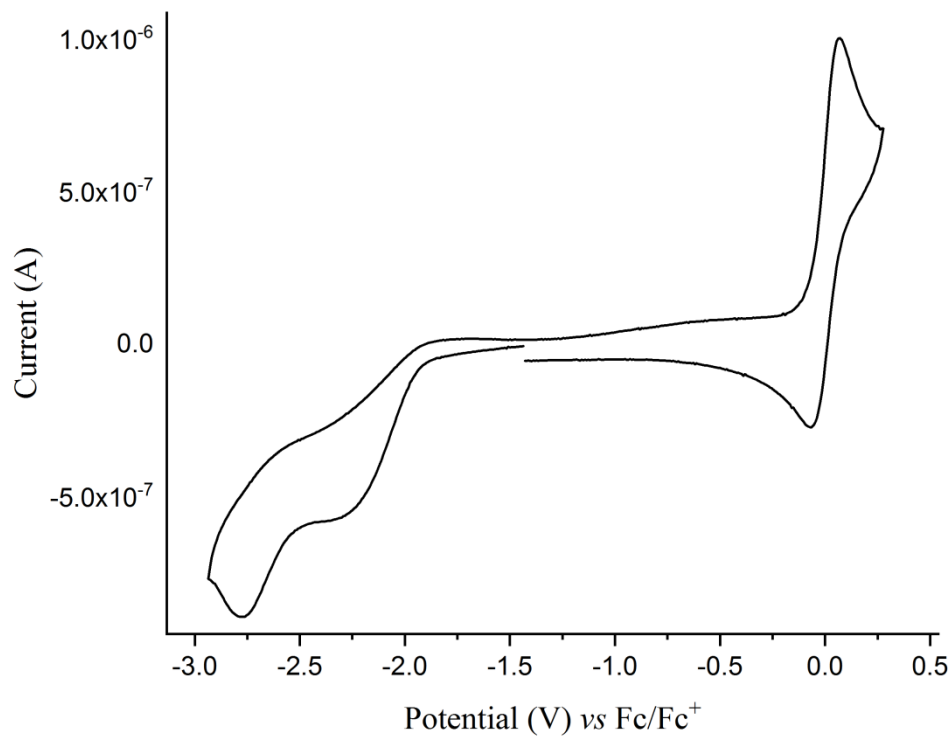

**Figure S29a.** Cyclic voltammogram of **2a** in THF (0.01 M *n*-Bu<sub>4</sub>N[PF<sub>6</sub>]) as a supporting electrolyte, 0.1Vs<sup>-1</sup>, vs Fc/Fc<sup>+</sup>.

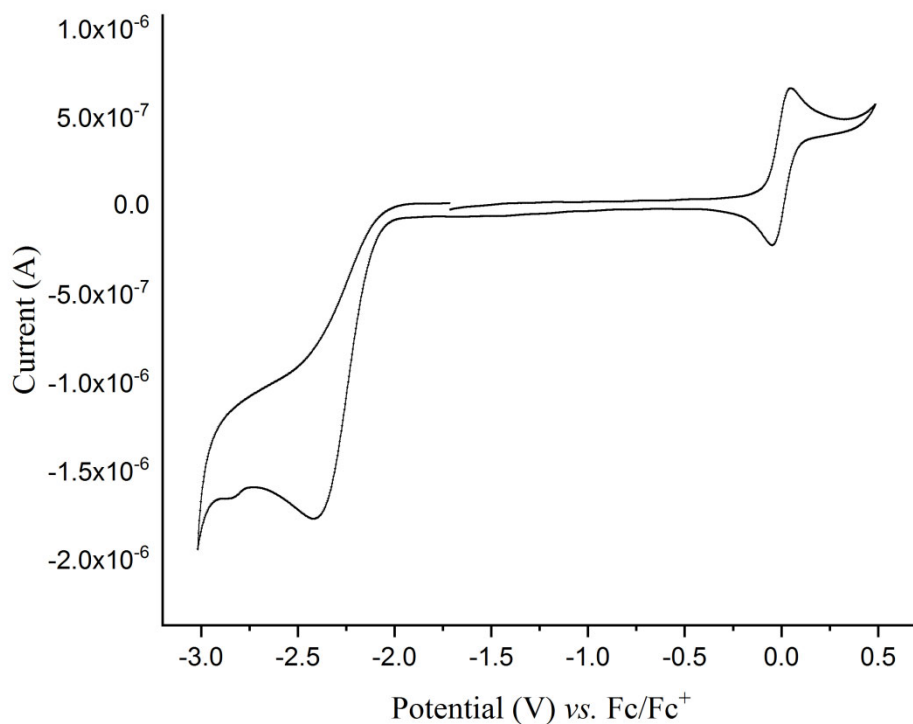

**Figure S29b.** Cyclic voltammogram of **2a** in THF (0.01 M *n*-Bu<sub>4</sub>N[B(C<sub>6</sub>F<sub>5</sub>)<sub>4</sub>]) as a supporting electrolyte, 0.1Vs<sup>-1</sup>, vs Fc/Fc<sup>+</sup>.

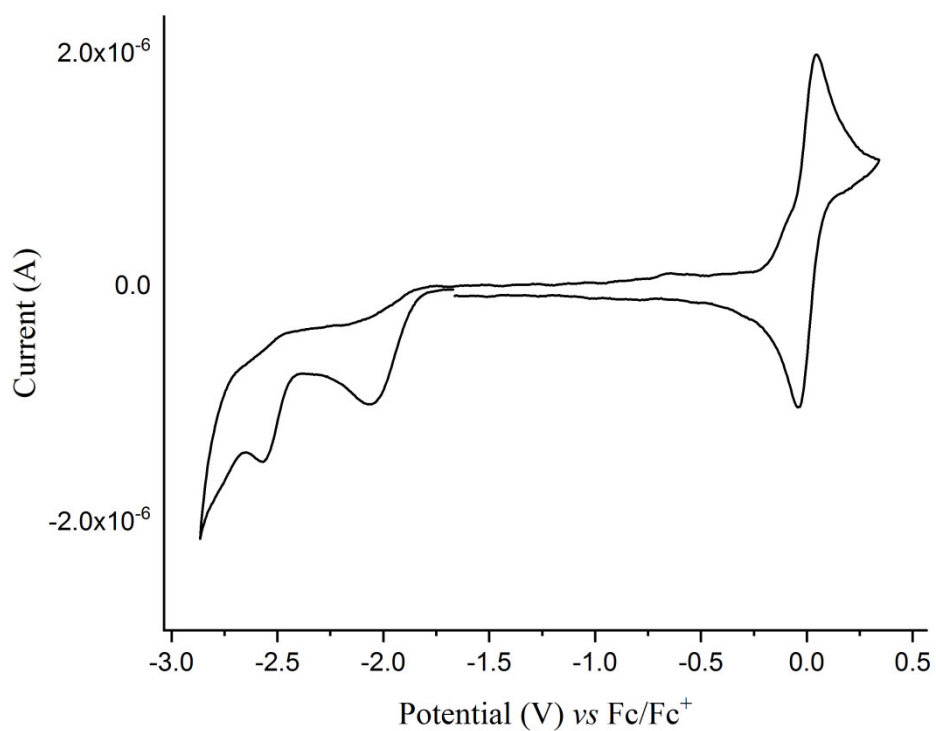

**Figure S30a.** Cyclic voltammogram of **2b** in THF (0.01 M *n*-Bu<sub>4</sub>N[PF<sub>6</sub>]) as a supporting electrolyte, 0.1Vs<sup>-1</sup>, vs Fc/Fc<sup>+</sup>.

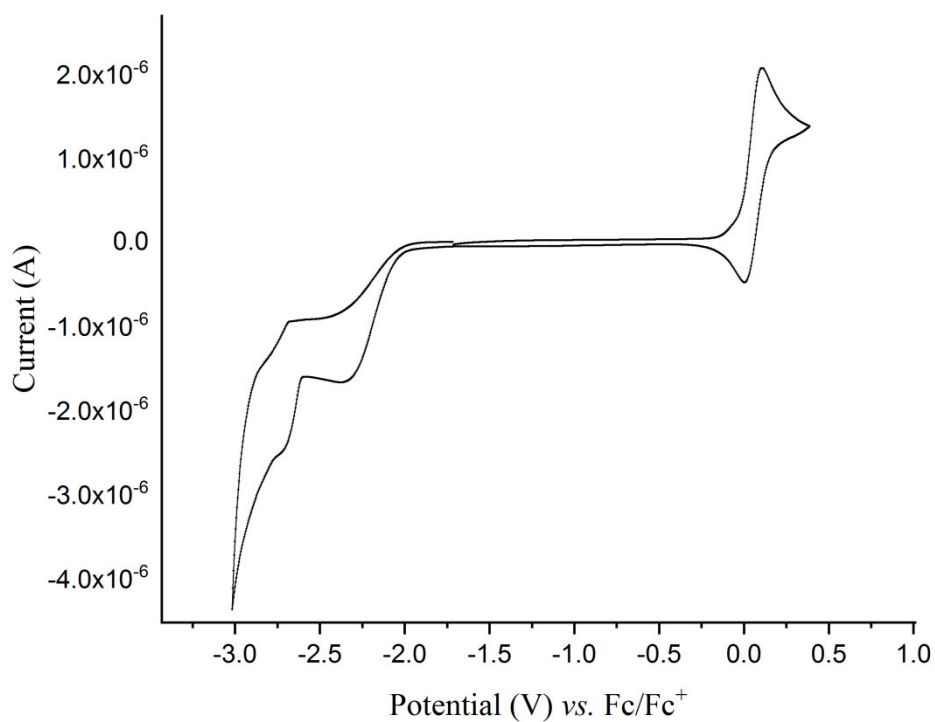

**Figure S30b.** Cyclic voltammogram of **2b** in THF (0.01 M *n*-Bu<sub>4</sub>N[B(C<sub>6</sub>F<sub>5</sub>)<sub>4</sub>]) as a supporting electrolyte, 0.1Vs<sup>-1</sup>, vs Fc/Fc<sup>+</sup>.

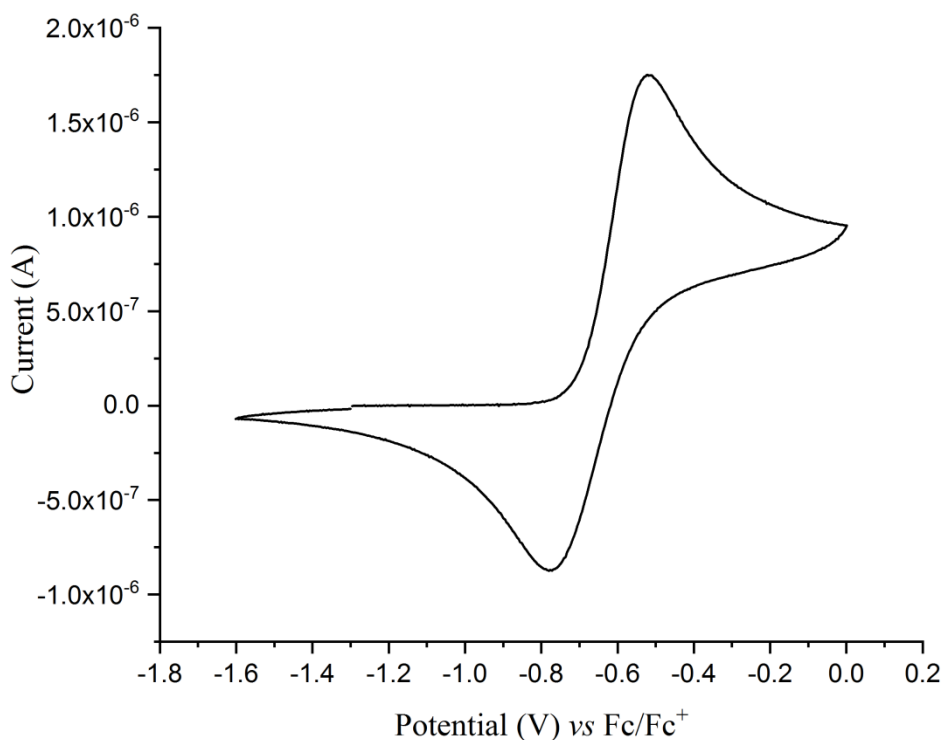

**Figure S31.** Cyclic voltammogram of **3a** in THF (0.01 M *n*-Bu<sub>4</sub>N[B(C<sub>6</sub>F<sub>5</sub>)<sub>4</sub>]) as a supporting electrolyte, 0.05Vs<sup>-1</sup>, vs Fc/Fc<sup>+</sup>). The cycle for Fc/Fc<sup>+</sup> couple has been removed for clarity.

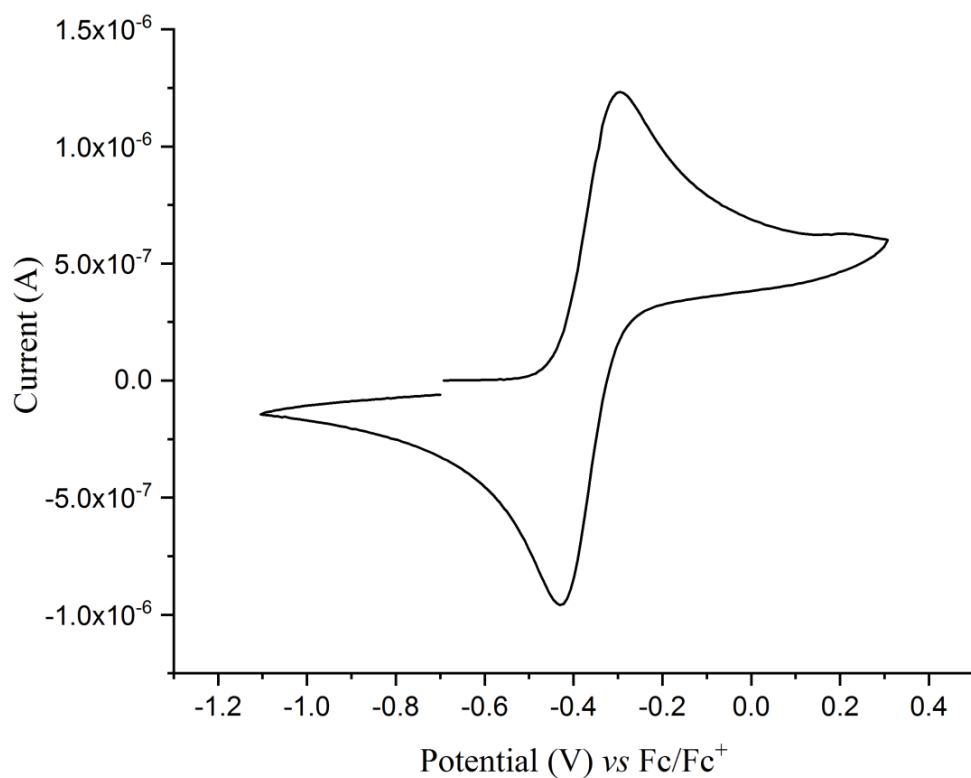

**Figure S32.** Cyclic voltammogram of **3b** in THF (0.01 M *n*-Bu<sub>4</sub>N[B(C<sub>6</sub>F<sub>5</sub>)<sub>4</sub>]) as a supporting electrolyte, 0.1Vs<sup>-1</sup>, vs Fc/Fc<sup>+</sup>). The cycle for Fc/Fc<sup>+</sup> couple has been removed for clarity.



#### 4. UV-vis Spectroscopy

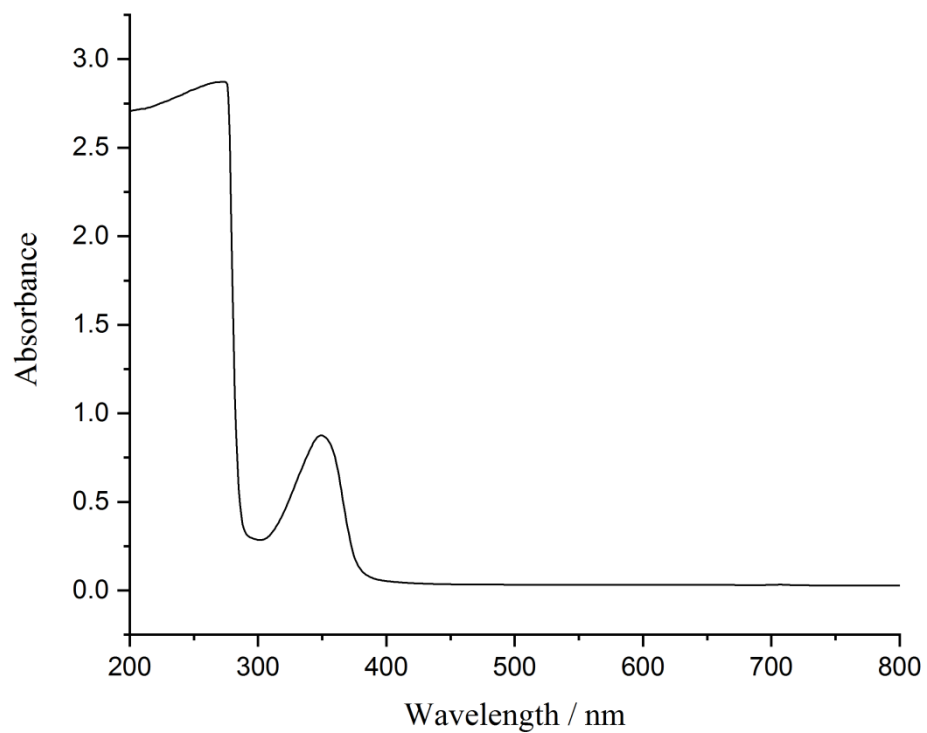

**Figure S33.** UV-visible spectrum of **2a** ( $10^{-4}$  M) recorded in fluorene.

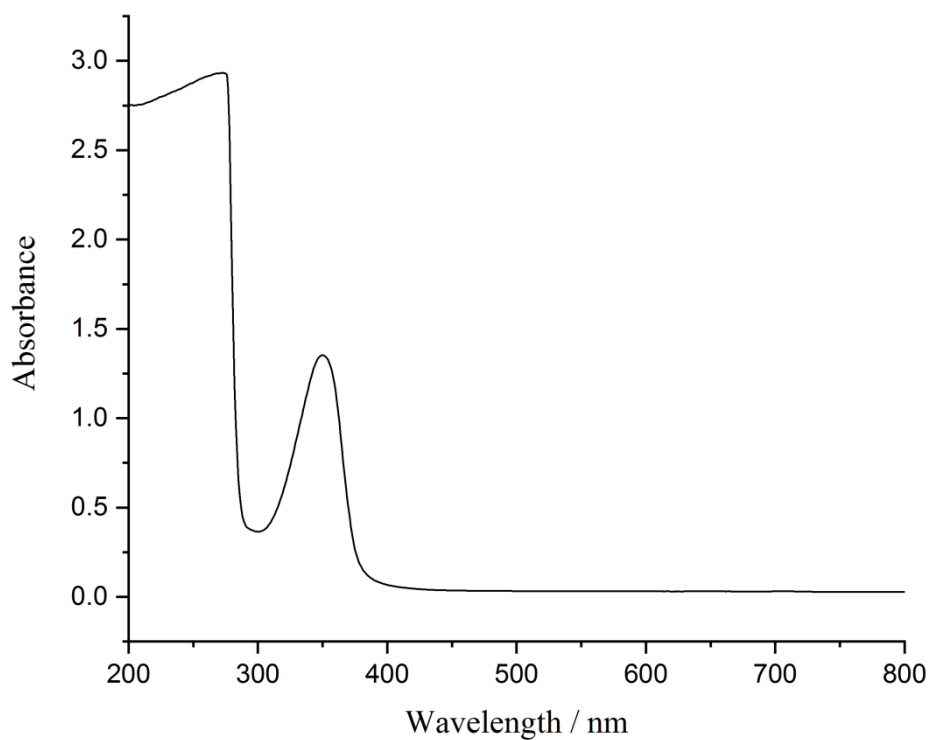

**Figure S34.** UV-visible spectrum of **2b** ( $10^{-4}$  M) recorded in fluorene.

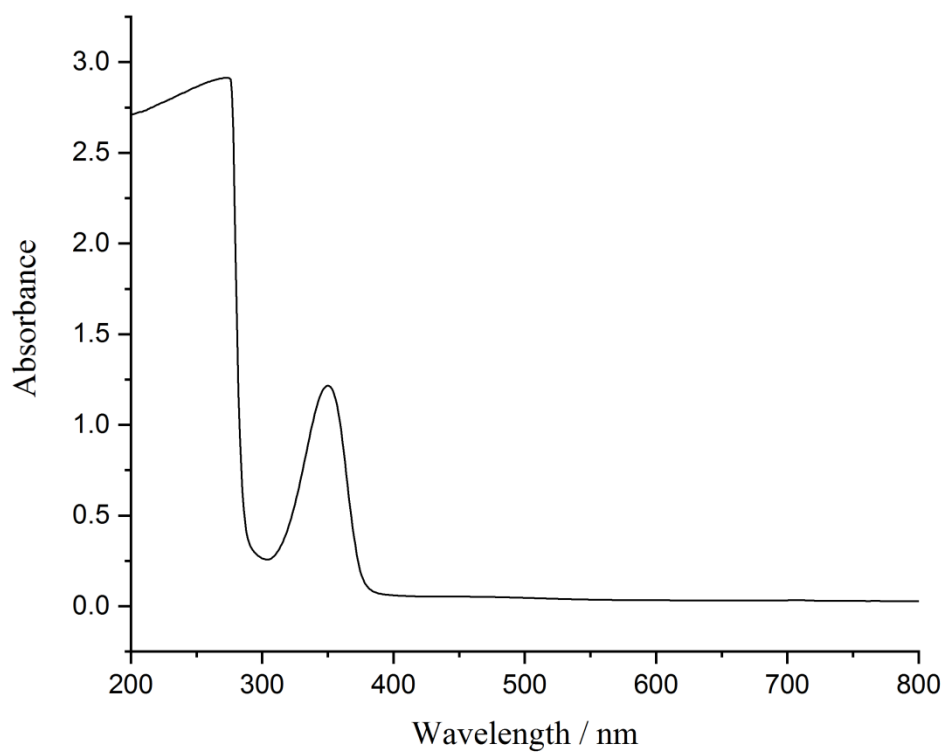

**Figure S35.** UV-visible spectrum of **3a** ( $10^{-4}$  M) recorded in fluorene.

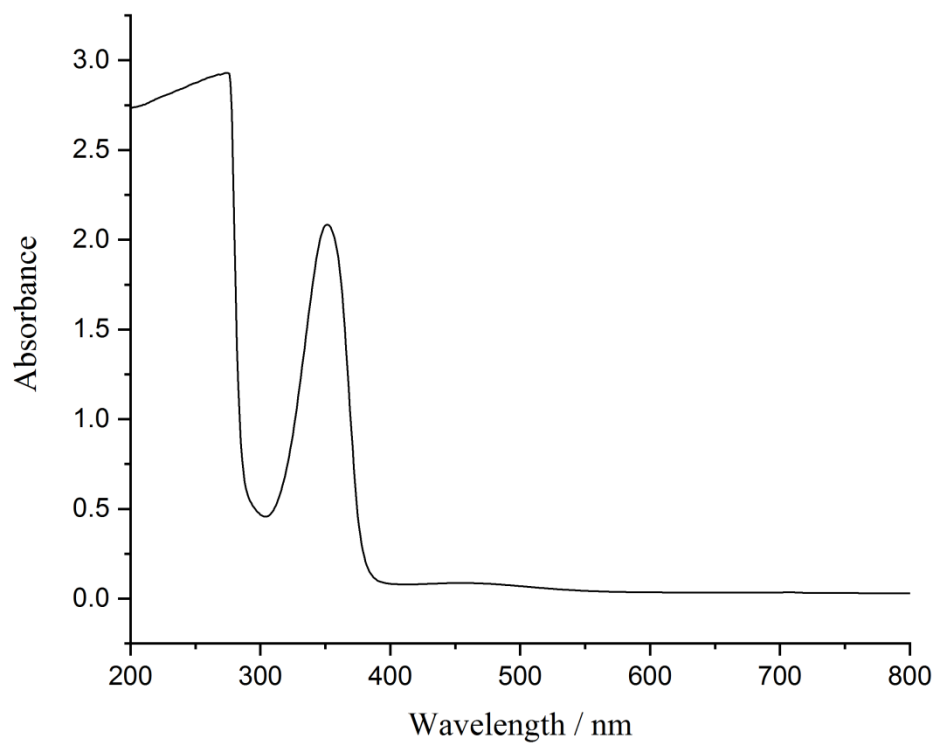

**Figure S36.** UV-visible spectrum of **3b** ( $10^{-4}$  M) recorded in fluorene.

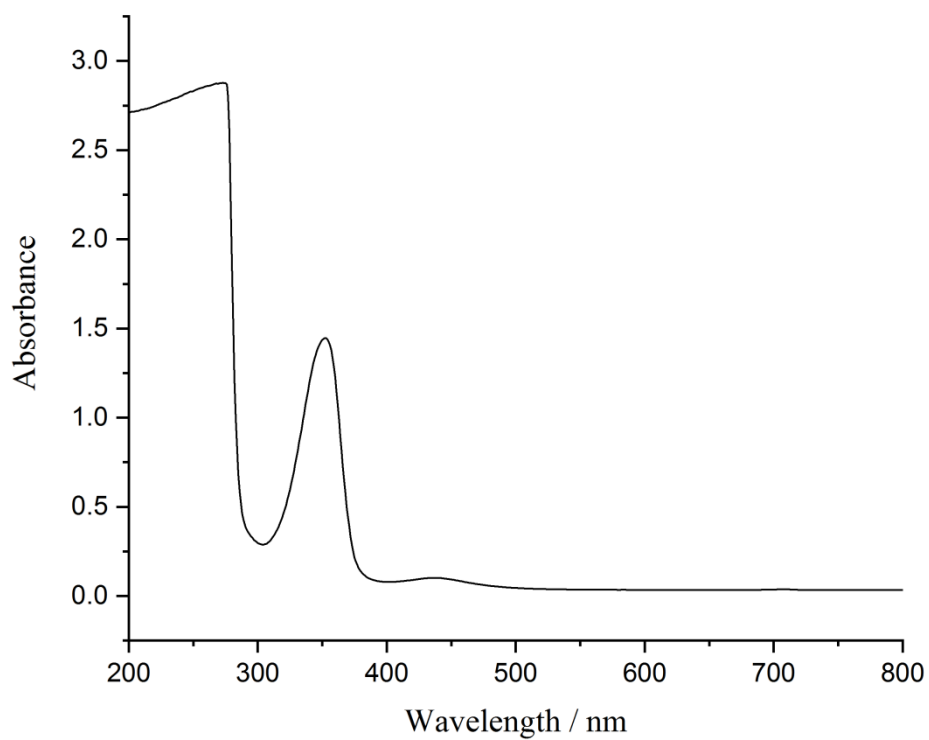

**Figure S37.** UV-visible spectrum of **4a** ( $10^{-4}$  M) recorded in fluorene.

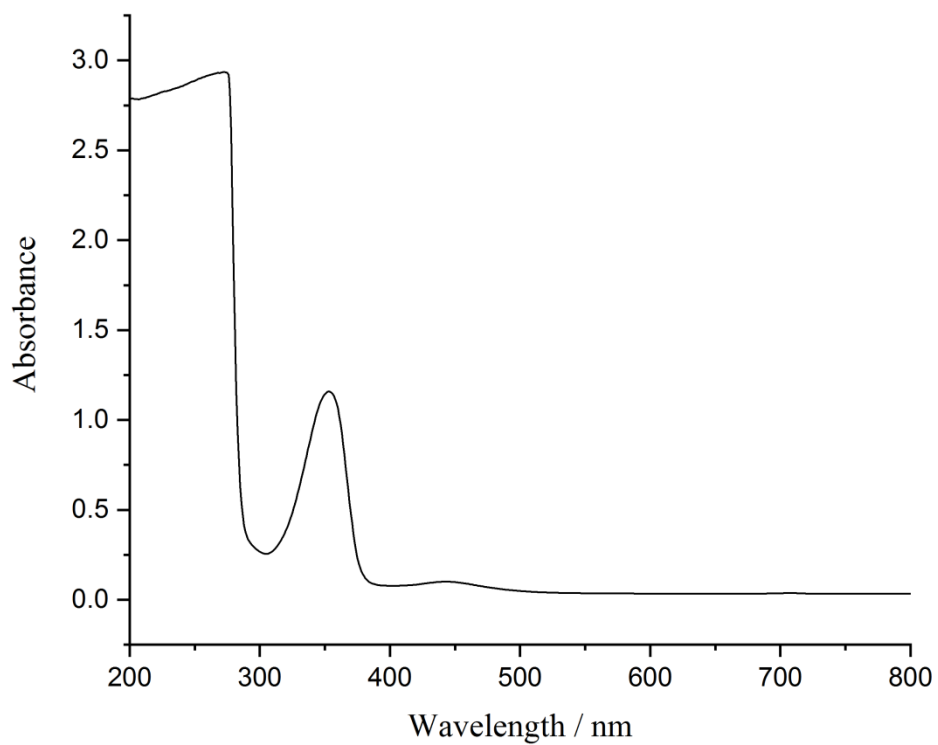

**Figure S38.** UV-visible spectrum of **4b** ( $10^{-4}$  M) recorded in fluorene.

## 5. X-Ray Crystallographic Analysis

The crystals were mounted on nylon loops in inert oil. Data of **2a**, **3a**, and **3b** were collected on a Bruker AXS D8 Kappa diffractometer with APEX2 detector (monochromated Mo $K_{\alpha}$  radiation,  $\lambda = 0.71073$  Å) at 100(2) K while those of **2b**, **4a**, **4b**, **5a**, and **5b** were collected on a Bruker AXS D8 Venture diffractometer with Photon II detector (monochromated Cu $K_{\alpha}$  radiation,  $\lambda = 1.54178$  Å, microfocus source) at 100(2) K. The structures were solved by Direct Methods (SHELXS-2013)<sup>[5]</sup> and refined anisotropically by full-matrix least-squares on  $F^2$  (SHELXL-2017).<sup>[6-8]</sup> Absorption corrections were performed semi-empirically from equivalent reflections on basis of multi-scans (Bruker AXS APEX3). Hydrogen atoms were refined using a riding model or rigid methyl groups.

In **2a** an isopropyl group is disordered over two positions. The structure of **3a** contains highly disordered solvent – possibly *n*-hexane. The final refinement was done with a solvent free dataset from a PLATON/SQUEEZE run. (For details see: A. L. Spek, *Acta Cryst. A46* (1990), 194–201). Since the nature and amount of the solvent is not clear it was not included in the sum formula. In **3b** an isopropyl group is disordered over two positions. All its corresponding bond lengths and angles were restrained to be equal (SADI). RIGU and SIMU restraints were applied to its atoms' anisotropic displacement parameters. The solvent molecule is disordered over a centre of inversion. Its bond lengths and angles were restrained to be equal (SADI) and RIGU restraints were used for the displacement parameters. Due to their close proximity C3\_1 and C3\_2 were refined with common displacement parameters (EADP). The central core of the cation of **4a** is disordered over two positions. The corresponding bond lengths and angles were restrained to be equal (SADI) and RIGU restraints were applied to the displacement parameters. Due to their close proximity C60 and C60' as well as C61 and C61' were refined with additional SIMU restraints. The toluene molecule is disordered over two positions. RIGU restraints were used for the refinement of its atoms' displacement parameters. In **4b** a second orientation of the central Br–Ga–P–P–Ga–Br chain could be identified and refined. Hints on the missing carbene of this component can be found in the residual electron density but due to the low occupancy (approx. 5%) the second orientation of the carbene could not be identified completely nor refined. RIGU and SIMU restraints were used to refine the displacement parameters of the minor component. For Ga2' and Br2' an additional ISOR ( $\sigma = 0.003$ ) restraint was necessary. In **5a** the PH hydrogen atoms were refined freely with their P–H bond lengths restrained to be equal (SADI). The central Ga(Cl)–PH–P(carbene)–Ga(Cl) moiety is disordered over two positions. For Ga1 and Cl1 a third orientation can be found but a refinement failed due to the low occupancy. The corresponding bond lengths of the carbene were restrained to be equal (SADI) and RIGU restraints were applied to its displacement parameters. For atoms in close proximity additional SIMU restraints were used. The structure contains highly disordered solvent – fluoro benzene or toluene. The final refinement was done with a solvent free dataset from a PLATON/SQUEEZE run. (For details see: A. L. Spek, *Acta Cryst. A46* (1990), 194–201). Since the nature and amount of the solvent is not clear it was not included in the sum formula. In **5b** the PH hydrogen atoms could not be identified in the residual electron density. Their positions were taken from the isomorphous chloro compound. The H atom of the larger disorder component was refined freely, the co-ordinates of the

one of the smaller were refined by a riding model (AFIX 3) and its displacement parameter was refined freely. The P–H bond lengths were restrained to be equal to 1.42 Å (DFIX). The proper assignment of these hydrogen atoms should be confirmed by other means. The central Ga(Br)–PH–P(carbene)–Ga(Br) moiety is disordered over two positions. The corresponding bond lengths of the carbene were restrained to be equal (SADI) and RIGU restraints were applied to its displacement parameters. For atoms in close proximity additional SIMU restraints were used. The alternate positions of N5 were refined with common displacement parameters (EADP). The structure also contains highly disordered solvent – possibly fluoro benzene or toluene. The final refinement was done with a solvent free dataset from a PLATON/SQUEEZE run. (For details see: A. L. Spek, *Acta Cryst. A* **46** (1990), 194–201). Since the nature and amount of the solvent is not clear, it was not included in the sum formula. The crystal was a very thin plate and diffracted rather poorly, esp. at higher angles. In addition, the highly anisotropic shape of the crystal hampered the absorption correction. This leads to a rather high  $R_{int}$ . Due to the weak data quantitative results should be carefully scrutinized and may be unreliable.

CCDC-2184009 (**2a**; mks\_001m), -2184010 (**2b**; mks\_005m), -2184011 (**3a**; mks\_037am\_sq), -2184012 (**3b**; mks\_049m), -2184320 (**4a**; mks\_057m), -2184142 (**4b**; mks\_056m), -2184019 (**5a**; mks\_073), and -2184020 (**5b**; mks\_077) contain the supplementary crystallographic data for this paper. These data can be obtained free of charge from The Cambridge Crystallographic Data Centre via [www.ccdc.cam.ac.uk/data\\_request/cif](http://www.ccdc.cam.ac.uk/data_request/cif).

**Table S1.** Crystal data and structure refinement of **2a**, **2b**, and **3a**.

| Compound                                                  | <b>2a</b>                                                                                     | <b>2b</b>                                                                                     | <b>3a</b>                                                                                     |
|-----------------------------------------------------------|-----------------------------------------------------------------------------------------------|-----------------------------------------------------------------------------------------------|-----------------------------------------------------------------------------------------------|
| Emp. formula                                              | C <sub>58</sub> H <sub>82</sub> Cl <sub>2</sub> Ga <sub>2</sub> N <sub>4</sub> P <sub>2</sub> | C <sub>58</sub> H <sub>82</sub> Br <sub>2</sub> Ga <sub>2</sub> N <sub>4</sub> P <sub>2</sub> | C <sub>65</sub> H <sub>94</sub> Cl <sub>2</sub> Ga <sub>2</sub> N <sub>6</sub> P <sub>2</sub> |
| Formula weight                                            | 1107.55                                                                                       | 1196.47                                                                                       | 1231.74                                                                                       |
| Temperature [K]                                           | 100(2)                                                                                        | 100(2)                                                                                        | 0.152 × 0.098 × 0.094                                                                         |
| Crystal system                                            | monoclinic                                                                                    | monoclinic                                                                                    | triclinic                                                                                     |
| Space group                                               | <i>P2<sub>1</sub>/n</i>                                                                       | <i>P2<sub>1</sub>/n</i>                                                                       | <i>P</i> -1                                                                                   |
| <i>a</i> [Å]                                              | 13.7010(18)                                                                                   | 13.6417(6)                                                                                    | 14.863(2)                                                                                     |
| <i>b</i> [Å]                                              | 13.8715(16)                                                                                   | 13.9614(6)                                                                                    | 20.330(5)                                                                                     |
| <i>c</i> [Å]                                              | 15.7041(18)                                                                                   | 15.7579(7)                                                                                    | 25.712(6)                                                                                     |
| $\alpha$ [°]                                              | 90                                                                                            | 90                                                                                            | 83.603(4)                                                                                     |
| $\beta$ [°]                                               | 105.336(6)                                                                                    | 105.1021(15)                                                                                  | 75.258(6)                                                                                     |
| $\gamma$ [°]                                              | 90                                                                                            | 90                                                                                            | 72.565(4)                                                                                     |
| <i>V</i> [Å <sup>3</sup> ]                                | 2878.3(6)                                                                                     | 2897.6(2)                                                                                     | 7163(3)                                                                                       |
| <i>Z</i>                                                  | 2                                                                                             | 2                                                                                             | 4                                                                                             |
| $\rho$ [Mgm <sup>-3</sup> ]                               | 1.278                                                                                         | 1.371                                                                                         | 1.142                                                                                         |
| $\mu$ [mm <sup>-1</sup> ]                                 | 1.124                                                                                         | 3.569                                                                                         | 0.910                                                                                         |
| <i>F</i> (000)                                            | 1168                                                                                          | 1240                                                                                          | 2608                                                                                          |
| Crystal size [mm]                                         | 0.452 x 0.402 x 0.368                                                                         | 0.151 × 0.136 × 0.096                                                                         | 0.152 × 0.098 × 0.094                                                                         |
| $\theta$ max [°]                                          | 40.215                                                                                        | 80.790                                                                                        | 30.528                                                                                        |
| Index ranges                                              | -16 ≤ <i>h</i> ≤ 24<br>-25 ≤ <i>k</i> ≤ 25<br>-28 ≤ <i>l</i> ≤ 27                             | -17 ≤ <i>h</i> ≤ 17<br>-17 ≤ <i>k</i> ≤ 17<br>-20 ≤ <i>l</i> ≤ 19                             | -21 ≤ <i>h</i> ≤ 21<br>-29 ≤ <i>k</i> ≤ 29<br>-36 ≤ <i>l</i> ≤ 36                             |
| No. of reflect. collected                                 | 72672                                                                                         | 113993                                                                                        | 264320                                                                                        |
| Unique reflect.                                           | 18029                                                                                         | 6312                                                                                          | 43665                                                                                         |
| <i>R</i> <sub>int</sub>                                   | 0.0346                                                                                        | 0.0431                                                                                        | 0.0782                                                                                        |
| Data / restraints / params.                               | 18029 / 0 / 347                                                                               | 6312 / 0 / 317                                                                                | 43665 / 0 / 1435                                                                              |
| Goodness-of-fit on <i>F</i> <sup>2</sup>                  | 1.043                                                                                         | 1.032                                                                                         | 1.032                                                                                         |
| <i>R</i> 1 [ <i>I</i> > 2σ( <i>I</i> )]                   | 0.0330                                                                                        | 0.0228                                                                                        | 0.0436                                                                                        |
| <i>wR</i> 2 [ <i>I</i> > 2σ( <i>I</i> )]                  | 0.0822                                                                                        | 0.0593                                                                                        | 0.1016                                                                                        |
| <i>R</i> 1 [all data]                                     | 0.0495                                                                                        | 0.0243                                                                                        | 0.0756                                                                                        |
| <i>wR</i> 2 [all data]                                    | 0.0910                                                                                        | 0.0593                                                                                        | 0.1119                                                                                        |
| Largest diff. peak and hole max./min.[e·Å <sup>-3</sup> ] | 1.096 and -0.610                                                                              | 0.502 and -0.377                                                                              | 1.550 and -0.921                                                                              |

**Table S2.** Crystal data and structure refinement of **3b**, **4a**, and **4b**.

| Compound                                                   | <b>3b</b>                                                                                      | <b>4a</b>                                                                                                       | <b>4b</b>                                                                                                      |
|------------------------------------------------------------|------------------------------------------------------------------------------------------------|-----------------------------------------------------------------------------------------------------------------|----------------------------------------------------------------------------------------------------------------|
| Emp. formula                                               | C <sub>68</sub> H <sub>101</sub> Br <sub>2</sub> Ga <sub>2</sub> N <sub>6</sub> P <sub>2</sub> | C <sub>96</sub> H <sub>102</sub> BCl <sub>2</sub> F <sub>20</sub> Ga <sub>2</sub> N <sub>6</sub> P <sub>2</sub> | C <sub>89</sub> H <sub>94</sub> BBr <sub>2</sub> F <sub>20</sub> Ga <sub>2</sub> N <sub>6</sub> P <sub>2</sub> |
| Formula weight                                             | 1363.74                                                                                        | 2002.92                                                                                                         | 1999.71                                                                                                        |
| Temperature [K]                                            | 100(2)                                                                                         | 100(2)                                                                                                          | 100(2)                                                                                                         |
| Crystal system                                             | monoclinic                                                                                     | triclinic                                                                                                       | monoclinic                                                                                                     |
| Space group                                                | <i>P2<sub>1</sub>/n</i>                                                                        | <i>P</i> -1                                                                                                     | <i>P2<sub>1</sub>/c</i>                                                                                        |
| <i>a</i> [Å]                                               | 14.7131(10)                                                                                    | 12.6151(10)                                                                                                     | 21.557(2)                                                                                                      |
| <i>b</i> [Å]                                               | 25.5509(18)                                                                                    | 16.6393(13)                                                                                                     | 20.432(2)                                                                                                      |
| <i>c</i> [Å]                                               | 18.5397(13)                                                                                    | 23.1348(18)                                                                                                     | 20.684(2)                                                                                                      |
| $\alpha$ [°]                                               | 90                                                                                             | 77.844(3)                                                                                                       | 90                                                                                                             |
| $\beta$ [°]                                                | 99.6843(16)                                                                                    | 77.731(3)                                                                                                       | 20.684(2)                                                                                                      |
| $\gamma$ [°]                                               | 90                                                                                             | 86.897(3)                                                                                                       | 90                                                                                                             |
| <i>V</i> [Å <sup>3</sup> ]                                 | 6870.4(8)                                                                                      | 4638.6(6)                                                                                                       | 8979.6(16)                                                                                                     |
| <i>Z</i>                                                   | 4                                                                                              | 2                                                                                                               | 4                                                                                                              |
| $\rho$ [Mgm <sup>-3</sup> ]                                | 1.318                                                                                          | 1.434                                                                                                           | 1.479                                                                                                          |
| $\mu$ [mm <sup>-1</sup> ]                                  | 2.037                                                                                          | 2.344                                                                                                           | 2.888                                                                                                          |
| <i>F</i> (000)                                             | 2852                                                                                           | 2062                                                                                                            | 4068                                                                                                           |
| Crystal size [mm]                                          | 0.477 × 0.204 × 0.122                                                                          | 0.326 × 0.149 × 0.080                                                                                           | 0.130 × 0.112 × 0.096                                                                                          |
| $\theta$ max [°]                                           | 33.212                                                                                         | 80.659                                                                                                          | 81.277                                                                                                         |
| Index ranges                                               | -22 ≤ <i>h</i> ≤ 22<br>-39 ≤ <i>k</i> ≤ 39<br>-28 ≤ <i>l</i> ≤ 28                              | -16 ≤ <i>h</i> ≤ 16<br>-21 ≤ <i>k</i> ≤ 21<br>-29 ≤ <i>l</i> ≤ 29                                               | -27 ≤ <i>h</i> ≤ 27<br>-26 ≤ <i>k</i> ≤ 25<br>-26 ≤ <i>l</i> ≤ 26                                              |
| No. of reflect. collected                                  | 228807                                                                                         | 283933                                                                                                          | 405733                                                                                                         |
| Unique reflect.                                            | 26297                                                                                          | 20142                                                                                                           | 19684                                                                                                          |
| <i>R</i> <sub>int</sub>                                    | 0.0514                                                                                         | 0.0434                                                                                                          | 0.0949                                                                                                         |
| Data / restraints / params.                                | 20984 / 117 / 799                                                                              | 18999 / 266 / 1392                                                                                              | 16685 / 39 / 1178                                                                                              |
| Goodness-of-fit on <i>F</i> <sup>2</sup>                   | 1.043                                                                                          | 1.171                                                                                                           | 1.011                                                                                                          |
| <i>R</i> 1 [ <i>I</i> > 2σ( <i>I</i> )]                    | 0.0314                                                                                         | 0.0382                                                                                                          | 0.0281                                                                                                         |
| <i>wR</i> 2 [ <i>I</i> > 2σ( <i>I</i> )]                   | 0.0641                                                                                         | 0.0850                                                                                                          | 0.0665                                                                                                         |
| <i>R</i> 1 [all data]                                      | 0.0501                                                                                         | 0.0407                                                                                                          | 0.0369                                                                                                         |
| <i>wR</i> 2 [all data]                                     | 0.0703                                                                                         | 0.0862                                                                                                          | 0.0706                                                                                                         |
| Largest diff. peak and hole max./min. [e·Å <sup>-3</sup> ] | 0.774 and -0.463                                                                               | 0.580 and -0.506                                                                                                | 0.430 and -0.708                                                                                               |

**Table S3.** Crystal data and structure refinement of **5a**, and **5b**.

| Compound                                                | <b>5a</b>                                                                                                      | <b>5b</b>                                                                                                      |
|---------------------------------------------------------|----------------------------------------------------------------------------------------------------------------|----------------------------------------------------------------------------------------------------------------|
| Emp. formula                                            | C <sub>89</sub> H <sub>95</sub> BCl <sub>2</sub> F <sub>20</sub> Ga <sub>2</sub> N <sub>6</sub> P <sub>2</sub> | C <sub>89</sub> H <sub>95</sub> BBr <sub>2</sub> F <sub>20</sub> Ga <sub>2</sub> N <sub>6</sub> P <sub>2</sub> |
| Formula weight                                          | 1911.79                                                                                                        | 2000.71                                                                                                        |
| Temperature [K]                                         | 100(2)                                                                                                         | 100(2)                                                                                                         |
| Crystal system                                          | triclinic                                                                                                      | triclinic                                                                                                      |
| Space group                                             | <i>P</i> -1                                                                                                    | <i>P</i> -1                                                                                                    |
| <i>a</i> [Å]                                            | 12.5203(3)                                                                                                     | 12.5498(4)                                                                                                     |
| <i>b</i> [Å]                                            | 16.6728(5)                                                                                                     | 16.6890(7)                                                                                                     |
| <i>c</i> [Å]                                            | 23.1865(7)                                                                                                     | 23.2672(9)                                                                                                     |
| $\alpha$ [°]                                            | 78.0634(15)                                                                                                    | 77.921(2)                                                                                                      |
| $\beta$ [°]                                             | 77.1747(12)                                                                                                    | 77.403(2)                                                                                                      |
| $\gamma$ [°]                                            | 87.3124(14)                                                                                                    | 87.595(2)                                                                                                      |
| <i>V</i> [Å <sup>3</sup> ]                              | 4617.3(2)                                                                                                      | 4650.5(3)                                                                                                      |
| <i>Z</i>                                                | 2                                                                                                              | 2                                                                                                              |
| $\rho$ [Mgm <sup>-3</sup> ]                             | 1.375                                                                                                          | 1.429                                                                                                          |
| $\mu$ [mm <sup>-1</sup> ]                               | 2.327                                                                                                          | 2.789                                                                                                          |
| <i>F</i> (000)                                          | 1964                                                                                                           | 2036                                                                                                           |
| Crystal size [mm]                                       | 0.261 x 0.171 x 0.142                                                                                          | 0.144 x 0.124 x 0.015                                                                                          |
| $\theta$ max [°]                                        | 2.71 to 79.55                                                                                                  | 1.988 to 75.216                                                                                                |
| Index ranges                                            | -15 ≤ <i>h</i> ≤ 15<br>-21 ≤ <i>k</i> ≤ 21<br>-29 ≤ <i>l</i> ≤ 29                                              | -15 ≤ <i>h</i> ≤ 15<br>-20 ≤ <i>k</i> ≤ 20<br>-29 ≤ <i>l</i> ≤ 29                                              |
| No. of reflect. collected                               | 267036                                                                                                         | 234649                                                                                                         |
| Unique reflect.                                         | 18937                                                                                                          | 14631                                                                                                          |
| <i>R</i> <sub>int</sub>                                 | 0.0426                                                                                                         | 0.1279                                                                                                         |
| Data / restraints / params.                             | 20020 / 200 / 1274                                                                                             | 19037 / 195 / 1263                                                                                             |
| Goodness-of-fit on <i>F</i> <sup>2</sup>                | 1.230                                                                                                          | 1.192                                                                                                          |
| <i>R</i> 1 [ <i>I</i> > 2 $\sigma$ ( <i>I</i> )]        | 0.0584                                                                                                         | 0.0793                                                                                                         |
| <i>wR</i> 2 [ <i>I</i> > 2 $\sigma$ ( <i>I</i> )]       | 0.1201                                                                                                         | 0.1684                                                                                                         |
| <i>R</i> 1 [all data]                                   | 0.0610                                                                                                         | 0.1015                                                                                                         |
| <i>wR</i> 2 [all data]                                  | 0.1212                                                                                                         | 0.1771                                                                                                         |
| Largest diff. peak and hole max./min.[Å <sup>-3</sup> ] | 1.084 and -0.641                                                                                               | 0.577 and -0.795                                                                                               |



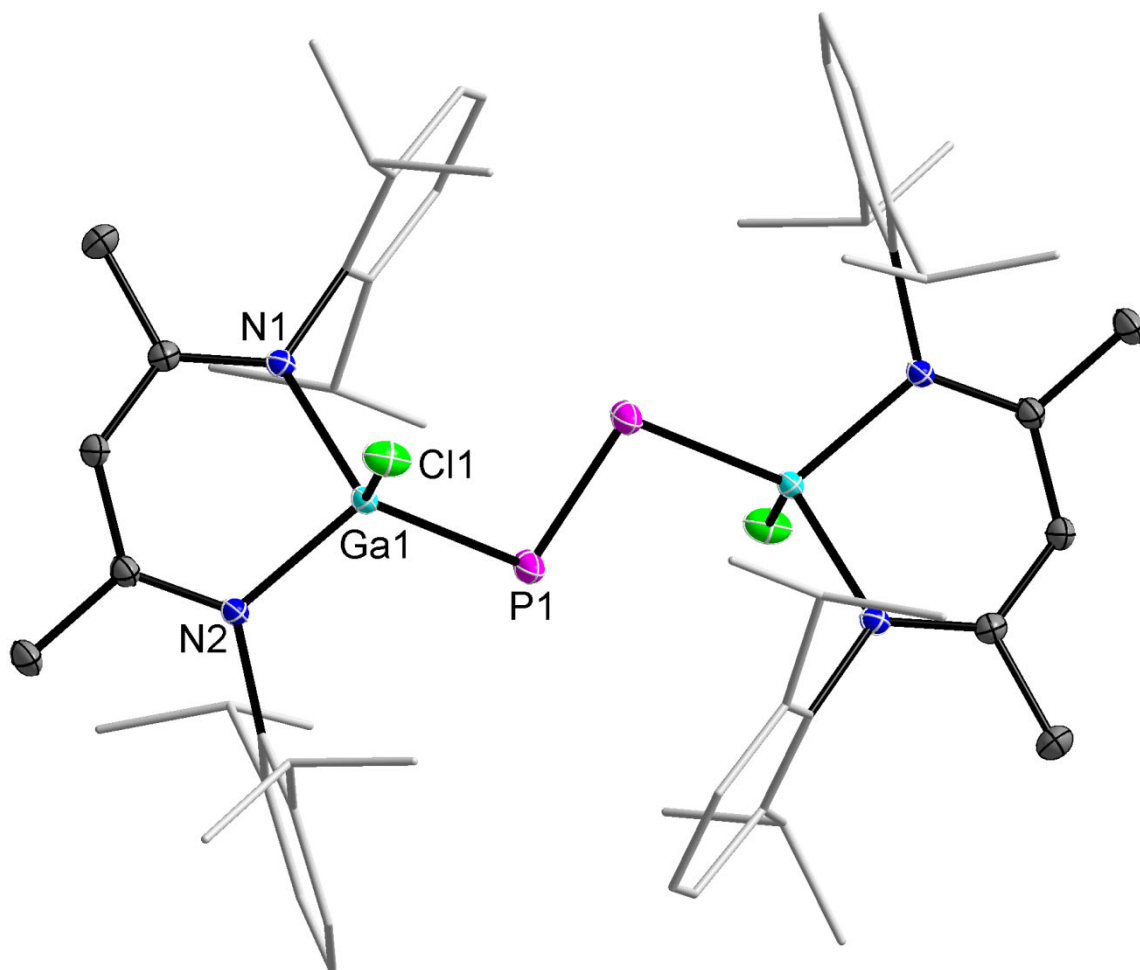

**Figure S39.** Molecular structure of **2a** with thermal ellipsoids at 50% probability level. The hydrogen atoms are omitted for clarity. Selected bond length (Å) and angles (°): Ga(1)–N(2) 1.9363(7), Ga(1)–N(1) 1.9436(7), Ga(1)–Cl(1) 2.2207(3), Ga(1)–P(1) 2.3131(3), P(1)–P(1)<sup>#1</sup> 2.0381(5); N(2)–Ga(1)–N(1) 97.40(3), N(2)–Ga(1)–Cl(1) 105.39(2), N(1)–Ga(1)–Cl(1) 103.88(2), N(2)–Ga(1)–P(1) 111.98(2), N(1)–Ga(1)–P(1) 118.22(2), Cl(1)–Ga(1)–P(1) 117.464(13), P(1)<sup>#1</sup>–P(1)–Ga(1) 95.182(18) <sup>#1</sup>coordinates used to generate equivalent atoms: -x,-y,-z+1.

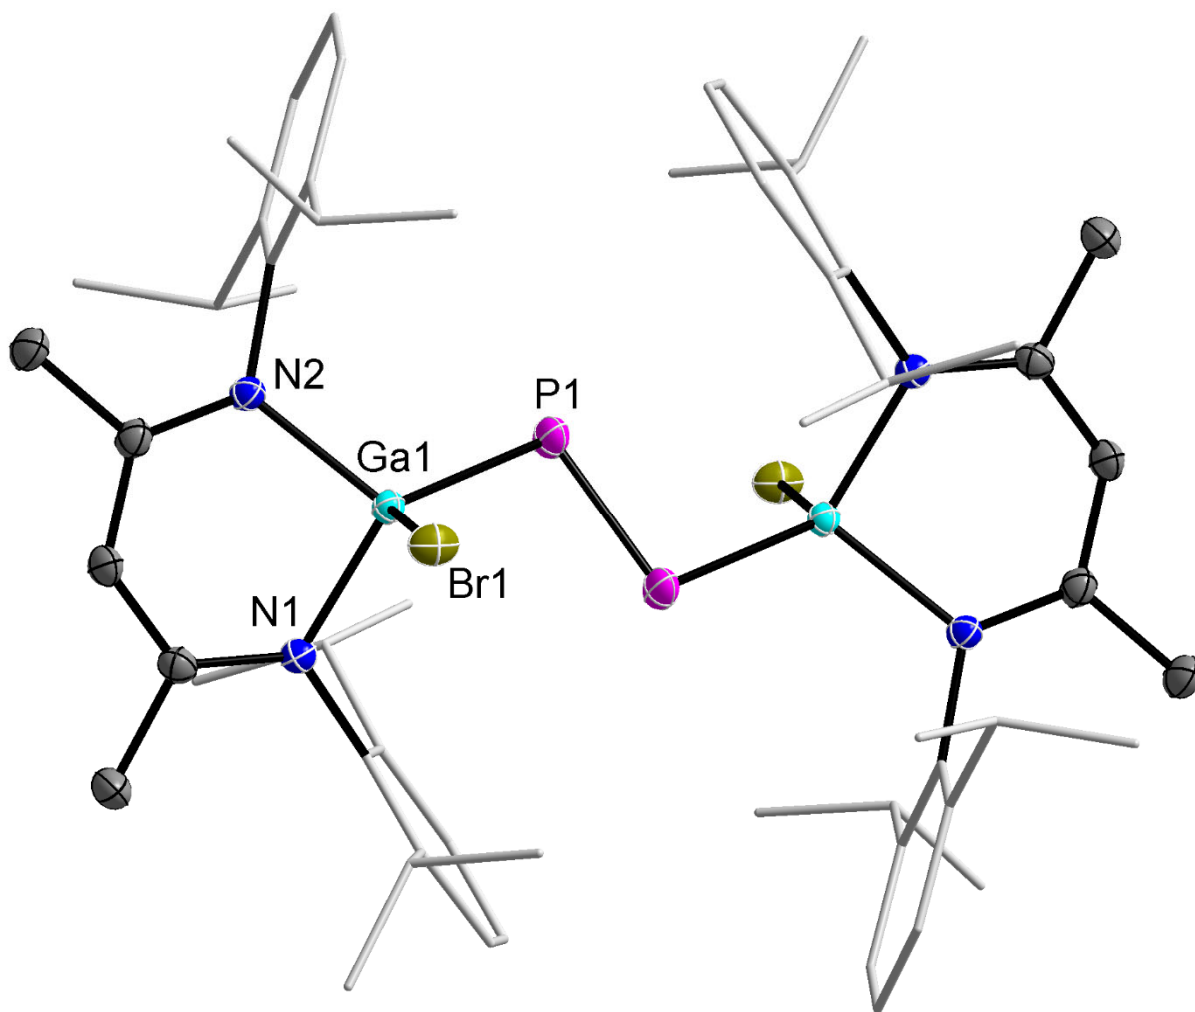

**Figure S40.** Molecular structure of **2b** with thermal ellipsoids at 50% probability level. The hydrogen atoms are omitted for clarity. Selected bond length (Å) and angles (°): Br(1)–Ga(1) 2.3680(2), Ga(1)–N(2) 1.9331(12), Ga(1)–N(1) 1.9439(12), Ga(1)–P(1) 2.3120(4), P(1)–P(1)<sup>#1</sup> 2.0282(8); N(2)–Ga(1)–N(1) 97.58(5), N(2)–Ga(1)–P(1) 112.51(3), N(1)–Ga(1)–P(1) 117.80(3), N(2)–Ga(1)–Br(1) 105.41(3), N(1)–Ga(1)–Br(1) 104.03(3), P(1)–Ga(1)–Br(1) 117.114(13), P(1)<sup>#1</sup>–P(1)–Ga(1) 94.92(2).

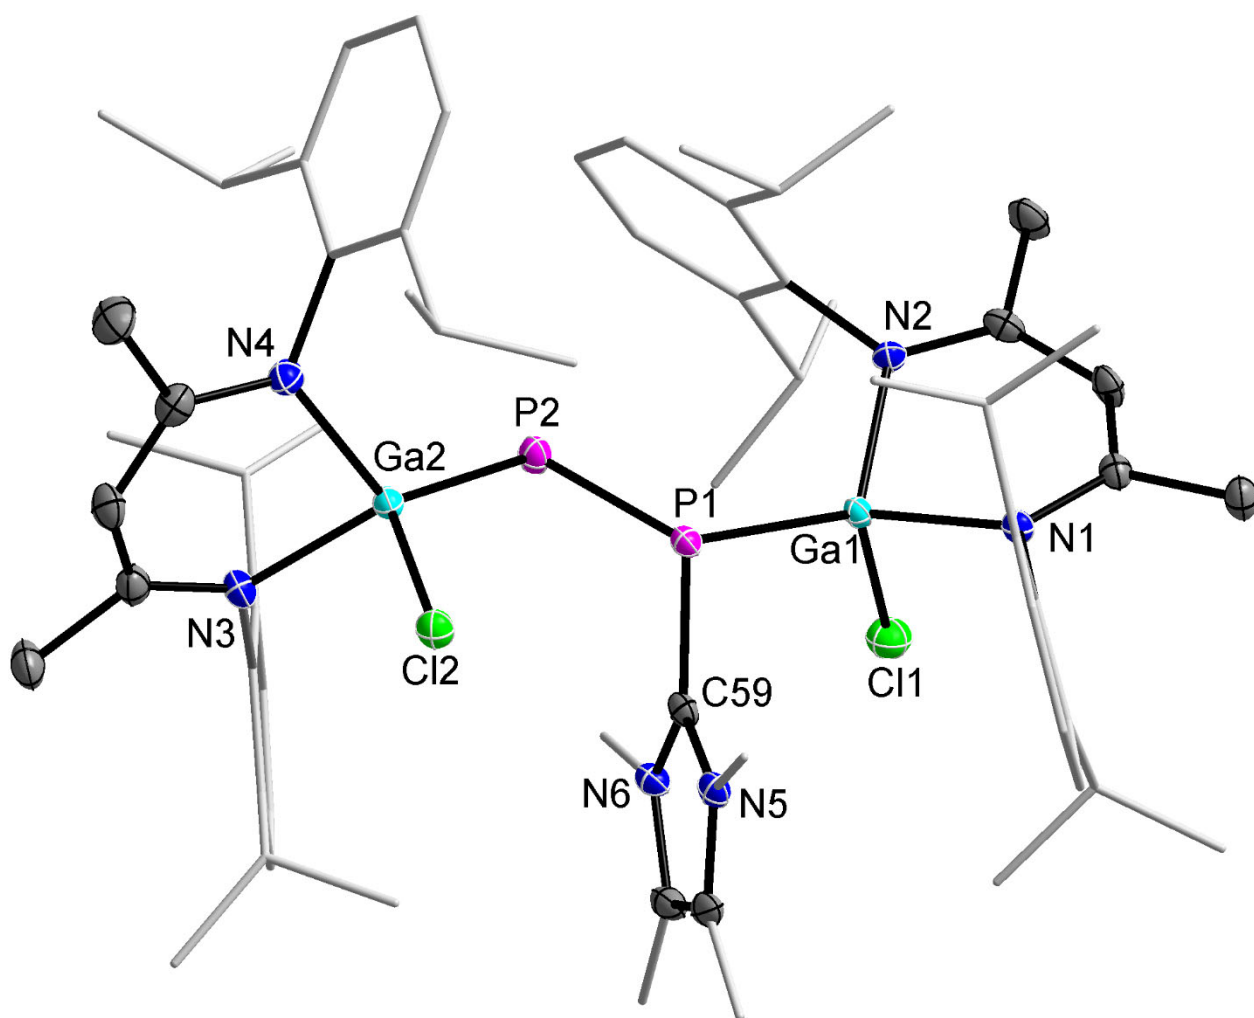

**Figure S41.** Molecular structure of **3a** with thermal ellipsoids at 50% probability level. The hydrogen atoms are omitted for clarity. Selected bond length (Å) and angles (°): (**molecule 1**) Ga(1)–N(1) 1.9506(16), Ga(1)–N(2) 1.9722(17), Ga(1)–Cl(1) 2.2249(6), Ga(1)–P(1) 2.3328(7), Ga(2)–N(3) 1.9851(17), Ga(2)–N(4) 2.0167(17), Ga(2)–Cl(2) 2.2590(7), Ga(2)–P(2) 2.2747(6), P(1)–C(59) 1.862(2), P(1)–P(2) 2.1871(8); N(1)–Ga(1)–N(2) 96.53(7), N(1)–Ga(1)–Cl(1) 101.43(5), N(2)–Ga(1)–Cl(1) 97.97(5), N(1)–Ga(1)–P(1) 120.93(5), N(2)–Ga(1)–P(1) 116.64(5), Cl(1)–Ga(1)–P(1) 118.81(2), N(3)–Ga(2)–N(4) 92.72(7), N(3)–Ga(2)–Cl(2) 101.85(5), N(4)–Ga(2)–Cl(2) 98.33(5), N(3)–Ga(2)–P(2) 121.02(5), N(4)–Ga(2)–P(2) 118.33(5), Cl(2)–Ga(2)–P(2) 119.33(2), C(59)–P(1)–P(2) 110.67(7), C(59)–P(1)–Ga(1) 95.21(6), P(2)–P(1)–Ga(1) 103.70(3), P(1)–P(2)–Ga(2) 95.93(3); (**molecule 2**) Ga(1)–N(2) 1.9551(16), Ga(1)–N(1) 1.9714(15), Ga(1)–Cl(1) 2.2113(6), Ga(1)–P(1) 2.3433(6), Ga(2)–N(4) 2.0023(17), Ga(2)–N(3) 2.0113(16), Ga(2)–Cl(2) 2.2579(6), Ga(2)–P(2) 2.2695(7), P(1)–C(59) 1.864(2), P(1)–P(2) 2.1835(8); N(1)–Ga(1)–N(2) 96.53(7), N(1)–Ga(1)–Cl(1) 101.43(5), N(2)–Ga(1)–Cl(1) 97.97(5), N(1)–Ga(1)–P(1) 120.93(5), N(2)–Ga(1)–P(1) 116.64(5), Cl(1)–Ga(1)–P(1) 118.81(2), N(3)–Ga(2)–N(4) 92.72(7), N(3)–Ga(2)–Cl(2) 101.85(5), N(4)–Ga(2)–Cl(2) 98.33(5), N(3)–Ga(2)–P(2) 121.02(5), N(4)–Ga(2)–P(2) 118.33(5), Cl(2)–Ga(2)–P(2) 119.33(2), C(59)–P(1)–P(2) 110.67(7), C(59)–P(1)–Ga(1) 95.21(6), P(2)–P(1)–Ga(1) 103.70(3), P(1)–P(2)–Ga(2) 95.93(3).

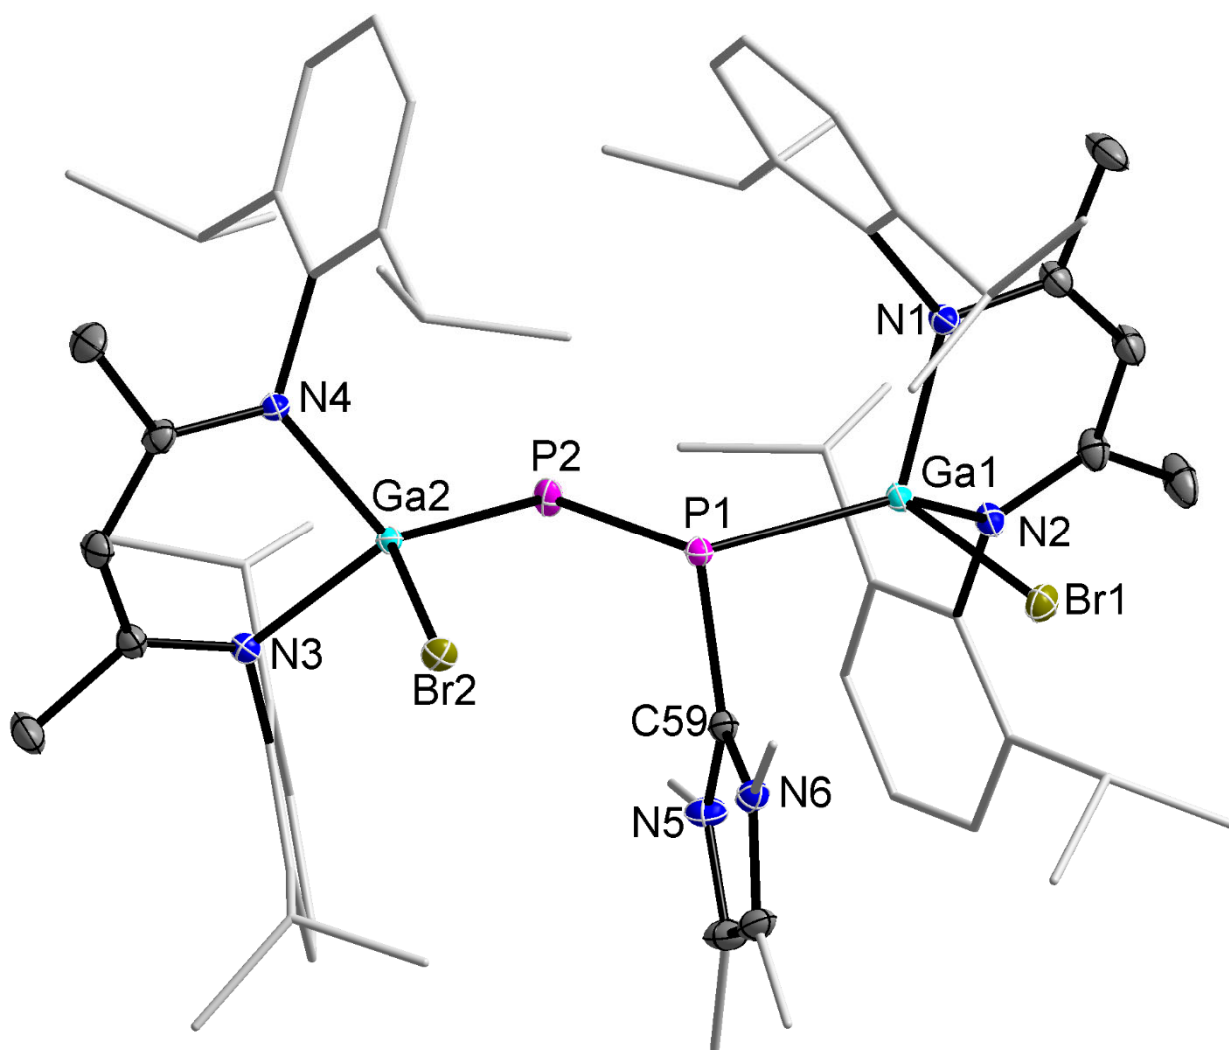

**Figure S42.** Molecular structure of **3b** with thermal ellipsoids at 50% probability level. The hydrogen atoms, and the alternate position of the disordered part are omitted for clarity. Selected bond length (Å) and angles (°): Br(1)–Ga(1) 2.3981(2), Br(2)–Ga(2) 2.4083(2), Ga(1)–N(1) 1.9513(11), Ga(1)–N(2) 1.9732(11), Ga(1)–P(1) 2.3205(4), Ga(2)–N(4) 1.9751(11), Ga(2)–N(3) 2.0028(11), Ga(2)–P(2) 2.2664(4), P(1)–C(59) 1.8570(13), P(1)–P(2) 2.1623(5); N(1)–Ga(1)–N(2) 96.36(5), N(1)–Ga(1)–P(1) 114.82(3), N(2)–Ga(1)–P(1) 134.28(4), N(1)–Ga(1)–Br(1) 102.46(4), N(2)–Ga(1)–Br(1) 100.16(4), P(1)–Ga(1)–Br(1) 104.349(11), N(4)–Ga(2)–N(3) 93.36(5), N(4)–Ga(2)–P(2) 121.61(3), N(3)–Ga(2)–P(2) 117.42(3), N(4)–Ga(2)–Br(2) 101.94(3), N(3)–Ga(2)–Br(2) 99.17(3), P(2)–Ga(2)–Br(2) 118.447(12), C(59)–P(1)–P(2) 110.55(5), C(59)–P(1)–Ga(1) 96.46(4), P(2)–P(1)–Ga(1) 113.099(18), P(1)–P(2)–Ga(2) 94.977(17).

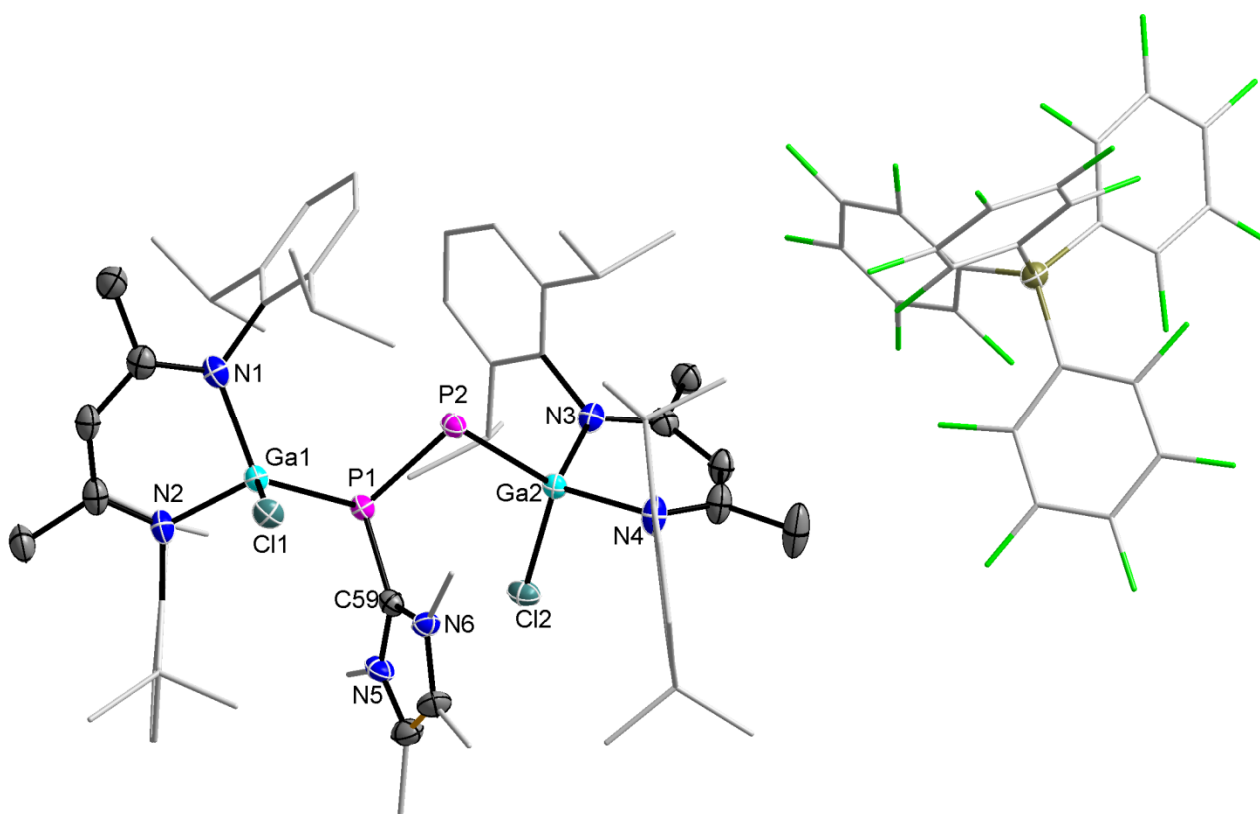

**Figure S43.** Molecular structure of **4a** with thermal ellipsoids at 50% probability level. The hydrogen atoms, a disordered solvent molecule (toluene), and the alternate position of the disordered part are omitted for clarity. Selected bond length (Å) and angles (°): Ga(1)–N(2) 1.9261(19), Ga(1)–N(1) 1.983(2), Ga(1)–Cl(1) 2.2021(10), Ga(1)–P(1) 2.3479(13), Ga(2)–N(3) 1.8686(18), Ga(2)–N(4) 1.9669(18), Ga(2)–Cl(2) 2.2074(10), Ga(2)–P(2) 2.3456(10), P(1)–C(59) 1.823(3), P(1)–P(2) 2.1423(8); N(2)–Ga(1)–N(1) 96.57(8), N(2)–Ga(1)–Cl(1) 106.28(6), N(1)–Ga(1)–Cl(1) 105.95(7), N(2)–Ga(1)–P(1) 112.02(7), N(1)–Ga(1)–P(1) 118.73(6), Cl(1)–Ga(1)–P(1) 115.17(6), N(3)–Ga(2)–N(4) 99.03(8), N(3)–Ga(2)–Cl(2) 105.72(6), N(4)–Ga(2)–Cl(2) 101.77(6), N(3)–Ga(2)–P(2) 108.10(6), N(4)–Ga(2)–P(2) 124.00(6), Cl(2)–Ga(2)–P(2) 115.82(5), C(59)–P(1)–P(2) 110.32(11), C(59)–P(1)–Ga(1) 102.17(9), P(2)–P(1)–Ga(1) 110.25(4), P(1)–P(2)–Ga(2) 100.12(3).

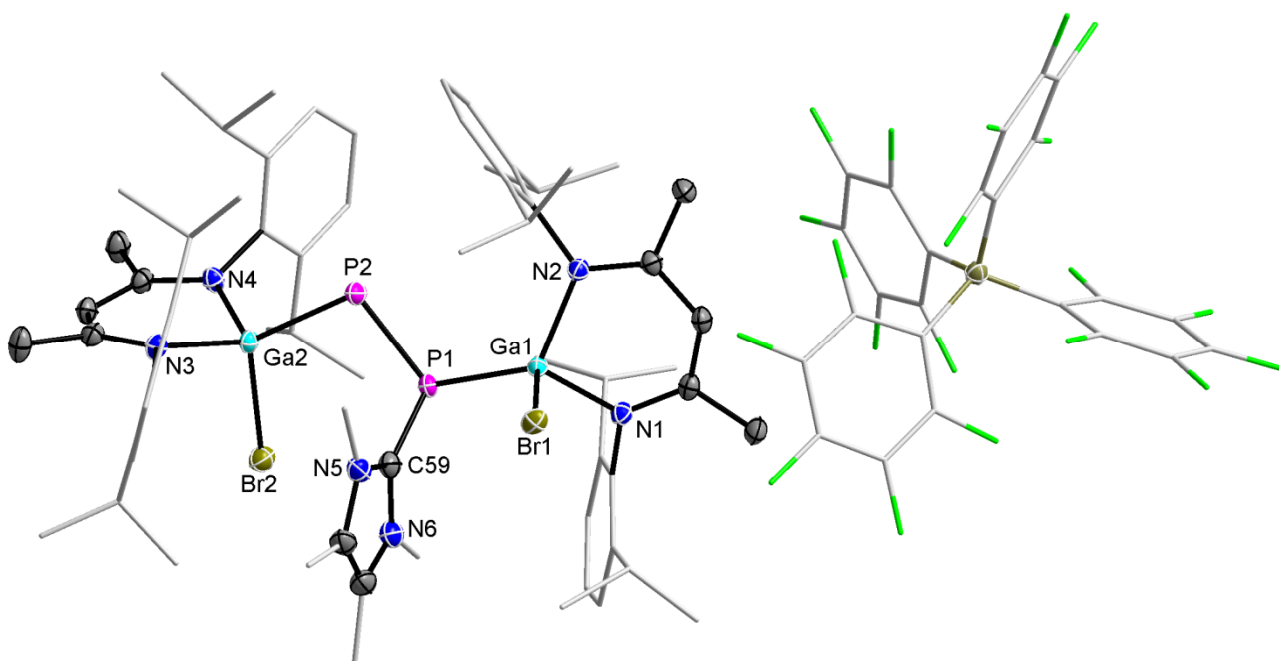

**Figure S44.** Molecular structure of **4b** with thermal ellipsoids at 50% probability level. The hydrogen atoms and the alternate position of the disordered part are omitted for clarity. Selected bond length (Å) and angles (°): Br(1)-Ga(1) 2.3498(5), Br(2)-Ga(2) 2.3403(6), Ga(1)-N(2) 1.9308(15), Ga(1)-N(1) 1.9422(15), Ga(1)-P(1) 2.3591(8), Ga(2)-N(4) 1.9336(15), Ga(2)-N(3) 1.9553(15), Ga(2)-P(2) 2.3522(7), P(1)-C(59) 1.8262(19), P(1)-P(2) 2.1336(7); N(2)-Ga(1)-N(1) 97.57(6), N(2)-Ga(1)-Br(1) 108.74(5), N(1)-Ga(1)-Br(1) 104.00(5), N(2)-Ga(1)-P(1) 119.49(5), N(1)-Ga(1)-P(1) 111.16(5), Br(1)-Ga(1)-P(1) 113.71(3), N(4)-Ga(2)-N(3) 96.91(6), N(4)-Ga(2)-Br(2) 105.42(5), N(3)-Ga(2)-Br(2) 104.47(5), N(4)-Ga(2)-P(2) 111.79(5), N(3)-Ga(2)-P(2) 120.45(5), Br(2)-Ga(2)-P(2) 115.40(2), C(59)-P(1)-P(2) 111.85(6), C(59)-P(1)-Ga(1) 100.18(6), P(2)-P(1)-Ga(1) 113.07(3), P(1)-P(2)-Ga(2) 101.59(3).

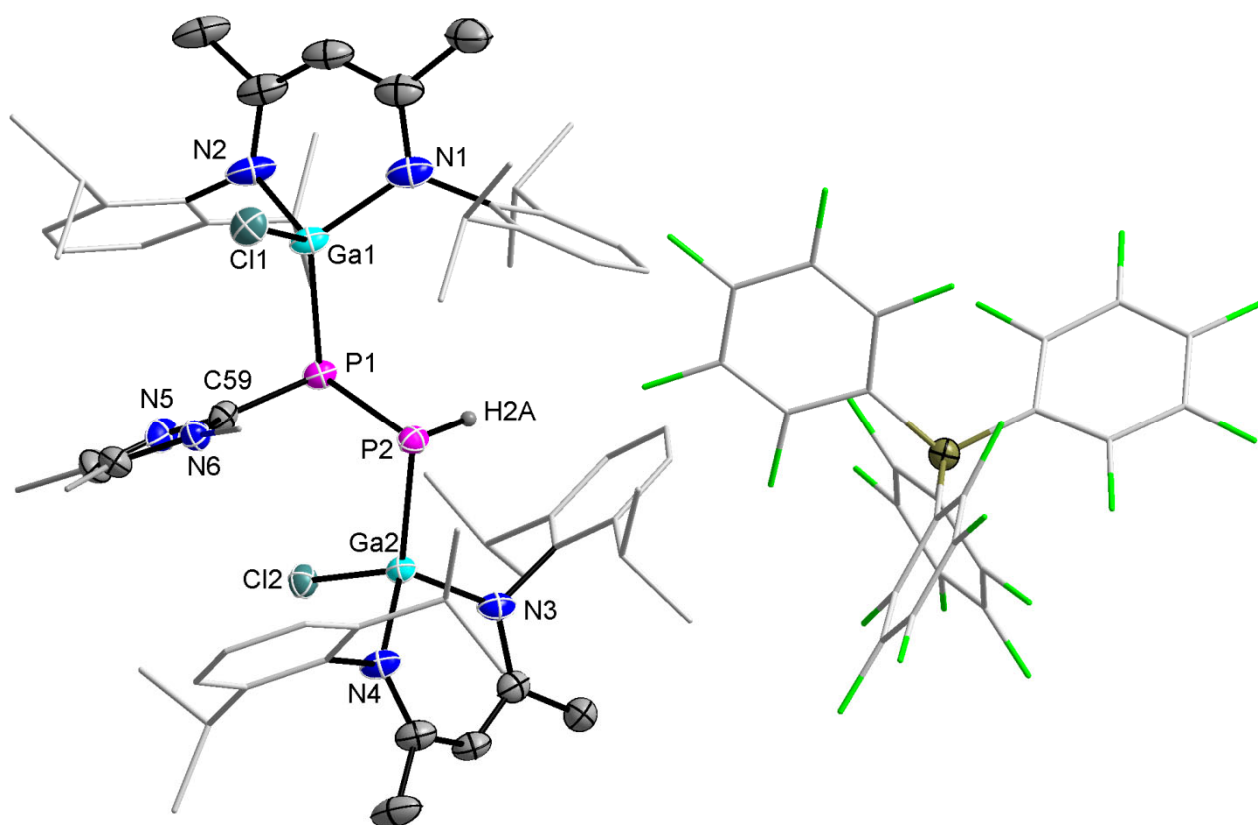

**Figure S45.** Molecular structure of **5a** with thermal ellipsoids at 50% probability level. The hydrogen atoms and the alternate position of the disordered part are omitted for clarity. Selected bond length (Å) and angles (°): Ga(1)-N(2) 1.913(3), Ga(1)-N(1) 1.991(3), Ga(1)-Cl(1) 2.2000(14), Ga(1)-P(1) 2.3655(16), Ga(2)-N(3) 1.860(3), Ga(2)-N(4) 1.988(3), Ga(2)-Cl(2) 2.2032(15), Ga(2)-P(2) 2.3466(16), P(1)-C(59) 1.838(4), P(1)-P(2) 2.2227(14), N(5)-C(59) 1.351(5), N(5)-C(60) 1.378(8), N(5)-C(62) 1.468(6), N(6)-C(59) 1.348(6); N(2)-Ga(1)-N(1) 96.48(14), N(2)-Ga(1)-Cl(1) 105.43(10), N(1)-Ga(1)-Cl(1) 104.99(10), N(2)-Ga(1)-P(1) 110.68(10), N(1)-Ga(1)-P(1) 118.85(9), Cl(1)-Ga(1)-P(1) 117.68(7), N(3)-Ga(2)-N(4) 98.82(12), N(3)-Ga(2)-Cl(2) 106.26(10), N(4)-Ga(2)-Cl(2) 102.64(9), N(3)-Ga(2)-P(2) 114.16(9), N(4)-Ga(2)-P(2) 118.06(10), Cl(2)-Ga(2)-P(2) 114.93(7), C(59)-P(1)-P(2) 103.18(16), C(59)-P(1)-Ga(1) 99.66(14), P(2)-P(1)-Ga(1) 107.23(6), P(1)-P(2)-Ga(2) 99.12(5), N(6)-C(59)-P(1) 132.6(4), N(5)-C(59)-P(1) 121.3(4).

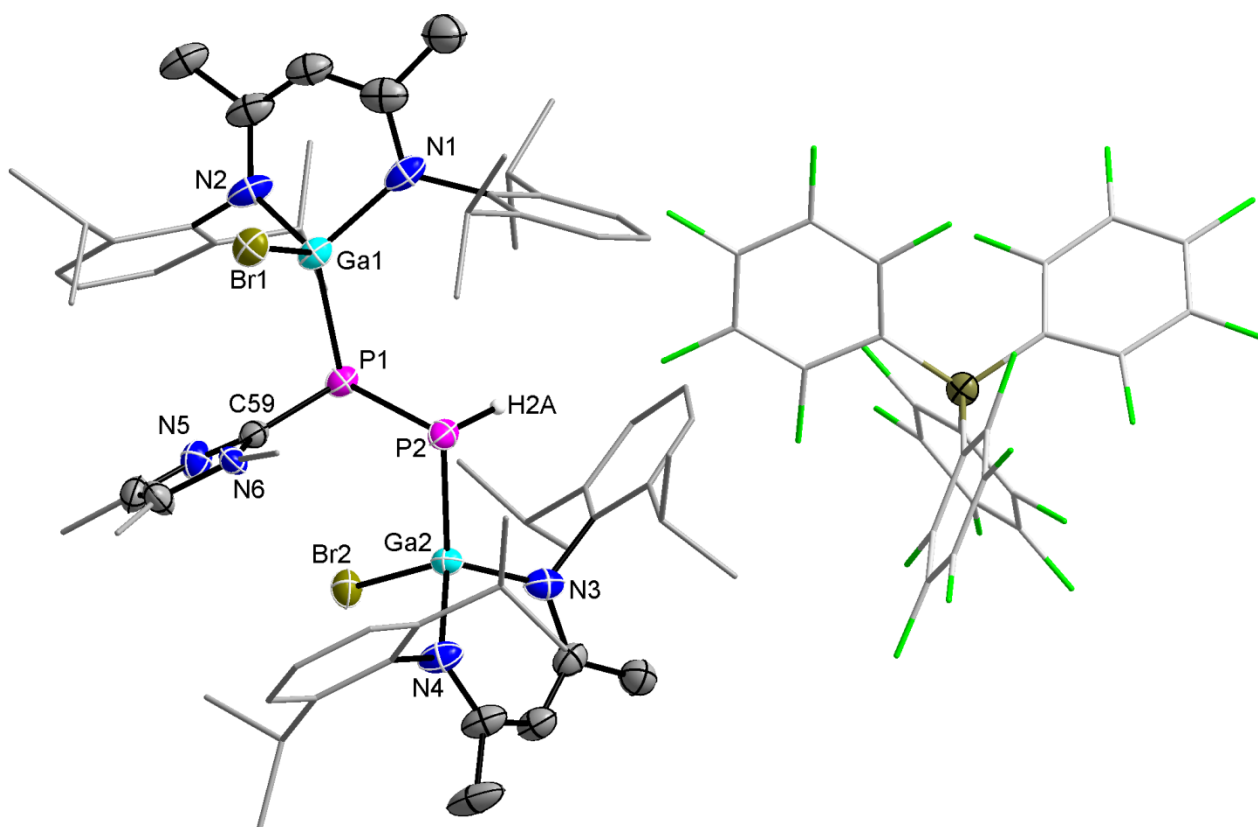

**Figure S46.** Molecular structure of **5b** with thermal ellipsoids at 50% probability level. The hydrogen atoms and the alternate position of the disordered part are omitted for clarity. Selected bond length (Å) and angles (°): Ga(1)-N(2) 1.914(5), Ga(1)-N(1) 2.007(6), Ga(1)-Br(1) 2.356(2), Ga(1)-P(1) 2.367(3), Ga(2)-N(3) 1.859(6), Ga(2)-N(4) 2.004(6), Ga(2)-P(2) 2.339(3), Ga(2)-Br(2) 2.354(2), P(1)-C(59) 1.829(8), P(1)-P(2) 2.223(3), N(5)-C(59) 1.340(10), N(5)-C(60) 1.387(10), N(5)-C(62) 1.452(9), N(6)-C(59) 1.54(9); N(2)-Ga(1)-N(1) 96.3(2), N(2)-Ga(1)-Br(1) 105.73(17), N(1)-Ga(1)-Br(1) 104.58(17), N(2)-Ga(1)-P(1) 110.26(19), N(1)-Ga(1)-P(1) 118.78(17), Br(1)-Ga(1)-P(1) 118.34(11), N(3)-Ga(2)-N(4) 98.9(2), N(3)-Ga(2)-P(2) 113.78(18), N(4)-Ga(2)-P(2) 117.50(19), N(3)-Ga(2)-Br(2) 106.04(19), N(4)-Ga(2)-Br(2) 102.13(18), P(2)-Ga(2)-Br(2) 116.34(13), C(59)-P(1)-P(2) 104.1(3), C(59)-P(1)-Ga(1) 98.9(3), P(2)-P(1)-Ga(1) 107.51(11), P(1)-P(2)-Ga(2) 99.43(11), N(5)-C(59)-P(1) 121.2(6), N(6)-C(59)-P(1) 131.9(6).



## 6. Computational Details

All quantum chemical calculations were performed using the program package ORCA 5.03. The structural optimizations were done using the B3LYP (12-15) functional and a def2-TZVP basis set<sup>9-16</sup> while the subsequent spin and EPR analyses included relativistic effects using the Zero Order Regular Approximation (ZORA)<sup>17</sup>. The calculations include atom pairwise dispersion correction<sup>18,19</sup> Natural Population Analysis was performed using the NBO7.0 Program (NBO7.0) in combination with ORCA4.2.1.<sup>20</sup>

**Table S4.** Calculated (selected) bond distances (Å) and angles (°) of compounds **2a-b**, **3a-b**, and **4a-b**.

| Bond/Angle    | <b>2a</b> | <b>2b</b> | <b>3a</b> | <b>3b</b> | <b>4a</b> | <b>4b</b> |
|---------------|-----------|-----------|-----------|-----------|-----------|-----------|
| P1=P2         | 2.040     | 2.040     | 2.158     | 2.158     | 2.130     | 2.133     |
| Ga1-P1        | 2.332     | 2.333     | 2.325*    | 2.327*    | 2.358*    | 2.359*    |
| Ga2-P2        | 2.334     | 2.333     | 2.280     | 2.280     | 2.354     | 2.357     |
| P1-C59        |           |           | 1.852     | 1.852     | 1.816     | 1.817     |
| Ga1-P1-P2     | 95.8      | 95.3      | 111.6*    | 111.0*    | 119.5*    | 118.1*    |
| P1-P2-Ga2     | 94.9      | 95.3      | 93.7      | 94.0      | 99.6      | 100.3     |
| Ga1-P1-C59    |           |           | 96.0      | 96.5      | 99.5      | 99.9      |
| *carbene side |           |           |           |           |           |           |

**Table S5.** Mayer and Löwdin bond orders (in parenthesis) of compounds **2a-b**, **3a-b**, and **4a-b**.

| Bond          | <b>2a</b>          | <b>2b</b>          | <b>3a</b>            | <b>3b</b>            | <b>4a</b>            | <b>4b</b>            |
|---------------|--------------------|--------------------|----------------------|----------------------|----------------------|----------------------|
| P1=P2         | 1.8810<br>(2.0810) | 1.8830<br>(2.0849) | 1.2075<br>(1.4480)   | 1.2193<br>(1.4461)   | 1.2938<br>(1.4820)   | 1.2534<br>(1.4746)   |
| Ga1-P1        | 0.9573<br>(1.2032) | 0.9632<br>(1.2067) | 0.9295*<br>(1.1291*) | 0.9346*<br>(1.1275*) | 0.8369*<br>(1.0189*) | 0.8718*<br>(1.0194*) |
| Ga2-P2        | 0.9506<br>(1.2093) | 0.9628<br>(1.2066) | 1.1797<br>(1.4726)   | 1.1647<br>(1.4728)   | 0.9554<br>(1.1927)   | 0.9781<br>(1.1920)   |
| P1-C59        |                    |                    | 1.0712<br>(1.2002)   | 1.0670<br>(1.1960)   | 1.0013<br>(1.1979)   | 1.0268<br>(1.2004)   |
| *carbene side |                    |                    |                      |                      |                      |                      |

**Table S6.** Natural population analysis (NPA) atomic charges of compounds **2a-b**, **3a-b**, and **4a-b**.

| atom            | 2a       | 2b       | 3a        | 3b        | 4a        | 4b        |
|-----------------|----------|----------|-----------|-----------|-----------|-----------|
| P1              | -0.31175 | -0.30720 | -0.09235* | -0.09188* | -0.04921* | -0.04625* |
| P2              | -0.31816 | -0.30720 | -0.84128  | -0.83266  | -0.33600  | -0.32474  |
| Ga1             | 1.41333  | 1.33854  | 1.45620*  | 1.39219*  | 1.48556*  | 1.41174*  |
| Ga2             | 1.41224  | 1.33854  | 1.37116   | 1.30478   | 1.42213   | 1.34646   |
| C (carbene)     |          |          | 0.16318   | 0.16437   | 0.16668   | 0.16319   |
| N1<br>(carbene) |          |          | -0.31110  | -0.31191  | -0.30599  | -0.30681  |
| N2<br>(carbene) |          |          | -0.30965  | -0.30810  | -0.28370  | -0.28485  |
| *carbene side   |          |          |           |           |           |           |

**Table S7.** FMO energies as well as the HOMO-LUMO gap of compounds **2a**, **2b**, **3a**, and **3b** calculated at M06-2X/def2-TZVPP//def2-SVP level of theory.

| Orbital       | Energy / eV |       |       |       |
|---------------|-------------|-------|-------|-------|
|               | 2a          | 2b    | 3a    | 3b    |
| HOMO          | -5.22       | -5.26 | -3.91 | -3.95 |
| LUMO          | -2.37       | -2.44 | -1.34 | -1.37 |
| HOMO-LUMO gap | -7.60       | -7.70 | -5.25 | -5.32 |

**Table S8.** Calculated *g*-tensor and hyperfine coupling constants (*A* in MHz) for the radical cations **4a** and **4b** calculated at the ZORA B3LYP D3BJ def2-tzvp level of theory.

|                  | 4a       |          |          |       | 4b       |          |          |       |
|------------------|----------|----------|----------|-------|----------|----------|----------|-------|
|                  | <i>x</i> | <i>y</i> | <i>z</i> | iso   | <i>x</i> | <i>y</i> | <i>z</i> | iso   |
| <i>g</i> -tensor | 1.997    | 2.004    | 2.019    | 2.006 | 2.000    | 2.002    | 2.016    | 2.006 |
| <i>A</i> (P1)    | 263.1    | 274.7    | 426.9    | 321.6 | 263.2    | 275.1    | 421.3    | 319.9 |
| <i>A</i> (P2)    | -126.9   | -145.8   | 594.7    | 107.4 | -129.0   | -147.8   | 598.8    | 107.3 |
| <i>A</i> (Ga1)   | 83.2     | 84.2     | 97.4     | 88.3  | 84.1     | 84.8     | 97.5     | 88.8  |
| <i>A</i> (Ga2)   | -26.8    | -43.0    | -46.1    | -38.6 | -29.7    | -45.7    | -48.9    | -41.4 |

**Table S9.** Mulliken spin populations of the radical cations **4a** and **4b**.

|                    | 4a     | 4b     |
|--------------------|--------|--------|
| P1                 | 0.122  | 0.117  |
| P2                 | 0.797  | 0.804  |
| Ga1                | 0.016  | 0.015  |
| Ga2                | -0.006 | -0.007 |
| C59 <sub>NHC</sub> | 0.019  | 0.019  |
| N1 <sub>NHC</sub>  | 0.004  | 0.004  |
| N2 <sub>NHC</sub>  | 0.010  | 0.010  |

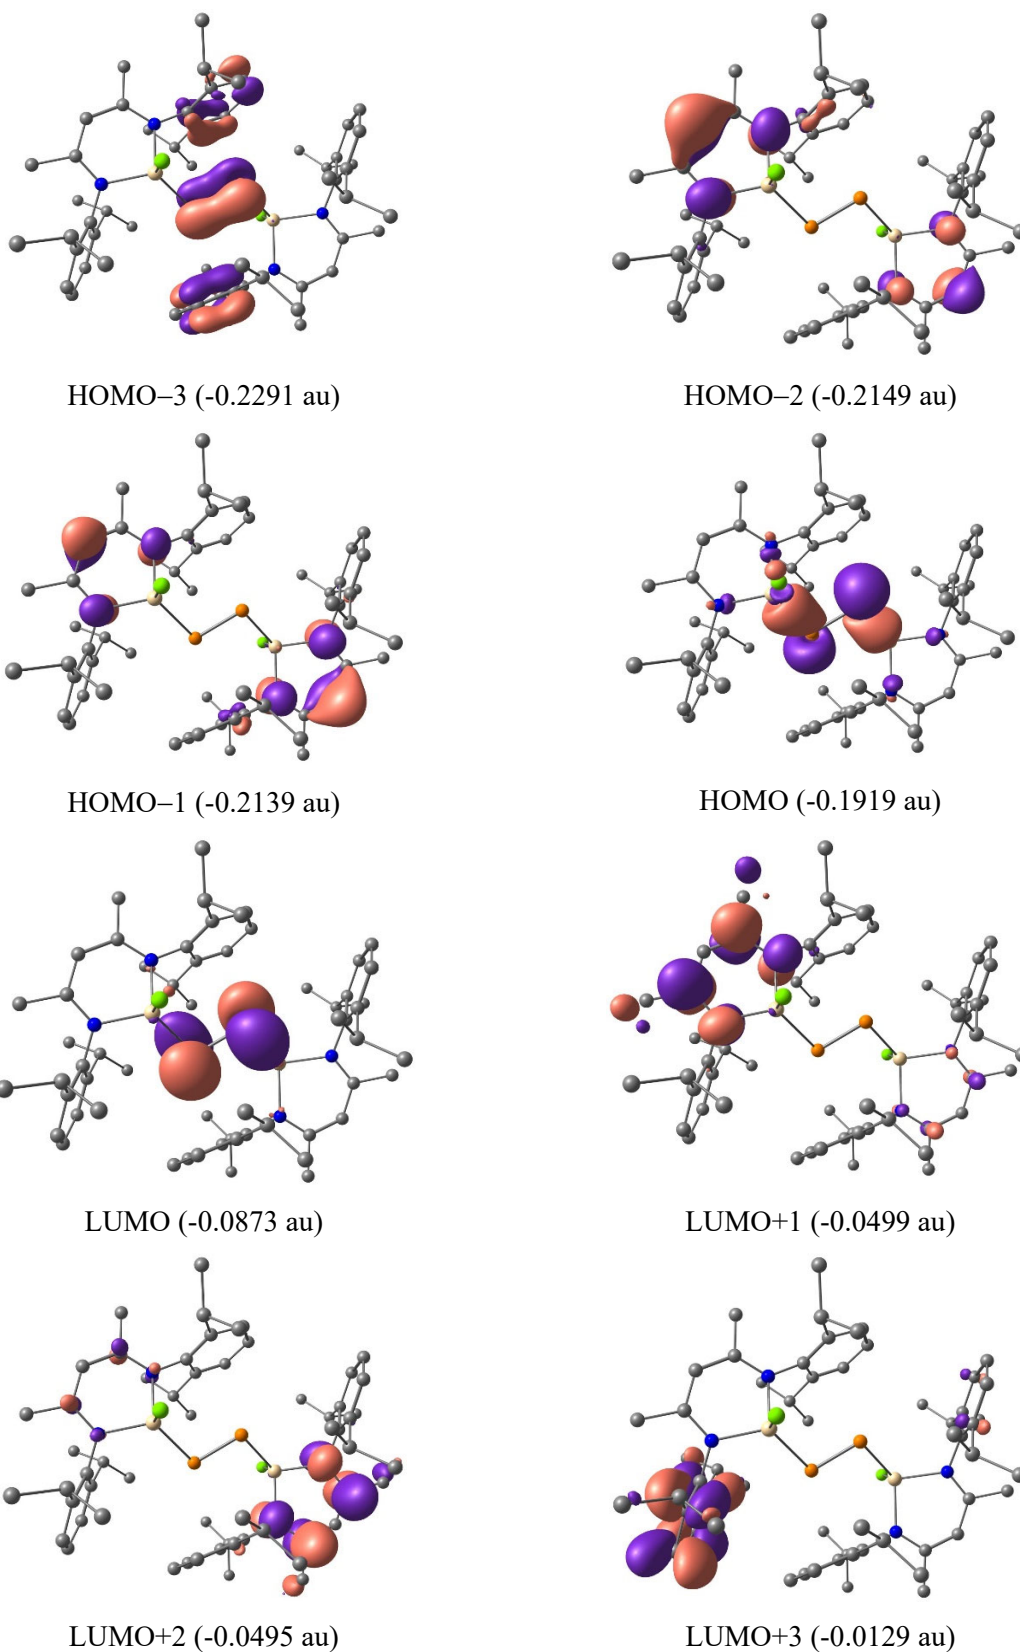

**Figure S47.** Selected molecular orbitals (from HOMO-3 to LUMO+3) of compound **2a** calculated at M06-2X/def2-TZVPP//def2-SVP. The isovalue was arbitrarily chosen to be 0.0432. Hydrogen atoms were omitted for clarity reasons.

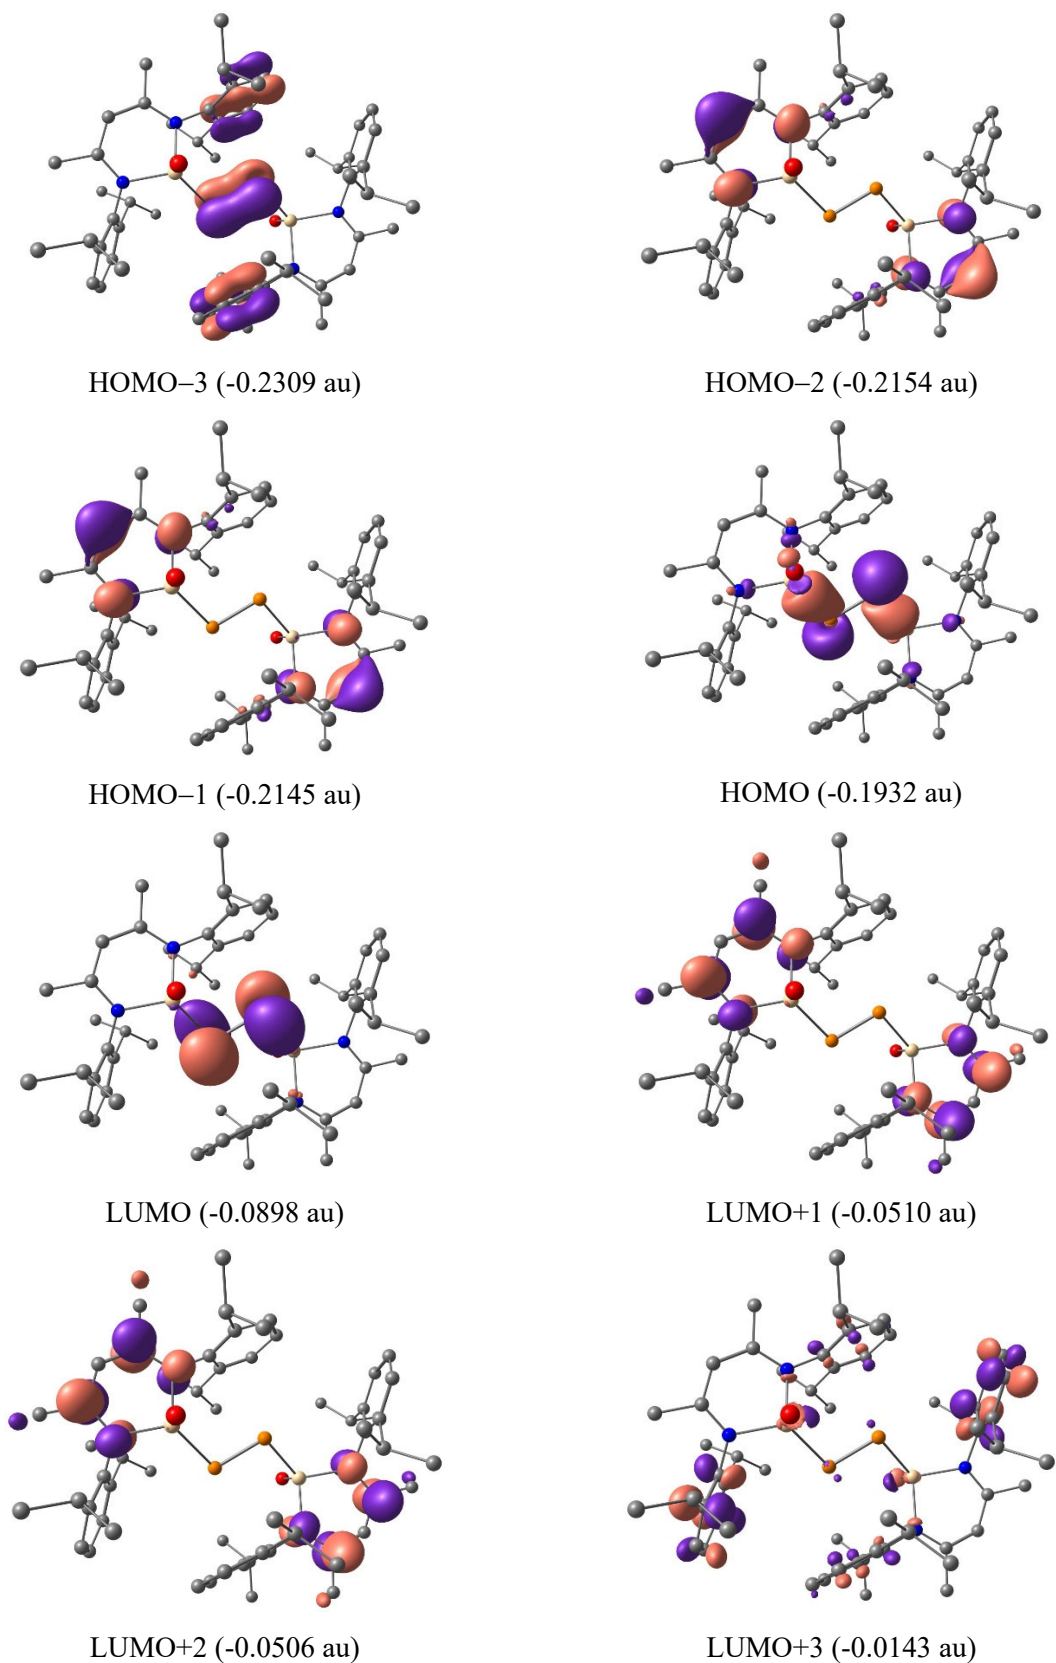

**Figure S48.** Selected molecular orbitals (from HOMO-3 to LUMO+3) of compound **2b** calculated at M06-2X/def2-TZVPP//def2-SVP. The isovalue was arbitrarily chosen to be 0.0432. Hydrogen atoms were omitted for clarity reasons.

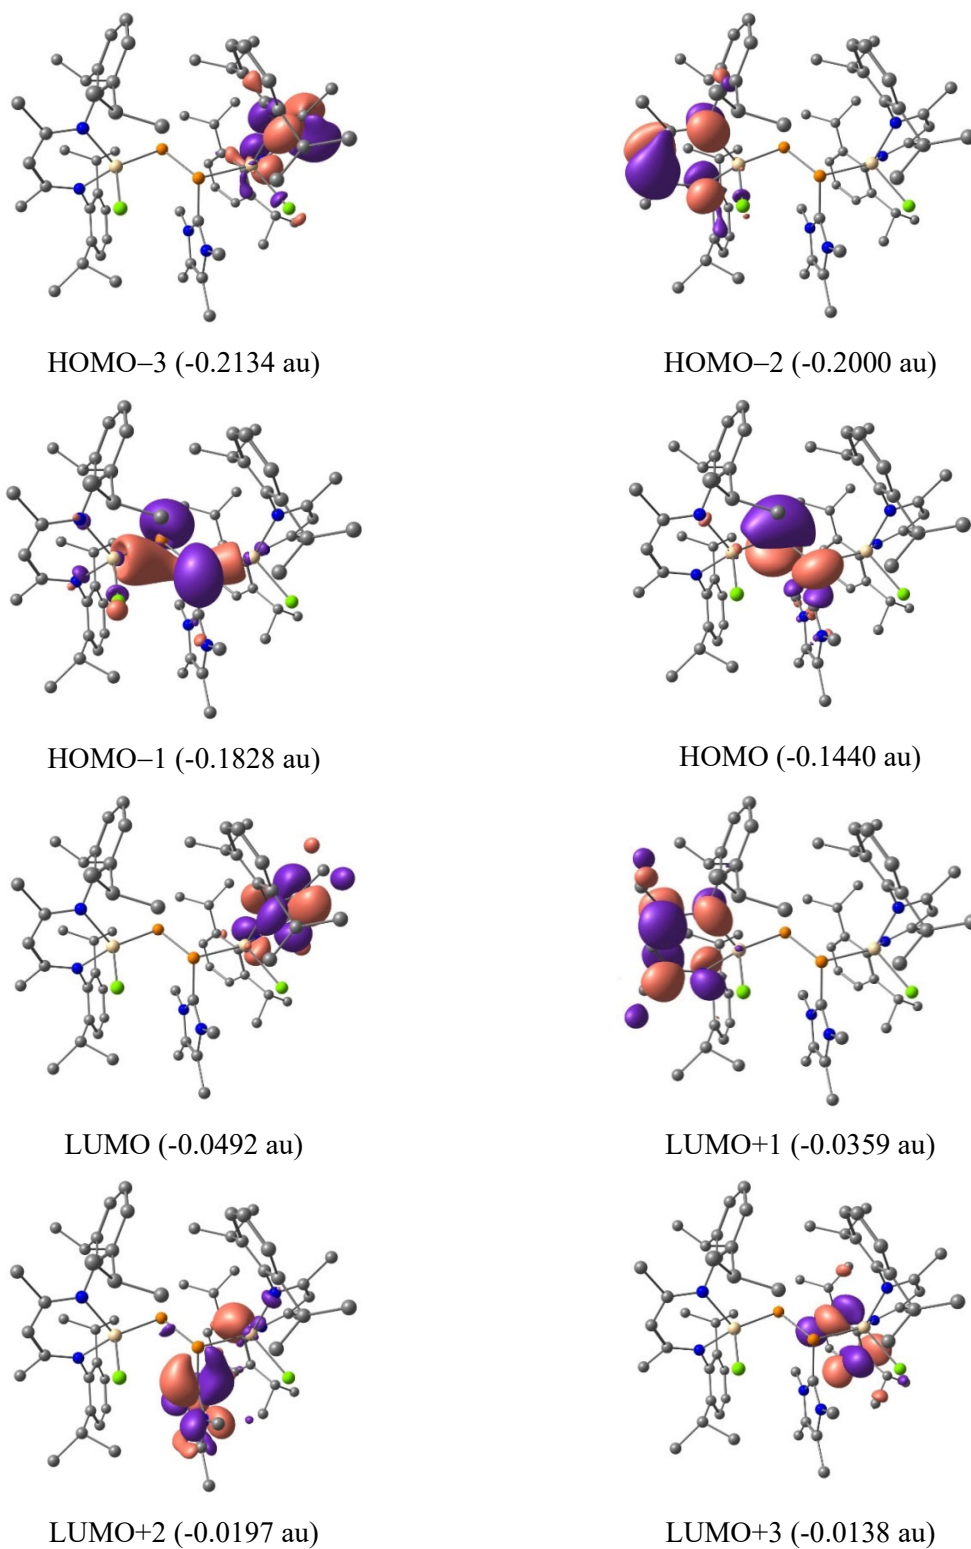

**Figure S49.** Selected molecular orbitals (from HOMO-3 to LUMO+3) of compound **3a** calculated at M06-2X/def2-TZVPP//def2-SVP. The isovalue was arbitrarily chosen to be 0.0432. Hydrogen atoms were omitted for clarity reasons.

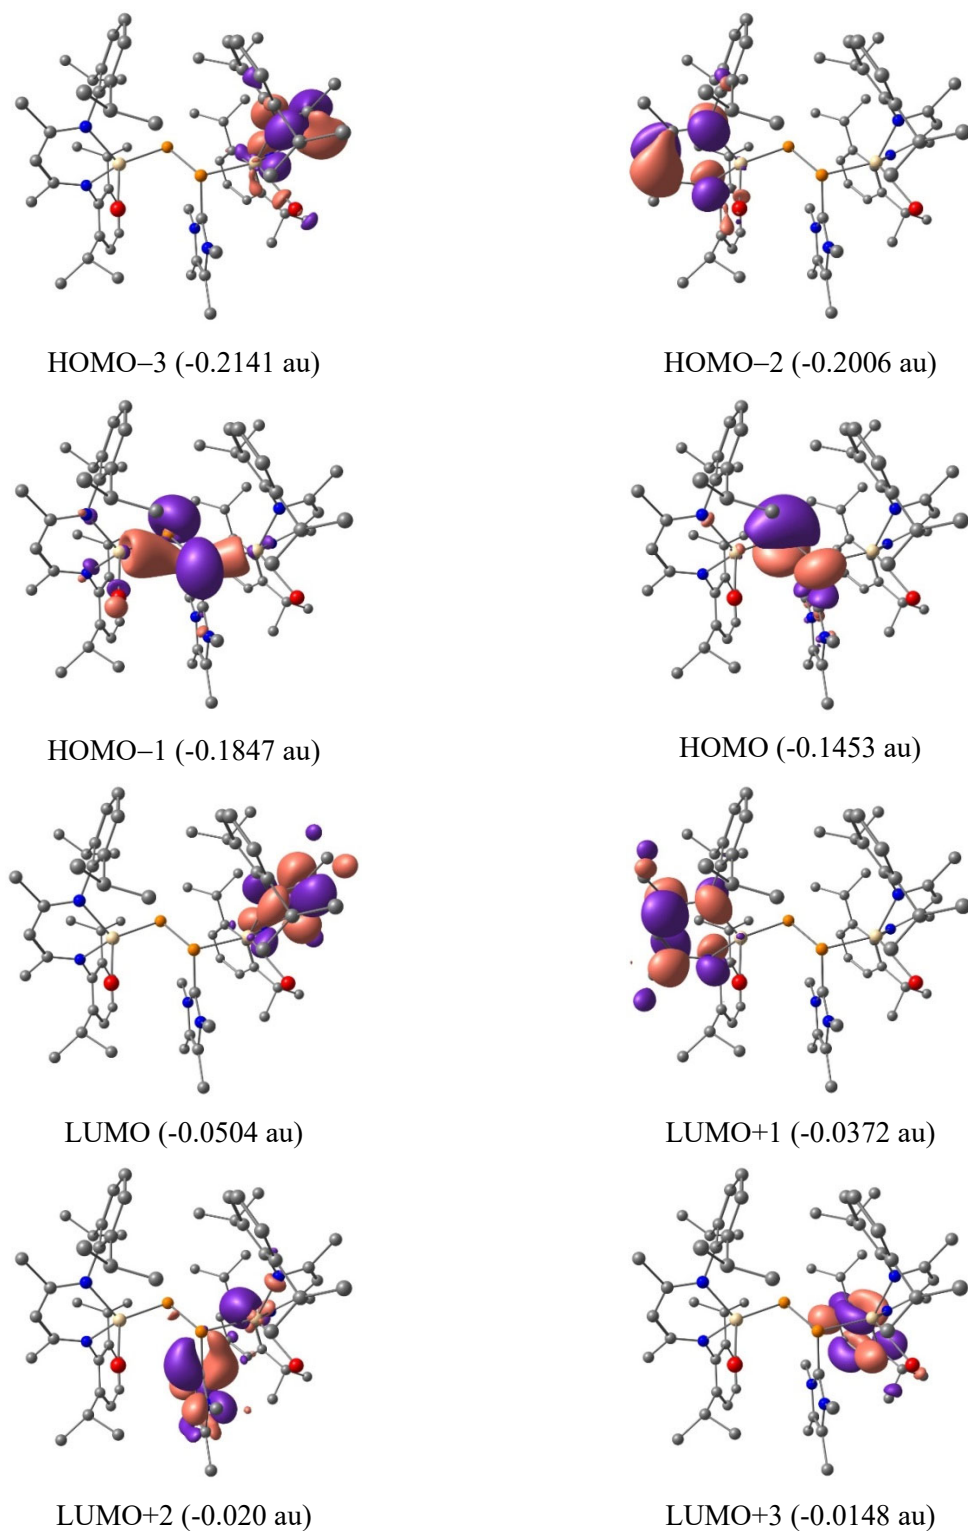

**Figure S50.** Selected molecular orbitals (from HOMO-3 to LUMO+3) of compound **3b** calculated at M06-2X/def2-TZVPP//def2-SVP. The isovalue was arbitrarily chosen to be 0.0432. Hydrogen atoms were omitted for clarity reasons.

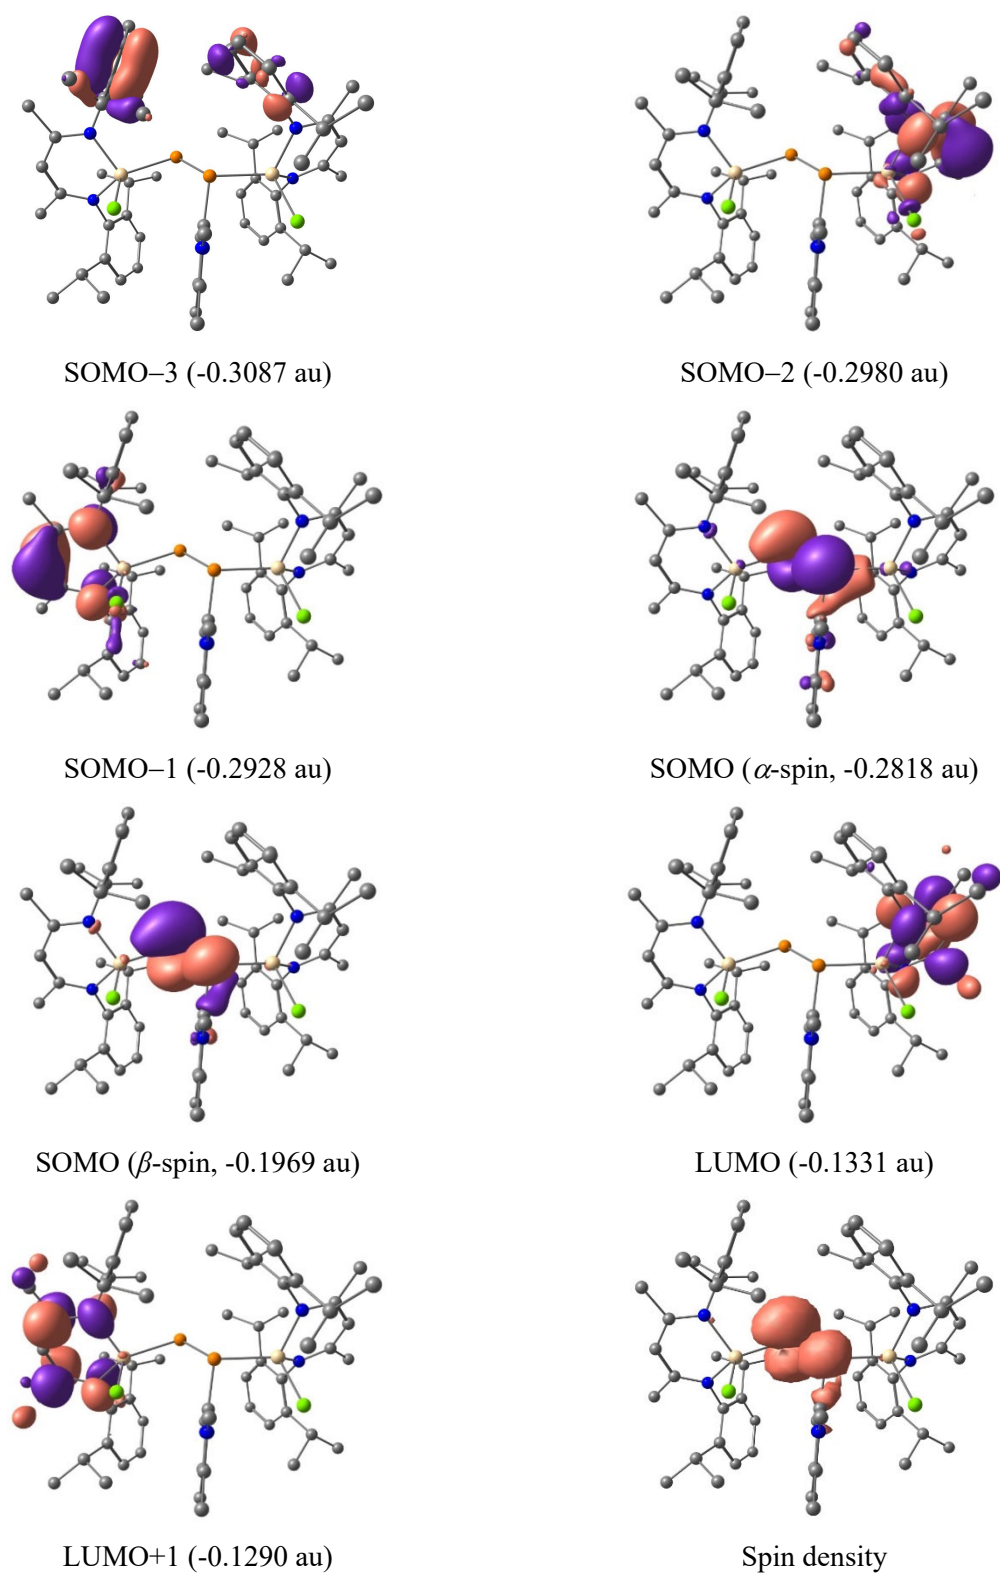

**Figure S51.** Selected molecular orbitals (from SOMO-3 to LUMO+1) and spin density plot of compound **4a** calculated at M06-2X/def2-TZVPP//def2-SVP. The isovalue was arbitrarily chosen to be 0.0432. Hydrogen atoms were omitted for clarity reasons.

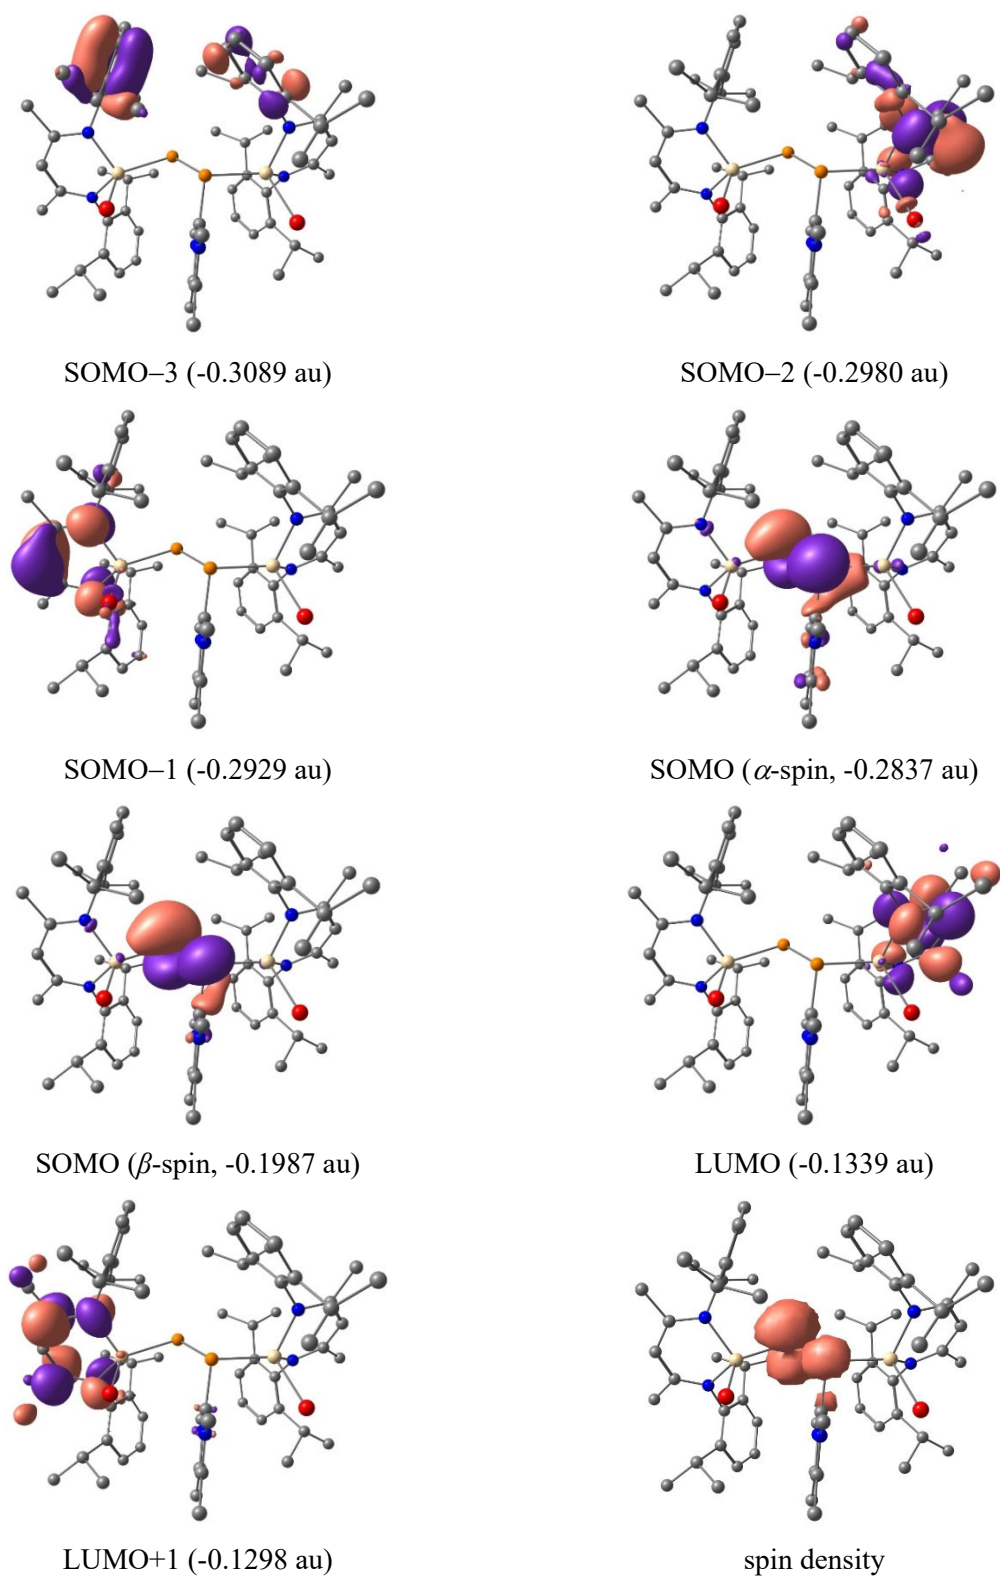

**Figure S52.** Selected molecular orbitals (from SOMO-3 to LUMO+1) and spin density plot of compound **4b** calculated at M06-2X/def2-TZVPP//def2-SVP. The isovalue was arbitrarily chosen to be 0.0432. Hydrogen atoms were omitted for clarity reasons.



## 6. EPR Spectroscopy

X-band CW EPR spectra were obtained using an X-band Bruker Elexsys E500 EPR spectrometer equipped with a ER4116DM dual mode resonator and an ESR 900 He cryostat. EPR spectra at 290 K were obtained using a microwave frequency of  $\sim 9.64$  GHz, microwave power of 20 mW, 100 mT field sweep centered at 340 mT, a Lock-In modulation amplitude of 0.1 mT, a time constant of 40.96 ms, a sweep time of 83.89 s with 10 averages and a modulation frequency of 100 KHz. The temperature was stabilized at 80 K for low temperature measurements using a He flow cryostat (Oxford Instruments). The EPR spectra at 80 K were obtained under identical conditions using same parameters with an exception of 120 mT sweep width, 0.3 mT of modulation amplitude and 5 averages.

Q-band pulse EPR measurements were performed using a Bruker Elexsys E580 EPR X-band Spectrometer with homebuilt Q-band extension capable to deliver 34 GHz microwave pulses up to 10W. The experiments were conducted in a homebuilt Q-band Pulse-ENDOR resonator.<sup>21</sup> Electron spin echo (ESE)-detected field-swept spectra were measured at 40 K using the pulse sequence:  $t_p$ - $\tau$ - $2t_p$ - $\tau$ -echo with typical values  $t_p=20$  ns,  $\tau=240$  ns, repetition time 5ms.

W-band pulse EPR measurements were performed using a Bruker ELEXSYS E680 spectrometer equipped with a homebuilt W-band extension and a cryogen free Cryogenic 6 T magnet with a variable temperature insert. ESE-detected field-swept spectra were measured at 32 K using the pulse sequence:  $t_p$ - $\tau$ - $2t_p$ - $\tau$ -echo with typical values  $t_p=20$  ns,  $\tau=260$  ns, repetition time 5ms. Small hyperfine couplings were detected using the Mims ENDOR sequence  $t_p$ - $\tau$ - $t_p$ - $T_{RF}$ - $t_p$ - $\tau$ -echo. With  $T_{RF} = 20$   $\mu$ s. ELDOR detected NMR experiments aimed at uncovering large hyperfine couplings were performed at 32 K using the sequence  $T_{HTA}$ - $t_p$ - $\tau$ - $2t_p$ - $\tau$ -echo, with  $T_{HTA}$  (variable ELDOR frequency pulse) of 800 ns. However, the phosphorus couplings were larger than the bandwidth of the resonator, and no clear resonance signals could be observed.

All the simulations were obtained using Easyspin<sup>22</sup> 5.2.30 with the function “pepper” and “garlic” for low temperature and room temperature spectra, respectively. Both complexes **4a** and **4b** showed identical X-band CW EPR spectra with a small variation in their line widths and therefore were simulated using identical spin Hamiltonian parameters. The negative signs were introduced to the hyperfine coupling values in spin-Hamiltonian parameters from the complementary computational calculations (Table S8) and to match the isotropic values obtained from liquid solution simulations. The discrepancy in the simulation parameters between RT and 80 K results from fact that the low temperature simulations require a very large number of parameters, which are strongly correlated. Therefore, it may be difficult to obtain a unique solution. Nevertheless, the spin-Hamiltonian parameters obtained from the simulations are in good agreement with the parameters calculated using computational calculations (Table S9).

**Table S10.** Spin Hamiltonian parameters obtained from the simulation of X-band EPR spectra and calculated from the computational calculations for the radicals **4a** and **4b**.

|                        |             | <b>4a</b> |          |          |       | <b>4b</b> |          |          |       |
|------------------------|-------------|-----------|----------|----------|-------|-----------|----------|----------|-------|
|                        |             | <i>x</i>  | <i>y</i> | <i>z</i> | iso   | <i>x</i>  | <i>y</i> | <i>z</i> | iso   |
| <i>g</i> -tensor       | DFT         | 1.997     | 2.004    | 2.019    | 2.006 | 2.000     | 2.002    | 2.016    | 2.006 |
|                        | Exp (80 K)  |           |          |          | 2.017 |           |          |          | 2.017 |
|                        | Exp (290 K) |           |          |          | 2.015 |           |          |          | 2.015 |
| <i>A</i> (P1)<br>/MHz  | DFT         | 263.1     | 274.7    | 426.9    | 321.6 | 263.2     | 275.1    | 421.3    | 319.9 |
|                        | Exp (80 K)  | 229.9     | 255.9    | 352.0    | 279.3 | 229.9     | 255.9    | 352.0    | 279.3 |
|                        | Exp (290 K) |           |          |          | 298.7 |           |          |          | 298.7 |
| <i>A</i> (P2)<br>/MHz  | DFT         | -126.9    | -145.8   | 594.7    | 107.4 | -129.0    | -147.8   | 598.8    | 107.3 |
|                        | Exp (80 K)  | -55.3     | -114.4   | 595.0    | 141.8 | -55.3     | -114.4   | 595.0    | 141.8 |
|                        | Exp (290 K) |           |          |          | 192.7 |           |          |          | 192.7 |
| <i>A</i> (Ga1)<br>/MHz | DFT         | 83.2      | 84.2     | 97.4     | 88.3  | 84.1      | 84.8     | 97.5     | 88.8  |
|                        | Exp (80 K)  | 72.2      | 72.6     | 104.3    | 83.1  | 72.2      | 72.6     | 104.3    | 83.1  |
|                        | Exp (290 K) |           |          |          | 92.6  |           |          |          | 92.6  |
| <i>A</i> (Ga2)<br>/MHz | DFT         | -26.8     | -43.0    | -46.1    | -38.6 | -29.7     | -45.7    | -48.9    | -41.4 |
|                        | Exp (80 K)  | -21.2     | -95.3    | -98.1    | -71.5 | -21.2     | -95.3    | -98.1    | -71.5 |
|                        | Exp (290 K) |           |          |          | -59.7 |           |          |          | -59.7 |

**Table S11.** P1 and P2 Mulliken Spin populations (p-orbitals) of the SOMO of compound **4a**.

|    |                |                 |          |
|----|----------------|-----------------|----------|
| P1 | p <sub>z</sub> | 0.123207        | 0.085762 |
|    | p <sub>x</sub> | -0.008936       |          |
|    | p <sub>y</sub> | -0.028509       |          |
| P2 | p <sub>z</sub> | <b>0.327342</b> | 0.767553 |
|    | p <sub>x</sub> | 0.029450        |          |
|    | p <sub>y</sub> | <b>0.410761</b> |          |

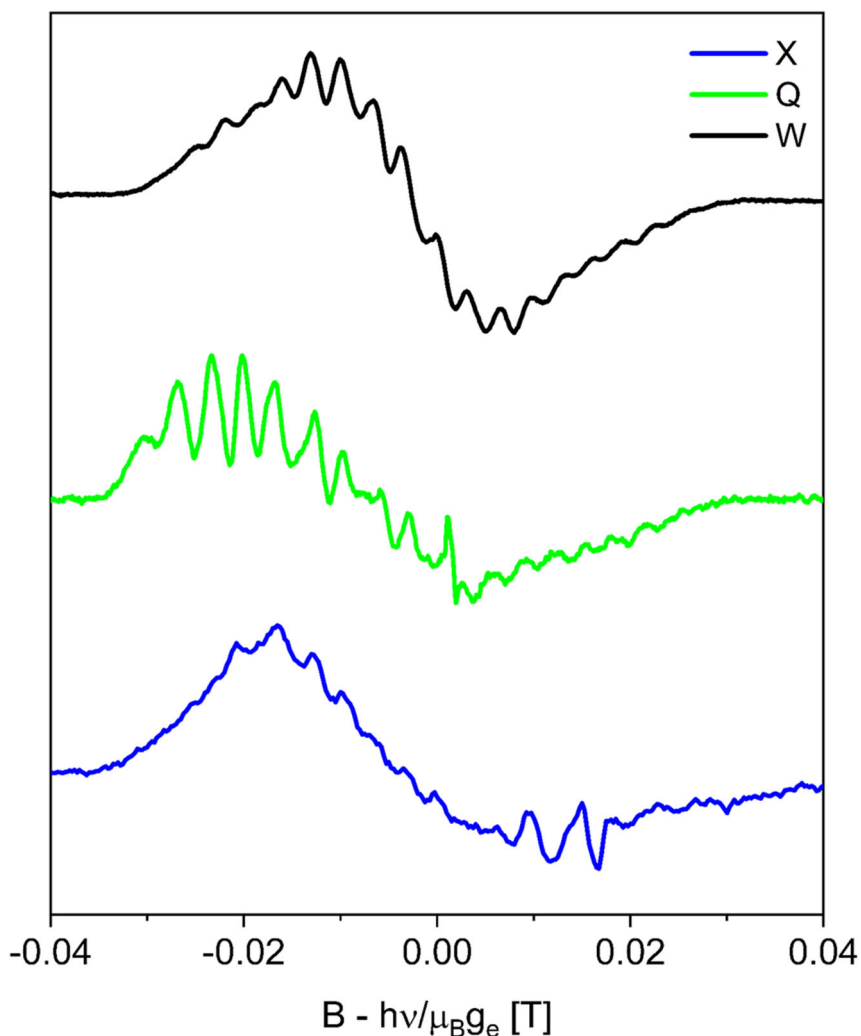

**Figure S53.** X-band CW (~9.64 GHz, black) EPR, Pseudo modulated Q-band (~34 GHz, green) and Pseudo modulated W-band (~94 GHz, blue) Hahn-Echo detected field sweep spectra of **4a** (1 mM 1:9 mixture of fluorobenzene and toluene) at 80 K, 40 K and 32 K, respectively.

**Coordinates of all the optimized geometries:**

| <b>2a</b> |              |              |             |
|-----------|--------------|--------------|-------------|
| Cl        | -3.635127000 | 7.823076000  | 4.184875000 |
| Ga        | -2.276410000 | 8.750283000  | 5.690977000 |
| N         | -3.349031000 | 10.198185000 | 6.495120000 |
| C         | -3.427384000 | 11.369828000 | 5.881452000 |
| C         | -2.607843000 | 11.747786000 | 4.803085000 |
| H         | -2.825186000 | 12.716003000 | 4.379407000 |
| C         | -1.462074000 | 11.118657000 | 4.304114000 |
| C         | -4.442660000 | 12.381861000 | 6.344145000 |
| H         | -4.613163000 | 12.316870000 | 7.416298000 |
| H         | -5.395635000 | 12.183137000 | 5.850001000 |
| H         | -4.130576000 | 13.391108000 | 6.085278000 |
| H         | -0.842238000 | 11.445955000 | 2.291314000 |
| C         | -4.080600000 | 9.902177000  | 7.698249000 |
| C         | -5.400554000 | 9.429132000  | 7.636893000 |
| C         | -6.025734000 | 9.061722000  | 8.829307000 |

|   |              |              |              |
|---|--------------|--------------|--------------|
| H | -7.037680000 | 8.680162000  | 8.798200000  |
| C | -5.369326000 | 9.143641000  | 10.042184000 |
| H | -5.864151000 | 8.828474000  | 10.951542000 |
| C | -4.061560000 | 9.603803000  | 10.086271000 |
| H | -3.548608000 | 9.642474000  | 11.035497000 |
| C | -3.391897000 | 9.985046000  | 8.927355000  |
| C | -6.164419000 | 9.259615000  | 6.336636000  |
| H | -5.517454000 | 9.563896000  | 5.515342000  |
| C | -7.427871000 | 10.131374000 | 6.304595000  |
| H | -8.148834000 | 9.806354000  | 7.057673000  |
| H | -7.912230000 | 10.059305000 | 5.328380000  |
| H | -7.204037000 | 11.181041000 | 6.498750000  |
| C | -6.528472000 | 7.787406000  | 6.102797000  |
| H | -5.641132000 | 7.159121000  | 6.124542000  |
| H | -7.002959000 | 7.667088000  | 5.127075000  |
| H | -7.222172000 | 7.428406000  | 6.866105000  |
| H | -2.349915000 | 12.449117000 | 9.732585000  |
| H | -2.220485000 | 12.369414000 | 7.972647000  |
| H | -1.572922000 | 8.773958000  | 2.587995000  |
| H | -1.235615000 | 8.622673000  | 0.168616000  |
| H | -1.777118000 | 6.554455000  | 1.587786000  |
| P | -2.984380000 | 6.607697000  | 7.999526000  |
| N | -3.212266000 | 3.921453000  | 10.390811000 |
| C | -3.609104000 | 1.897261000  | 11.706760000 |
| H | -3.302734000 | 0.854376000  | 11.671689000 |
| H | -4.663649000 | 1.974925000  | 11.451556000 |
| C | -1.673077000 | 3.596966000  | 6.228583000  |
| H | -2.336587000 | 3.916191000  | 7.035066000  |
| C | -2.301825000 | 4.080546000  | 4.922285000  |
| H | -1.746160000 | 3.731027000  | 4.049822000  |
| H | -3.315518000 | 3.689988000  | 4.835361000  |
| H | -2.365132000 | 5.167001000  | 4.880896000  |
| C | -1.630707000 | 2.062141000  | 6.259536000  |
| H | -2.619207000 | 1.654424000  | 6.037309000  |
| C | -4.589419000 | 4.304167000  | 10.531349000 |
| C | -5.027622000 | 5.007713000  | 11.664449000 |
| C | -6.362732000 | 5.408753000  | 11.716702000 |
| H | -6.717227000 | 5.950364000  | 12.584281000 |
| C | -7.238692000 | 5.132378000  | 10.681622000 |
| H | -8.271062000 | 5.453431000  | 10.741553000 |
| C | -6.787378000 | 4.448716000  | 9.563019000  |
| H | -7.473563000 | 4.245396000  | 8.752479000  |
| C | -5.464203000 | 4.028689000  | 9.461554000  |
| C | -4.107306000 | 5.359890000  | 12.817540000 |
| C | -4.585731000 | 4.741631000  | 14.137969000 |
| H | -4.709829000 | 3.660823000  | 14.054616000 |
| H | -5.545721000 | 5.159925000  | 14.447754000 |
| C | -3.960785000 | 6.880760000  | 12.954259000 |
| H | -4.910400000 | 7.342976000  | 13.234659000 |
| H | -3.625789000 | 7.325043000  | 12.018937000 |
| C | -5.000906000 | 3.264962000  | 8.233492000  |
| H | -3.915584000 | 3.343676000  | 8.191373000  |
| C | -5.337413000 | 1.771293000  | 8.349455000  |
| H | -4.970835000 | 1.230174000  | 7.474499000  |
| H | -4.884378000 | 1.323644000  | 9.233837000  |

|    |              |              |              |
|----|--------------|--------------|--------------|
| H  | -6.417956000 | 1.623419000  | 8.413091000  |
| C  | -5.552695000 | 3.843029000  | 6.928750000  |
| H  | -5.124691000 | 3.312499000  | 6.077362000  |
| H  | -6.636765000 | 3.737008000  | 6.861251000  |
| H  | -5.305985000 | 4.899655000  | 6.829343000  |
| P  | -1.240761000 | 7.343268000  | 7.238280000  |
| N  | -1.058478000 | 9.907925000  | 4.680852000  |
| C  | -0.652589000 | 11.869898000 | 3.279960000  |
| H  | -0.923807000 | 12.922510000 | 3.261791000  |
| H  | 0.415276000  | 11.774676000 | 3.465768000  |
| C  | -1.946579000 | 10.446045000 | 8.991456000  |
| H  | -1.445673000 | 10.032207000 | 8.112890000  |
| C  | -1.195389000 | 9.925927000  | 10.216920000 |
| H  | -1.556521000 | 10.388460000 | 11.138023000 |
| H  | -0.136810000 | 10.170182000 | 10.128836000 |
| H  | -1.281492000 | 8.845353000  | 10.320759000 |
| C  | -1.819881000 | 11.973835000 | 8.904073000  |
| H  | -0.769551000 | 12.267206000 | 8.962988000  |
| C  | 0.250669000  | 9.415554000  | 4.353261000  |
| C  | 0.458240000  | 8.644106000  | 3.197979000  |
| C  | 1.745080000  | 8.171011000  | 2.941451000  |
| H  | 1.921195000  | 7.577896000  | 2.053346000  |
| C  | 2.797842000  | 8.444984000  | 3.797716000  |
| H  | 3.790559000  | 8.072593000  | 3.577445000  |
| C  | 2.572553000  | 9.189676000  | 4.944495000  |
| H  | 3.395598000  | 9.391367000  | 5.616960000  |
| C  | 1.304785000  | 9.678659000  | 5.249323000  |
| C  | -0.660123000 | 8.299725000  | 2.233306000  |
| C  | -0.379889000 | 8.819680000  | 0.817505000  |
| H  | -0.190358000 | 9.894256000  | 0.813343000  |
| H  | 0.491234000  | 8.330445000  | 0.376410000  |
| C  | -0.913934000 | 6.787059000  | 2.213283000  |
| H  | -0.049031000 | 6.248778000  | 1.817828000  |
| H  | -1.121915000 | 6.413820000  | 3.214136000  |
| C  | 1.100195000  | 10.493445000 | 6.514696000  |
| H  | 0.028030000  | 10.571523000 | 6.687626000  |
| C  | 1.636572000  | 11.922574000 | 6.354666000  |
| H  | 1.459194000  | 12.499112000 | 7.265055000  |
| H  | 1.152994000  | 12.444195000 | 5.528307000  |
| H  | 2.712124000  | 11.914357000 | 6.163495000  |
| C  | 1.716146000  | 9.814801000  | 7.740788000  |
| H  | 1.494275000  | 10.390227000 | 8.640360000  |
| H  | 2.802401000  | 9.744475000  | 7.661830000  |
| H  | 1.319643000  | 8.809105000  | 7.872792000  |
| Cl | -0.955869000 | 6.213223000  | 11.299754000 |
| Ga | -1.983682000 | 5.222302000  | 9.586617000  |
| N  | -0.682279000 | 3.903352000  | 8.908328000  |
| C  | -0.575700000 | 2.726304000  | 9.509892000  |
| C  | -1.492998000 | 2.240973000  | 10.456985000 |
| H  | -1.241744000 | 1.285755000  | 10.892031000 |
| C  | -2.752116000 | 2.745594000  | 10.804353000 |
| C  | 0.588775000  | 1.827729000  | 9.182262000  |
| H  | 0.946817000  | 1.986104000  | 8.168092000  |
| H  | 1.414107000  | 2.050861000  | 9.861709000  |
| H  | 0.318652000  | 0.782143000  | 9.314073000  |

|   |              |             |              |
|---|--------------|-------------|--------------|
| H | -3.499820000 | 2.252287000 | 12.734349000 |
| C | 0.180066000  | 4.310481000 | 7.831768000  |
| C | 1.420159000  | 4.910778000 | 8.098391000  |
| C | 2.161249000  | 5.400200000 | 7.021714000  |
| H | 3.112327000  | 5.879849000 | 7.212292000  |
| C | 1.692175000  | 5.314878000 | 5.724903000  |
| H | 2.265886000  | 5.732676000 | 4.908591000  |
| C | 0.463891000  | 4.720166000 | 5.476801000  |
| H | 0.097997000  | 4.675867000 | 4.462147000  |
| C | -0.314302000 | 4.211220000 | 6.513099000  |
| C | 1.969095000  | 5.091648000 | 9.501607000  |
| H | 1.240839000  | 4.696423000 | 10.207652000 |
| C | 3.289155000  | 4.332874000 | 9.697014000  |
| H | 4.077566000  | 4.746028000 | 9.064262000  |
| H | 3.620433000  | 4.411972000 | 10.734682000 |
| H | 3.192293000  | 3.275231000 | 9.449367000  |
| C | 2.156682000  | 6.578308000 | 9.831080000  |
| H | 1.232885000  | 7.131420000 | 9.676610000  |
| H | 2.448476000  | 6.699032000 | 10.875979000 |
| H | 2.934386000  | 7.024442000 | 9.207657000  |
| H | -0.933084000 | 1.682666000 | 5.509526000  |
| H | -1.326959000 | 1.678141000 | 7.231487000  |
| H | -3.118442000 | 4.961367000 | 12.598446000 |
| H | -3.863821000 | 4.942039000 | 14.932374000 |
| H | -3.223963000 | 7.123136000 | 13.721932000 |

## 2b

|    |              |              |              |
|----|--------------|--------------|--------------|
| Br | -3.565077000 | 7.746069000  | 3.945188000  |
| Ga | -2.242722000 | 8.745307000  | 5.664129000  |
| N  | -3.414213000 | 10.138064000 | 6.435105000  |
| C  | -3.508740000 | 11.306614000 | 5.815228000  |
| C  | -2.652423000 | 11.722164000 | 4.779637000  |
| H  | -2.896209000 | 12.677223000 | 4.340034000  |
| C  | -1.443745000 | 11.158584000 | 4.356924000  |
| C  | -4.584688000 | 12.281432000 | 6.218993000  |
| H  | -4.886715000 | 12.145226000 | 7.254061000  |
| H  | -5.464578000 | 12.118262000 | 5.593082000  |
| H  | -4.252211000 | 13.306382000 | 6.068440000  |
| H  | -0.776374000 | 11.554244000 | 2.375668000  |
| C  | -4.199257000 | 9.813518000  | 7.598141000  |
| C  | -5.500890000 | 9.303363000  | 7.466664000  |
| C  | -6.181615000 | 8.918523000  | 8.622702000  |
| H  | -7.178946000 | 8.508585000  | 8.534949000  |
| C  | -5.599247000 | 9.022738000  | 9.870313000  |
| H  | -6.133358000 | 8.692881000  | 10.751669000 |
| C  | -4.312690000 | 9.526308000  | 9.985124000  |
| H  | -3.861127000 | 9.591522000  | 10.962756000 |
| C  | -3.587302000 | 9.924077000  | 8.865654000  |
| C  | -6.191616000 | 9.109835000  | 6.129928000  |
| H  | -5.505948000 | 9.412380000  | 5.340537000  |
| C  | -7.462545000 | 9.963784000  | 6.017275000  |
| H  | -8.219009000 | 9.638854000  | 6.734733000  |
| H  | -7.891953000 | 9.872137000  | 5.017251000  |
| H  | -7.263083000 | 11.018746000 | 6.207637000  |

|   |              |              |              |
|---|--------------|--------------|--------------|
| C | -6.524711000 | 7.629700000  | 5.899600000  |
| H | -5.639285000 | 7.009020000  | 6.018427000  |
| H | -6.907950000 | 7.480152000  | 4.888733000  |
| H | -7.282093000 | 7.283735000  | 6.606262000  |
| H | -2.700651000 | 12.447802000 | 9.656333000  |
| H | -2.419697000 | 12.320600000 | 7.917306000  |
| H | -1.244352000 | 8.837321000  | 2.615490000  |
| H | -0.624687000 | 8.746887000  | 0.251652000  |
| H | -1.252206000 | 6.628302000  | 1.570064000  |
| P | -2.916229000 | 6.624532000  | 8.016836000  |
| N | -3.101399000 | 3.989303000  | 10.448158000 |
| C | -3.492123000 | 2.010633000  | 11.832019000 |
| H | -3.208644000 | 0.960876000  | 11.828129000 |
| H | -4.555376000 | 2.100108000  | 11.620330000 |
| C | -1.936816000 | 3.522376000  | 6.192373000  |
| H | -2.520337000 | 3.951439000  | 7.010684000  |
| C | -2.602235000 | 3.969795000  | 4.890758000  |
| H | -2.137212000 | 3.504288000  | 4.019184000  |
| H | -3.650016000 | 3.672243000  | 4.890994000  |
| H | -2.566899000 | 5.050922000  | 4.764255000  |
| C | -2.016861000 | 1.994226000  | 6.322292000  |
| H | -3.047167000 | 1.660007000  | 6.184275000  |
| C | -4.459640000 | 4.414514000  | 10.644775000 |
| C | -4.815546000 | 5.190315000  | 11.759943000 |
| C | -6.133552000 | 5.634658000  | 11.863804000 |
| H | -6.422323000 | 6.233200000  | 12.718181000 |
| C | -7.076067000 | 5.327660000  | 10.898176000 |
| H | -8.093756000 | 5.684027000  | 10.996969000 |
| C | -6.709936000 | 4.562224000  | 9.802617000  |
| H | -7.448860000 | 4.324848000  | 9.049227000  |
| C | -5.406195000 | 4.097583000  | 9.650700000  |
| C | -3.827464000 | 5.562600000  | 12.848137000 |
| C | -4.254486000 | 5.010384000  | 14.214636000 |
| H | -4.417668000 | 3.932126000  | 14.178388000 |
| H | -5.182318000 | 5.472659000  | 14.558063000 |
| C | -3.630727000 | 7.081802000  | 12.915544000 |
| H | -4.554494000 | 7.585053000  | 13.211169000 |
| H | -3.320504000 | 7.477063000  | 11.950287000 |
| C | -5.052362000 | 3.240633000  | 8.448139000  |
| H | -3.966836000 | 3.191387000  | 8.384228000  |
| C | -5.559085000 | 1.802609000  | 8.626810000  |
| H | -5.274525000 | 1.188739000  | 7.769527000  |
| H | -5.145550000 | 1.339638000  | 9.523114000  |
| H | -6.648090000 | 1.782548000  | 8.710768000  |
| C | -5.566348000 | 3.837225000  | 7.135765000  |
| H | -5.248797000 | 3.219520000  | 6.295492000  |
| H | -6.656198000 | 3.882939000  | 7.109884000  |
| H | -5.182018000 | 4.845720000  | 6.984088000  |
| P | -1.189700000 | 7.336857000  | 7.197228000  |
| N | -1.004710000 | 9.971407000  | 4.765102000  |
| C | -0.613709000 | 11.950035000 | 3.381207000  |
| H | -0.896037000 | 13.000100000 | 3.386089000  |
| H | 0.449657000  | 11.859243000 | 3.591727000  |
| C | -2.167127000 | 10.439521000 | 9.021335000  |
| H | -1.584271000 | 10.010155000 | 8.202717000  |

|    |              |              |              |
|----|--------------|--------------|--------------|
| C  | -1.501191000 | 9.991844000  | 10.322609000 |
| H  | -1.965238000 | 10.457940000 | 11.194391000 |
| H  | -0.453162000 | 10.288514000 | 10.321590000 |
| H  | -1.537385000 | 8.910782000  | 10.449409000 |
| C  | -2.086465000 | 11.967616000 | 8.891247000  |
| H  | -1.055900000 | 12.301374000 | 9.028458000  |
| C  | 0.353242000  | 9.545602000  | 4.567723000  |
| C  | 0.708232000  | 8.769795000  | 3.452266000  |
| C  | 2.026018000  | 8.324980000  | 3.347618000  |
| H  | 2.314109000  | 7.726491000  | 2.492975000  |
| C  | 2.969188000  | 8.631516000  | 4.312755000  |
| H  | 3.986694000  | 8.274798000  | 4.213338000  |
| C  | 2.603960000  | 9.396983000  | 5.408593000  |
| H  | 3.343401000  | 9.634048000  | 6.161572000  |
| C  | 1.300479000  | 9.862104000  | 5.561278000  |
| C  | -0.280562000 | 8.398151000  | 2.364502000  |
| C  | 0.145980000  | 8.950483000  | 0.997902000  |
| H  | 0.309703000  | 10.028652000 | 1.034309000  |
| H  | 1.073398000  | 8.487843000  | 0.653843000  |
| C  | -0.477986000 | 6.879051000  | 2.296884000  |
| H  | 0.445484000  | 6.375407000  | 2.001004000  |
| H  | -0.788212000 | 6.483820000  | 3.262147000  |
| C  | 0.947648000  | 10.719199000 | 6.764022000  |
| H  | -0.137824000 | 10.768781000 | 6.828583000  |
| C  | 1.454713000  | 12.157055000 | 6.584992000  |
| H  | 1.170896000  | 12.771040000 | 7.442438000  |
| H  | 1.040769000  | 12.620139000 | 5.688934000  |
| H  | 2.543671000  | 12.176752000 | 6.500347000  |
| C  | 1.462242000  | 10.122487000 | 8.076106000  |
| H  | 1.145240000  | 10.740221000 | 8.916562000  |
| H  | 2.552099000  | 10.076606000 | 8.101391000  |
| H  | 1.077826000  | 9.114053000  | 8.227949000  |
| Br | -0.542190000 | 6.215119000  | 11.269828000 |
| Ga | -1.863405000 | 5.216004000  | 9.549985000  |
| N  | -0.691112000 | 3.823762000  | 8.779308000  |
| C  | -0.596309000 | 2.655253000  | 9.399204000  |
| C  | -1.452879000 | 2.239314000  | 10.434439000 |
| H  | -1.208818000 | 1.284393000  | 10.874187000 |
| C  | -2.661995000 | 2.802353000  | 10.856611000 |
| C  | 0.480254000  | 1.680941000  | 8.995872000  |
| H  | 0.782660000  | 1.817336000  | 7.960939000  |
| H  | 1.359807000  | 1.844478000  | 9.622162000  |
| H  | 0.148175000  | 0.655832000  | 9.146229000  |
| H  | -3.330974000 | 2.407312000  | 12.837446000 |
| C  | 0.094366000  | 4.148861000  | 7.616735000  |
| C  | 1.395720000  | 4.659524000  | 7.748993000  |
| C  | 2.076836000  | 5.045031000  | 6.593408000  |
| H  | 3.073953000  | 5.455351000  | 6.681784000  |
| C  | 1.495079000  | 4.941048000  | 5.345495000  |
| H  | 2.029442000  | 5.271473000  | 4.464505000  |
| C  | 0.208784000  | 4.436983000  | 5.229910000  |
| H  | -0.242288000 | 4.371964000  | 4.252044000  |
| C  | -0.516943000 | 4.038438000  | 6.348890000  |
| C  | 2.085682000  | 4.853059000  | 9.086120000  |
| H  | 1.399739000  | 4.550105000  | 9.875116000  |



|   |              |             |              |
|---|--------------|-------------|--------------|
| C | 3.356901000  | 3.999608000 | 9.199272000  |
| H | 4.113590000  | 4.324926000 | 8.482228000  |
| H | 3.785784000  | 4.091307000 | 10.199517000 |
| H | 3.157966000  | 2.944586000 | 9.008688000  |
| C | 2.418083000  | 6.333286000 | 9.316885000  |
| H | 1.532504000  | 6.953667000 | 9.197658000  |
| H | 2.800675000  | 6.482807000 | 10.328002000 |
| H | 3.175752000  | 6.679644000 | 8.610725000  |
| H | -1.401887000 | 1.514380000 | 5.557625000  |
| H | -1.684211000 | 1.641312000 | 7.296448000  |
| H | -2.863355000 | 5.123791000 | 12.597736000 |
| H | -3.484334000 | 5.214527000 | 14.961269000 |
| H | -2.856777000 | 7.333007000 | 13.642494000 |

**3a**

|   |              |              |              |
|---|--------------|--------------|--------------|
| N | 4.076922000  | 25.334970000 | 13.693610000 |
| N | 3.215005000  | 25.361122000 | 11.717966000 |
| C | 2.044273000  | 25.341575000 | 17.612182000 |
| H | 1.781278000  | 24.309503000 | 17.804667000 |
| C | 3.088980000  | 25.920267000 | 18.311433000 |
| C | 0.215389000  | 25.360721000 | 15.891608000 |
| C | -0.808551000 | 24.696149000 | 16.820864000 |
| H | -1.647980000 | 24.313469000 | 16.237077000 |
| H | -1.200221000 | 25.391570000 | 17.564248000 |
| H | -0.371826000 | 23.852822000 | 17.359787000 |
| C | 0.796551000  | 24.323607000 | 14.922190000 |
| H | 1.484649000  | 24.786294000 | 14.219959000 |
| H | -0.002136000 | 23.859792000 | 14.340754000 |
| H | 1.325617000  | 23.537206000 | 15.466282000 |
| C | 8.121702000  | 25.002116000 | 12.928904000 |
| C | 8.017763000  | 23.935511000 | 13.823319000 |
| H | 7.903633000  | 22.931885000 | 13.433694000 |
| C | 8.070978000  | 24.133465000 | 15.191312000 |
| H | 8.000749000  | 23.290991000 | 15.868504000 |
| C | 8.056462000  | 24.708417000 | 11.439926000 |
| H | 8.227339000  | 25.636978000 | 10.899079000 |
| C | 9.114597000  | 23.685017000 | 11.002771000 |
| H | 9.130552000  | 23.605140000 | 9.913893000  |
| H | 8.894767000  | 22.692363000 | 11.401603000 |
| H | 10.114848000 | 23.957355000 | 11.339571000 |
| C | 6.660680000  | 24.214859000 | 11.044016000 |
| H | 6.608777000  | 24.055253000 | 9.964963000  |
| H | 5.906351000  | 24.950691000 | 11.305493000 |
| H | 6.423734000  | 23.271755000 | 11.542043000 |
| C | 3.942955000  | 24.011991000 | 13.297913000 |
| C | 3.391445000  | 24.027609000 | 12.054525000 |
| H | 5.423699000  | 25.101082000 | 15.261376000 |
| H | 3.791840000  | 25.625187000 | 15.745575000 |
| H | 2.963068000  | 25.088792000 | 9.672840000  |
| C | 4.356846000  | 22.882553000 | 14.165554000 |
| H | 4.110495000  | 21.934859000 | 13.690479000 |
| H | 3.850444000  | 22.919742000 | 15.132681000 |
| H | 5.432224000  | 22.901243000 | 14.353051000 |
| C | 3.039270000  | 22.913631000 | 11.139316000 |

|    |              |              |              |
|----|--------------|--------------|--------------|
| H  | 3.681262000  | 22.899048000 | 10.254505000 |
| H  | 2.003328000  | 22.986115000 | 10.801615000 |
| H  | 3.159096000  | 21.960143000 | 11.650314000 |
| H  | 3.635316000  | 25.344883000 | 19.048239000 |
| Cl | 0.071932000  | 26.867381000 | 12.616495000 |
| Cl | 6.177531000  | 27.511688000 | 10.194914000 |
| Ga | 1.519631000  | 28.327271000 | 13.581293000 |
| Ga | 6.763719000  | 28.513487000 | 12.149567000 |
| P  | 3.592665000  | 28.012462000 | 12.577660000 |
| P  | 5.181772000  | 28.884444000 | 13.749317000 |
| N  | 0.675454000  | 30.075219000 | 13.259737000 |
| N  | 0.956760000  | 28.195867000 | 15.477955000 |
| N  | 8.412434000  | 27.428992000 | 12.582567000 |
| N  | 7.818969000  | 30.097071000 | 11.570105000 |
| C  | -0.469663000 | 30.339212000 | 13.885216000 |
| C  | -0.912413000 | 29.650084000 | 15.019372000 |
| H  | -1.871066000 | 29.957719000 | 15.405980000 |
| C  | -0.202879000 | 28.750464000 | 15.823579000 |
| C  | -1.355040000 | 31.444345000 | 13.368805000 |
| H  | -1.787228000 | 31.142677000 | 12.412692000 |
| H  | -0.794269000 | 32.358538000 | 13.185845000 |
| H  | -2.161813000 | 31.651587000 | 14.067192000 |
| C  | -0.815038000 | 28.427581000 | 17.163183000 |
| H  | -1.332542000 | 27.468716000 | 17.111480000 |
| H  | -1.538288000 | 29.189187000 | 17.444029000 |
| H  | -0.059414000 | 28.346872000 | 17.941383000 |
| C  | 1.183278000  | 31.032770000 | 12.311782000 |
| C  | 0.823301000  | 30.955975000 | 10.957369000 |
| C  | 1.258972000  | 31.965992000 | 10.102069000 |
| H  | 0.988582000  | 31.926457000 | 9.055074000  |
| C  | 2.038967000  | 33.012166000 | 10.565209000 |
| H  | 2.366108000  | 33.788187000 | 9.884484000  |
| C  | 2.421742000  | 33.048960000 | 11.895376000 |
| H  | 3.057193000  | 33.849861000 | 12.245316000 |
| C  | 2.006536000  | 32.066721000 | 12.791163000 |
| C  | 0.013418000  | 29.801796000 | 10.401456000 |
| H  | -0.365863000 | 29.216007000 | 11.236739000 |
| C  | -1.190576000 | 30.258936000 | 9.570874000  |
| H  | -0.879844000 | 30.775525000 | 8.660571000  |
| H  | -1.835196000 | 30.937639000 | 10.132683000 |
| C  | 0.923338000  | 28.880868000 | 9.578307000  |
| H  | 1.285967000  | 29.392928000 | 8.683904000  |
| H  | 0.379688000  | 27.986294000 | 9.267841000  |
| H  | 1.790921000  | 28.576058000 | 10.161620000 |
| C  | 2.403405000  | 32.167371000 | 14.253106000 |
| H  | 2.215154000  | 31.197832000 | 14.710334000 |
| C  | 1.538031000  | 33.199512000 | 14.990830000 |
| H  | 0.481483000  | 32.931409000 | 14.975396000 |
| H  | 1.642491000  | 34.186089000 | 14.533313000 |
| H  | 1.845823000  | 33.277696000 | 16.035279000 |
| C  | 3.889728000  | 32.479730000 | 14.430301000 |
| H  | 4.146145000  | 33.467319000 | 14.046374000 |
| H  | 4.505647000  | 31.739958000 | 13.920864000 |
| H  | 4.147457000  | 32.465375000 | 15.491072000 |
| C  | 1.682347000  | 27.401272000 | 16.427109000 |

|   |              |              |              |
|---|--------------|--------------|--------------|
| C | 1.325381000  | 26.061156000 | 16.655818000 |
| C | 3.446088000  | 27.235889000 | 18.053034000 |
| C | 2.757662000  | 28.000309000 | 17.114162000 |
| H | -0.304102000 | 26.098941000 | 15.284081000 |
| C | 3.140785000  | 29.450045000 | 16.863930000 |
| H | 3.061677000  | 29.620352000 | 15.788507000 |
| C | 4.581670000  | 29.776859000 | 17.248421000 |
| H | 4.736424000  | 29.735856000 | 18.329367000 |
| H | 4.821511000  | 30.787756000 | 16.920281000 |
| H | 5.279311000  | 29.103592000 | 16.757817000 |
| C | 9.570766000  | 27.686727000 | 11.988524000 |
| C | 9.818410000  | 28.818109000 | 11.199165000 |
| H | 10.792947000 | 28.855428000 | 10.737499000 |
| C | 9.044662000  | 29.975236000 | 11.075371000 |
| C | 10.737762000 | 26.743373000 | 12.158176000 |
| H | 11.676894000 | 27.283013000 | 12.056526000 |
| H | 10.706325000 | 25.977778000 | 11.381871000 |
| H | 10.717227000 | 26.238404000 | 13.120691000 |
| C | 9.674590000  | 31.153861000 | 10.378206000 |
| H | 9.043154000  | 31.489020000 | 9.554753000  |
| H | 10.657534000 | 30.895309000 | 9.991889000  |
| H | 9.774288000  | 32.000097000 | 11.058316000 |
| C | 8.283977000  | 26.298019000 | 13.451150000 |
| C | 8.211308000  | 25.419900000 | 15.692661000 |
| H | 8.239237000  | 25.566722000 | 16.762638000 |
| C | 8.310929000  | 26.519126000 | 14.844069000 |
| C | 8.473636000  | 27.919881000 | 15.410966000 |
| H | 7.883698000  | 28.586103000 | 14.780616000 |
| C | 9.933108000  | 28.394188000 | 15.359715000 |
| H | 10.314005000 | 28.435973000 | 14.341477000 |
| H | 10.575627000 | 27.726500000 | 15.938958000 |
| H | 10.017794000 | 29.396555000 | 15.784654000 |
| C | 7.930490000  | 28.055606000 | 16.833285000 |
| H | 6.919007000  | 27.658125000 | 16.911436000 |
| H | 7.901114000  | 29.106716000 | 17.119850000 |
| H | 8.561259000  | 27.537236000 | 17.559406000 |
| C | 7.225449000  | 31.399149000 | 11.657035000 |
| C | 6.388696000  | 31.867225000 | 10.632383000 |
| C | 5.853916000  | 33.148802000 | 10.751075000 |
| H | 5.202643000  | 33.522110000 | 9.972054000  |
| C | 6.138191000  | 33.948379000 | 11.845711000 |
| H | 5.719544000  | 34.944964000 | 11.915286000 |
| C | 6.946385000  | 33.461451000 | 12.860582000 |
| H | 7.146046000  | 34.079738000 | 13.726651000 |
| C | 7.492631000  | 32.182447000 | 12.793425000 |
| C | 6.042261000  | 31.013663000 | 9.428143000  |
| H | 6.652374000  | 30.113612000 | 9.463854000  |
| C | 6.341591000  | 31.723304000 | 8.102099000  |
| H | 6.156488000  | 31.046096000 | 7.265657000  |
| H | 7.380865000  | 32.053595000 | 8.046070000  |
| H | 5.706388000  | 32.600821000 | 7.963572000  |
| C | 4.575530000  | 30.570945000 | 9.487927000  |
| H | 4.362919000  | 29.855370000 | 8.691784000  |
| H | 3.909101000  | 31.425411000 | 9.372800000  |
| H | 4.341300000  | 30.092592000 | 10.438252000 |

|   |              |              |              |
|---|--------------|--------------|--------------|
| C | 8.339060000  | 31.668788000 | 13.945883000 |
| H | 8.662164000  | 30.659159000 | 13.698139000 |
| C | 9.601396000  | 32.512938000 | 14.159533000 |
| H | 9.350742000  | 33.536400000 | 14.446840000 |
| H | 10.210337000 | 32.560501000 | 13.255236000 |
| H | 10.214517000 | 32.083704000 | 14.955154000 |
| C | 7.511664000  | 31.581637000 | 15.233584000 |
| H | 6.654544000  | 30.923070000 | 15.096428000 |
| H | 7.137690000  | 32.563486000 | 15.530960000 |
| H | 8.119289000  | 31.193284000 | 16.053400000 |
| C | 3.607212000  | 26.167219000 | 12.735541000 |
| C | 4.576328000  | 25.729736000 | 15.001931000 |
| H | 4.909351000  | 26.765339000 | 14.945215000 |
| C | 2.721492000  | 25.828642000 | 10.431122000 |
| H | 3.223341000  | 26.763801000 | 10.196075000 |
| H | 1.646242000  | 25.990169000 | 10.475133000 |
| H | 4.275679000  | 27.673038000 | 18.588932000 |
| C | 2.186103000  | 30.421914000 | 17.573624000 |
| H | 2.160147000  | 30.215906000 | 18.646333000 |
| H | 1.170276000  | 30.367209000 | 17.188752000 |
| H | 2.532650000  | 31.447387000 | 17.437495000 |
| H | -1.787221000 | 29.394836000 | 9.271441000  |

**3b**

|   |              |              |              |
|---|--------------|--------------|--------------|
| N | 4.049841000  | 25.318356000 | 13.640031000 |
| N | 3.211443000  | 25.358014000 | 11.654563000 |
| C | 2.070017000  | 25.337609000 | 17.606602000 |
| H | 1.808748000  | 24.306709000 | 17.807727000 |
| C | 3.122960000  | 25.919410000 | 18.290031000 |
| C | 0.224063000  | 25.341782000 | 15.908825000 |
| C | -0.795311000 | 24.694887000 | 16.855561000 |
| H | -1.640903000 | 24.307801000 | 16.283594000 |
| H | -1.177944000 | 25.402074000 | 17.592472000 |
| H | -0.357477000 | 23.857249000 | 17.402564000 |
| C | 0.796815000  | 24.286147000 | 14.954740000 |
| H | 1.487281000  | 24.732680000 | 14.243924000 |
| H | -0.005402000 | 23.818160000 | 14.381716000 |
| H | 1.321587000  | 23.505358000 | 15.511145000 |
| C | 8.144198000  | 24.988971000 | 12.994822000 |
| C | 8.036085000  | 23.944618000 | 13.915081000 |
| H | 7.934649000  | 22.930722000 | 13.549069000 |
| C | 8.069400000  | 24.176006000 | 15.277824000 |
| H | 7.993237000  | 23.350423000 | 15.974981000 |
| C | 8.104329000  | 24.647567000 | 11.515837000 |
| H | 8.250804000  | 25.563597000 | 10.947198000 |
| C | 9.198451000  | 23.644190000 | 11.122177000 |
| H | 9.229034000  | 23.531281000 | 10.036394000 |
| H | 9.002687000  | 22.658272000 | 11.549525000 |
| H | 10.186270000 | 23.955641000 | 11.461013000 |
| C | 6.730714000  | 24.094460000 | 11.121500000 |
| H | 6.692662000  | 23.911043000 | 10.045737000 |
| H | 5.947347000  | 24.806069000 | 11.362518000 |
| H | 6.522829000  | 23.153320000 | 11.636567000 |
| C | 3.922705000  | 23.998115000 | 13.232987000 |

|    |              |              |              |
|----|--------------|--------------|--------------|
| C  | 3.386555000  | 24.022748000 | 11.983038000 |
| H  | 5.400489000  | 25.080024000 | 15.204750000 |
| H  | 3.762831000  | 25.578609000 | 15.696473000 |
| H  | 3.115919000  | 25.167921000 | 9.585661000  |
| C  | 4.331771000  | 22.863014000 | 14.095397000 |
| H  | 4.083802000  | 21.918665000 | 13.614332000 |
| H  | 3.823400000  | 22.896337000 | 15.061596000 |
| H  | 5.406994000  | 22.877262000 | 14.285501000 |
| C  | 3.047709000  | 22.918553000 | 11.051380000 |
| H  | 3.708591000  | 22.908613000 | 10.180410000 |
| H  | 2.020055000  | 23.002057000 | 10.691468000 |
| H  | 3.150060000  | 21.959508000 | 11.555914000 |
| H  | 3.678692000  | 25.347952000 | 19.023030000 |
| Br | -0.060549000 | 26.791875000 | 12.509252000 |
| Br | 6.171449000  | 27.396289000 | 10.038402000 |
| Ga | 1.509604000  | 28.327529000 | 13.563956000 |
| Ga | 6.759555000  | 28.491170000 | 12.138410000 |
| P  | 3.575483000  | 28.004171000 | 12.543475000 |
| P  | 5.165262000  | 28.860652000 | 13.725255000 |
| N  | 0.674081000  | 30.085224000 | 13.260601000 |
| N  | 0.959083000  | 28.181630000 | 15.465341000 |
| N  | 8.409557000  | 27.415024000 | 12.592161000 |
| N  | 7.802862000  | 30.082638000 | 11.560287000 |
| C  | -0.467998000 | 30.344562000 | 13.894519000 |
| C  | -0.907835000 | 29.644122000 | 15.022894000 |
| H  | -1.865364000 | 29.949073000 | 15.414519000 |
| C  | -0.197097000 | 28.738902000 | 15.819582000 |
| C  | -1.354179000 | 31.456399000 | 13.394573000 |
| H  | -1.789544000 | 31.166277000 | 12.436268000 |
| H  | -0.793710000 | 32.372726000 | 13.221190000 |
| H  | -2.158702000 | 31.655160000 | 14.098097000 |
| C  | -0.805183000 | 28.412230000 | 17.159989000 |
| H  | -1.336719000 | 27.461421000 | 17.100640000 |
| H  | -1.516380000 | 29.180974000 | 17.452273000 |
| H  | -0.046903000 | 28.313004000 | 17.933404000 |
| C  | 1.178717000  | 31.055774000 | 12.322004000 |
| C  | 0.808707000  | 31.002548000 | 10.968744000 |
| C  | 1.241783000  | 32.024055000 | 10.125909000 |
| H  | 0.962969000  | 32.000919000 | 9.080611000  |
| C  | 2.027823000  | 33.060979000 | 10.598905000 |
| H  | 2.353036000  | 33.846213000 | 9.927680000  |
| C  | 2.416806000  | 33.077559000 | 11.927385000 |
| H  | 3.054053000  | 33.873230000 | 12.286192000 |
| C  | 2.004428000  | 32.083329000 | 12.811253000 |
| C  | -0.012195000 | 29.863767000 | 10.399234000 |
| H  | -0.394182000 | 29.271147000 | 11.228012000 |
| C  | -1.215825000 | 30.340499000 | 9.579484000  |
| H  | -0.905715000 | 30.862087000 | 8.671730000  |
| H  | -1.851028000 | 31.020269000 | 10.150897000 |
| C  | 0.886570000  | 28.945134000 | 9.561458000  |
| H  | 1.248064000  | 29.464603000 | 8.670794000  |
| H  | 0.335686000  | 28.056828000 | 9.246358000  |
| H  | 1.754835000  | 28.628001000 | 10.137176000 |
| C  | 2.406261000  | 32.169018000 | 14.272458000 |
| H  | 2.211302000  | 31.197757000 | 14.722637000 |

|   |              |              |              |
|---|--------------|--------------|--------------|
| C | 1.551373000  | 33.202752000 | 15.020315000 |
| H | 0.492587000  | 32.943043000 | 15.006250000 |
| H | 1.661961000  | 34.191844000 | 14.569594000 |
| H | 1.862904000  | 33.271247000 | 16.064382000 |
| C | 3.895608000  | 32.468599000 | 14.446308000 |
| H | 4.159208000  | 33.454937000 | 14.063967000 |
| H | 4.504160000  | 31.725447000 | 13.932684000 |
| H | 4.156324000  | 32.450036000 | 15.506187000 |
| C | 1.693746000  | 27.390357000 | 16.412219000 |
| C | 1.340639000  | 26.051291000 | 16.653708000 |
| C | 3.474402000  | 27.234332000 | 18.021915000 |
| C | 2.773390000  | 27.994216000 | 17.088781000 |
| H | -0.298013000 | 26.071610000 | 15.293305000 |
| C | 3.146179000  | 29.446672000 | 16.840363000 |
| H | 3.054311000  | 29.622228000 | 15.767019000 |
| C | 4.589010000  | 29.779275000 | 17.211412000 |
| H | 4.756269000  | 29.732198000 | 18.290271000 |
| H | 4.820109000  | 30.793447000 | 16.887635000 |
| H | 5.284075000  | 29.112605000 | 16.708418000 |
| C | 9.563595000  | 27.675423000 | 11.990875000 |
| C | 9.799860000  | 28.799779000 | 11.186875000 |
| H | 10.770769000 | 28.833849000 | 10.717050000 |
| C | 9.026483000  | 29.956794000 | 11.059860000 |
| C | 10.740100000 | 26.745505000 | 12.166483000 |
| H | 11.673560000 | 27.298255000 | 12.083275000 |
| H | 10.727971000 | 25.989885000 | 11.379888000 |
| H | 10.713331000 | 26.229030000 | 13.122615000 |
| C | 9.653019000  | 31.130980000 | 10.352729000 |
| H | 9.015643000  | 31.463084000 | 9.532485000  |
| H | 10.632756000 | 30.869370000 | 9.960177000  |
| H | 9.758691000  | 31.980151000 | 11.028403000 |
| C | 8.289730000  | 26.299984000 | 13.484824000 |
| C | 8.200552000  | 25.474871000 | 15.747504000 |
| H | 8.217952000  | 25.647882000 | 16.813619000 |
| C | 8.306288000  | 26.552944000 | 14.873102000 |
| C | 8.468938000  | 27.964583000 | 15.411922000 |
| H | 7.870211000  | 28.617489000 | 14.775958000 |
| C | 9.926915000  | 28.441000000 | 15.337285000 |
| H | 10.296983000 | 28.468711000 | 14.314681000 |
| H | 10.576571000 | 27.782553000 | 15.919196000 |
| H | 10.014377000 | 29.449440000 | 15.746874000 |
| C | 7.943351000  | 28.123376000 | 16.838394000 |
| H | 6.934134000  | 27.724788000 | 16.936965000 |
| H | 7.915271000  | 29.178534000 | 17.109016000 |
| H | 8.585317000  | 27.618329000 | 17.564178000 |
| C | 7.213269000  | 31.387526000 | 11.651677000 |
| C | 6.371721000  | 31.862918000 | 10.633866000 |
| C | 5.844076000  | 33.146964000 | 10.757811000 |
| H | 5.188547000  | 33.523390000 | 9.983830000  |
| C | 6.139566000  | 33.944371000 | 11.850646000 |
| H | 5.726110000  | 34.942963000 | 11.924360000 |
| C | 6.952605000  | 33.451835000 | 12.858495000 |
| H | 7.161842000  | 34.068015000 | 13.723881000 |
| C | 7.491744000  | 32.170015000 | 12.786149000 |
| C | 6.008820000  | 31.016521000 | 9.430517000  |

|   |              |              |              |
|---|--------------|--------------|--------------|
| H | 6.612532000  | 30.112050000 | 9.458022000  |
| C | 6.302104000  | 31.725482000 | 8.103010000  |
| H | 6.102888000  | 31.050545000 | 7.267901000  |
| H | 7.343880000  | 32.046221000 | 8.037331000  |
| H | 5.673578000  | 32.608932000 | 7.971241000  |
| C | 4.538992000  | 30.586534000 | 9.502913000  |
| H | 4.312738000  | 29.874161000 | 8.707754000  |
| H | 3.878765000  | 31.446945000 | 9.395816000  |
| H | 4.309415000  | 30.108886000 | 10.454901000 |
| C | 8.342645000  | 31.655014000 | 13.934054000 |
| H | 8.657928000  | 30.642564000 | 13.688400000 |
| C | 9.611042000  | 32.492847000 | 14.136301000 |
| H | 9.367702000  | 33.518679000 | 14.421660000 |
| H | 10.214132000 | 32.534203000 | 13.227711000 |
| H | 10.227550000 | 32.063338000 | 14.929210000 |
| C | 7.521528000  | 31.579469000 | 15.226409000 |
| H | 6.663233000  | 30.920472000 | 15.098716000 |
| H | 7.149318000  | 32.564028000 | 15.516851000 |
| H | 8.132655000  | 31.198709000 | 16.046883000 |
| C | 3.590171000  | 26.156968000 | 12.682464000 |
| C | 4.545348000  | 25.702129000 | 14.953554000 |
| H | 4.867747000  | 26.741480000 | 14.910682000 |
| C | 2.730094000  | 25.823021000 | 10.362832000 |
| H | 3.109818000  | 26.828001000 | 10.204802000 |
| H | 1.641798000  | 25.837135000 | 10.348271000 |
| H | 4.308152000  | 27.675669000 | 18.547918000 |
| C | 2.193422000  | 30.408216000 | 17.566535000 |
| H | 2.176912000  | 30.191886000 | 18.637464000 |
| H | 1.174682000  | 30.352695000 | 17.189257000 |
| H | 2.534750000  | 31.436337000 | 17.437407000 |
| H | -1.822186000 | 29.484494000 | 9.276132000  |

#### 4a

|   |              |              |              |
|---|--------------|--------------|--------------|
| N | 4.034453000  | 25.589947000 | 13.230430000 |
| N | 3.310950000  | 25.927961000 | 11.225396000 |
| C | 2.498624000  | 25.390436000 | 17.437983000 |
| H | 2.373669000  | 24.324394000 | 17.576776000 |
| C | 3.527785000  | 26.045682000 | 18.091596000 |
| C | 0.485947000  | 25.310499000 | 15.936266000 |
| C | -0.434130000 | 24.645685000 | 16.970197000 |
| H | -1.296001000 | 24.197331000 | 16.472903000 |
| H | -0.799381000 | 25.359579000 | 17.708175000 |
| H | 0.085208000  | 23.852609000 | 17.511529000 |
| C | 1.024977000  | 24.260676000 | 14.958218000 |
| H | 1.630219000  | 24.722011000 | 14.180630000 |
| H | 0.200096000  | 23.742470000 | 14.466929000 |
| H | 1.625946000  | 23.513220000 | 15.481270000 |
| C | 8.149712000  | 24.908326000 | 13.227224000 |
| C | 7.898933000  | 23.888655000 | 14.147618000 |
| H | 7.841675000  | 22.866442000 | 13.796875000 |
| C | 7.752639000  | 24.152949000 | 15.498211000 |
| H | 7.570891000  | 23.344251000 | 16.194531000 |
| C | 8.356102000  | 24.538362000 | 11.767547000 |
| H | 8.565250000  | 25.449235000 | 11.209381000 |

|    |              |              |              |
|----|--------------|--------------|--------------|
| C  | 9.543125000  | 23.577341000 | 11.597221000 |
| H  | 9.757613000  | 23.429709000 | 10.537331000 |
| H  | 9.319457000  | 22.599283000 | 12.027402000 |
| H  | 10.445961000 | 23.947609000 | 12.080397000 |
| C  | 7.097717000  | 23.916492000 | 11.152897000 |
| H  | 7.254991000  | 23.728216000 | 10.089414000 |
| H  | 6.245054000  | 24.582184000 | 11.252101000 |
| H  | 6.859426000  | 22.962510000 | 11.628181000 |
| C  | 3.926636000  | 24.345822000 | 12.630665000 |
| C  | 3.462875000  | 24.561538000 | 11.363944000 |
| H  | 5.595619000  | 25.913143000 | 14.593166000 |
| H  | 4.240193000  | 24.940798000 | 15.195604000 |
| H  | 3.451311000  | 26.217054000 | 9.167665000  |
| C  | 4.278536000  | 23.085946000 | 13.330200000 |
| H  | 4.238762000  | 22.250545000 | 12.634850000 |
| H  | 3.583996000  | 22.877219000 | 14.146469000 |
| H  | 5.285933000  | 23.134819000 | 13.744579000 |
| C  | 3.172297000  | 23.612352000 | 10.261630000 |
| H  | 3.827358000  | 23.786091000 | 9.404765000  |
| H  | 2.139558000  | 23.702893000 | 9.918994000  |
| H  | 3.325317000  | 22.589405000 | 10.597475000 |
| H  | 4.205589000  | 25.492888000 | 18.729428000 |
| Cl | 0.310508000  | 26.809858000 | 12.613974000 |
| Cl | 6.262774000  | 27.242514000 | 10.355616000 |
| Ga | 1.411897000  | 28.421551000 | 13.695770000 |
| Ga | 6.914986000  | 28.358542000 | 12.177115000 |
| P  | 3.519173000  | 28.345638000 | 12.640549000 |
| P  | 5.239296000  | 29.052071000 | 13.678637000 |
| N  | 0.495884000  | 30.100311000 | 13.371416000 |
| N  | 0.945363000  | 28.219527000 | 15.571943000 |
| N  | 8.462947000  | 27.320710000 | 12.810283000 |
| N  | 7.912892000  | 29.920481000 | 11.582442000 |
| C  | -0.572490000 | 30.396689000 | 14.107765000 |
| C  | -0.948257000 | 29.681138000 | 15.253832000 |
| H  | -1.876139000 | 29.993040000 | 15.707185000 |
| C  | -0.216955000 | 28.739195000 | 15.980453000 |
| C  | -1.443137000 | 31.559555000 | 13.717772000 |
| H  | -2.156286000 | 31.236245000 | 12.957057000 |
| H  | -0.861680000 | 32.372970000 | 13.290715000 |
| H  | -2.004180000 | 31.924685000 | 14.574233000 |
| C  | -0.808253000 | 28.291714000 | 17.290414000 |
| H  | -1.450879000 | 27.428375000 | 17.103463000 |
| H  | -1.421250000 | 29.076403000 | 17.727221000 |
| H  | -0.049236000 | 27.986569000 | 18.005182000 |
| C  | 0.936238000  | 30.967629000 | 12.309705000 |
| C  | 0.349782000  | 30.888889000 | 11.038156000 |
| C  | 0.818705000  | 31.751662000 | 10.046326000 |
| H  | 0.376497000  | 31.713185000 | 9.059582000  |
| C  | 1.836216000  | 32.652705000 | 10.301534000 |
| H  | 2.182658000  | 33.315717000 | 9.519041000  |
| C  | 2.421485000  | 32.698817000 | 11.558096000 |
| H  | 3.232589000  | 33.387761000 | 11.737499000 |
| C  | 1.989573000  | 31.862107000 | 12.582906000 |
| C  | -0.748996000 | 29.899366000 | 10.695615000 |
| H  | -1.031052000 | 29.369229000 | 11.604548000 |



|   |              |              |              |
|---|--------------|--------------|--------------|
| C | -2.000894000 | 30.590723000 | 10.139660000 |
| H | -1.804589000 | 31.046598000 | 9.167728000  |
| H | -2.360554000 | 31.378569000 | 10.802321000 |
| C | -0.232956000 | 28.850318000 | 9.702673000  |
| H | 0.035180000  | 29.311811000 | 8.750098000  |
| H | -0.996652000 | 28.093896000 | 9.513137000  |
| H | 0.646185000  | 28.349323000 | 10.100451000 |
| C | 2.630844000  | 31.933450000 | 13.958943000 |
| H | 2.708879000  | 30.909730000 | 14.334500000 |
| C | 1.774440000  | 32.723695000 | 14.959178000 |
| H | 0.807599000  | 32.260364000 | 15.143794000 |
| H | 1.601995000  | 33.737376000 | 14.591995000 |
| H | 2.291138000  | 32.798034000 | 15.917675000 |
| C | 4.045431000  | 32.503723000 | 13.932067000 |
| H | 4.044789000  | 33.571516000 | 13.708719000 |
| H | 4.669548000  | 32.004732000 | 13.194884000 |
| H | 4.513974000  | 32.377464000 | 14.907291000 |
| C | 1.787748000  | 27.462474000 | 16.457146000 |
| C | 1.611399000  | 26.077586000 | 16.607989000 |
| C | 3.676878000  | 27.417592000 | 17.944593000 |
| C | 2.811123000  | 28.153436000 | 17.139282000 |
| H | -0.107027000 | 26.014066000 | 15.354845000 |
| C | 2.917684000  | 29.668471000 | 17.075090000 |
| H | 2.512726000  | 29.985000000 | 16.114767000 |
| C | 4.350374000  | 30.191803000 | 17.167277000 |
| H | 4.787665000  | 30.014058000 | 18.151143000 |
| H | 4.358890000  | 31.269884000 | 17.003027000 |
| H | 4.989796000  | 29.733754000 | 16.416462000 |
| C | 9.669382000  | 27.579086000 | 12.311694000 |
| C | 9.954716000  | 28.654186000 | 11.457770000 |
| H | 10.962198000 | 28.675782000 | 11.071951000 |
| C | 9.178060000  | 29.778818000 | 11.178627000 |
| C | 10.842813000 | 26.700778000 | 12.661801000 |
| H | 11.728321000 | 27.312111000 | 12.826059000 |
| H | 11.057462000 | 26.033940000 | 11.825215000 |
| H | 10.660999000 | 26.092031000 | 13.542151000 |
| C | 9.823261000  | 30.895338000 | 10.403198000 |
| H | 9.290752000  | 31.042767000 | 9.461949000  |
| H | 10.863552000 | 30.667991000 | 10.186993000 |
| H | 9.770177000  | 31.839727000 | 10.942200000 |
| C | 8.242329000  | 26.225772000 | 13.712071000 |
| C | 7.851846000  | 25.457488000 | 15.959460000 |
| H | 7.741038000  | 25.653846000 | 17.015910000 |
| C | 8.092904000  | 26.513955000 | 15.084262000 |
| C | 8.242817000  | 27.931669000 | 15.610616000 |
| H | 7.845830000  | 28.607509000 | 14.851932000 |
| C | 9.721624000  | 28.296233000 | 15.806147000 |
| H | 10.278663000 | 28.235331000 | 14.873240000 |
| H | 10.190556000 | 27.622865000 | 16.526421000 |
| H | 9.814335000  | 29.315915000 | 16.184176000 |
| C | 7.454179000  | 28.184717000 | 16.894902000 |
| H | 6.417392000  | 27.862950000 | 16.797286000 |
| H | 7.456127000  | 29.249425000 | 17.126556000 |
| H | 7.893067000  | 27.665899000 | 17.749167000 |
| C | 7.323871000  | 31.232899000 | 11.589678000 |

|   |              |              |              |
|---|--------------|--------------|--------------|
| C | 6.525094000  | 31.662584000 | 10.519410000 |
| C | 6.032397000  | 32.967133000 | 10.550461000 |
| H | 5.420254000  | 33.320082000 | 9.731061000  |
| C | 6.328946000  | 33.822428000 | 11.598339000 |
| H | 5.953543000  | 34.837866000 | 11.593984000 |
| C | 7.095563000  | 33.370815000 | 12.661434000 |
| H | 7.303828000  | 34.037761000 | 13.487817000 |
| C | 7.592952000  | 32.070979000 | 12.688582000 |
| C | 6.197047000  | 30.764281000 | 9.341807000  |
| H | 6.769869000  | 29.844986000 | 9.448410000  |
| C | 6.591295000  | 31.397443000 | 8.001645000  |
| H | 6.430386000  | 30.686741000 | 7.188990000  |
| H | 7.641874000  | 31.692182000 | 7.990063000  |
| H | 5.996886000  | 32.287020000 | 7.785037000  |
| C | 4.711708000  | 30.382666000 | 9.345413000  |
| H | 4.502909000  | 29.671464000 | 8.543792000  |
| H | 4.078974000  | 31.258865000 | 9.198296000  |
| H | 4.420172000  | 29.925285000 | 10.290619000 |
| C | 8.412769000  | 31.606556000 | 13.882666000 |
| H | 8.632903000  | 30.548507000 | 13.747063000 |
| C | 9.756804000  | 32.341369000 | 13.973176000 |
| H | 9.611007000  | 33.415964000 | 14.098384000 |
| H | 10.358496000 | 32.187794000 | 13.077409000 |
| H | 10.331464000 | 31.979550000 | 14.828040000 |
| C | 7.630010000  | 31.746065000 | 15.193261000 |
| H | 6.695188000  | 31.187952000 | 15.155270000 |
| H | 7.388610000  | 32.788593000 | 15.406461000 |
| H | 8.222185000  | 31.367837000 | 16.028650000 |
| C | 3.652653000  | 26.555011000 | 12.366348000 |
| C | 4.515188000  | 25.796806000 | 14.590642000 |
| H | 4.054116000  | 26.682884000 | 15.011659000 |
| C | 2.857371000  | 26.575317000 | 10.005168000 |
| H | 3.001153000  | 27.646028000 | 10.106594000 |
| H | 1.802718000  | 26.359803000 | 9.845820000  |
| H | 4.467612000  | 27.924303000 | 18.479138000 |
| C | 2.053998000  | 30.319166000 | 18.167194000 |
| H | 2.377625000  | 29.990256000 | 19.156905000 |
| H | 0.999796000  | 30.072608000 | 18.059178000 |
| H | 2.146923000  | 31.405590000 | 18.123374000 |
| H | -2.804636000 | 29.864467000 | 10.006447000 |

#### 4b

|   |              |              |              |
|---|--------------|--------------|--------------|
| N | 4.013120000  | 25.555661000 | 13.182982000 |
| N | 3.258340000  | 25.871841000 | 11.185080000 |
| C | 2.570124000  | 25.423357000 | 17.444617000 |
| H | 2.461721000  | 24.357391000 | 17.596911000 |
| C | 3.598002000  | 26.099457000 | 18.077785000 |
| C | 0.534662000  | 25.295119000 | 15.983031000 |
| C | -0.360651000 | 24.643134000 | 17.046608000 |
| H | -1.225133000 | 24.173861000 | 16.573684000 |
| H | -0.722235000 | 25.369426000 | 17.774128000 |
| H | 0.176602000  | 23.868487000 | 17.597050000 |
| C | 1.069198000  | 24.229249000 | 15.020227000 |
| H | 1.656599000  | 24.679253000 | 14.222393000 |

|    |              |              |              |
|----|--------------|--------------|--------------|
| H  | 0.242689000  | 23.691265000 | 14.553736000 |
| H  | 1.687378000  | 23.500624000 | 15.549727000 |
| C  | 8.142207000  | 24.899664000 | 13.252229000 |
| C  | 7.887863000  | 23.893676000 | 14.186832000 |
| H  | 7.841989000  | 22.865667000 | 13.851797000 |
| C  | 7.724307000  | 24.177996000 | 15.530975000 |
| H  | 7.539312000  | 23.379384000 | 16.237981000 |
| C  | 8.369499000  | 24.501232000 | 11.803452000 |
| H  | 8.561928000  | 25.403550000 | 11.225655000 |
| C  | 9.577681000  | 23.561035000 | 11.664968000 |
| H  | 9.805156000  | 23.395496000 | 10.610441000 |
| H  | 9.367726000  | 22.588143000 | 12.113371000 |
| H  | 10.468766000 | 23.957201000 | 12.148745000 |
| C  | 7.132214000  | 23.833263000 | 11.193589000 |
| H  | 7.299742000  | 23.633052000 | 10.133991000 |
| H  | 6.258837000  | 24.474026000 | 11.277393000 |
| H  | 6.918970000  | 22.880390000 | 11.682717000 |
| C  | 3.911264000  | 24.306433000 | 12.592852000 |
| C  | 3.428741000  | 24.508475000 | 11.330576000 |
| H  | 5.583233000  | 25.932617000 | 14.522554000 |
| H  | 4.273711000  | 24.911855000 | 15.143659000 |
| H  | 3.346387000  | 26.133198000 | 9.120846000  |
| C  | 4.281773000  | 23.054118000 | 13.296777000 |
| H  | 4.254030000  | 22.216101000 | 12.604034000 |
| H  | 3.590429000  | 22.838172000 | 14.113964000 |
| H  | 5.288457000  | 23.118561000 | 13.710336000 |
| C  | 3.134873000  | 23.548193000 | 10.238777000 |
| H  | 3.777767000  | 23.723064000 | 9.372978000  |
| H  | 2.097063000  | 23.624970000 | 9.908457000  |
| H  | 3.303308000  | 22.529443000 | 10.579975000 |
| H  | 4.292758000  | 25.563394000 | 18.711627000 |
| Br | 0.108126000  | 26.711345000 | 12.560495000 |
| Br | 6.279969000  | 27.178385000 | 10.155645000 |
| Ga | 1.385649000  | 28.397794000 | 13.668229000 |
| Ga | 6.897531000  | 28.347275000 | 12.142613000 |
| P  | 3.473995000  | 28.303880000 | 12.574722000 |
| P  | 5.189056000  | 29.023222000 | 13.618838000 |
| N  | 0.494275000  | 30.094498000 | 13.355485000 |
| N  | 0.959165000  | 28.210743000 | 15.558109000 |
| N  | 8.440777000  | 27.311625000 | 12.801551000 |
| N  | 7.900507000  | 29.922818000 | 11.586940000 |
| C  | -0.569007000 | 30.388817000 | 14.100037000 |
| C  | -0.939824000 | 29.667037000 | 15.244710000 |
| H  | -1.867314000 | 29.975709000 | 15.701089000 |
| C  | -0.202481000 | 28.729666000 | 15.971189000 |
| C  | -1.440275000 | 31.555355000 | 13.723069000 |
| H  | -2.160521000 | 31.235579000 | 12.967600000 |
| H  | -0.861147000 | 32.369329000 | 13.294041000 |
| H  | -1.993130000 | 31.918027000 | 14.585853000 |
| C  | -0.785869000 | 28.284755000 | 17.285351000 |
| H  | -1.425012000 | 27.417578000 | 17.103642000 |
| H  | -1.400690000 | 29.067777000 | 17.722490000 |
| H  | -0.022250000 | 27.985570000 | 17.997748000 |
| C  | 0.931747000  | 30.969812000 | 12.297724000 |
| C  | 0.337541000  | 30.907753000 | 11.028353000 |

|   |              |              |              |
|---|--------------|--------------|--------------|
| C | 0.798376000  | 31.784442000 | 10.044932000 |
| H | 0.349099000  | 31.757560000 | 9.061061000  |
| C | 1.815722000  | 32.683914000 | 10.304096000 |
| H | 2.155097000  | 33.358152000 | 9.528144000  |
| C | 2.410034000  | 32.712933000 | 11.556651000 |
| H | 3.221370000  | 33.400630000 | 11.739502000 |
| C | 1.986901000  | 31.861856000 | 12.573328000 |
| C | -0.760525000 | 29.922277000 | 10.674009000 |
| H | -1.031403000 | 29.369509000 | 11.572638000 |
| C | -2.020952000 | 30.619253000 | 10.145156000 |
| H | -1.835276000 | 31.099773000 | 9.183054000  |
| H | -2.380032000 | 31.388537000 | 10.829394000 |
| C | -0.248392000 | 28.900400000 | 9.650778000  |
| H | -0.002690000 | 29.384222000 | 8.703333000  |
| H | -1.005069000 | 28.137655000 | 9.459293000  |
| H | 0.644976000  | 28.403469000 | 10.021763000 |
| C | 2.640061000  | 31.918225000 | 13.944161000 |
| H | 2.724505000  | 30.890205000 | 14.305770000 |
| C | 1.790380000  | 32.694548000 | 14.960716000 |
| H | 0.825826000  | 32.227260000 | 15.147212000 |
| H | 1.613237000  | 33.712228000 | 14.607123000 |
| H | 2.314107000  | 32.758359000 | 15.916034000 |
| C | 4.052577000  | 32.493302000 | 13.910284000 |
| H | 4.046737000  | 33.562233000 | 13.693096000 |
| H | 4.672733000  | 32.000780000 | 13.165392000 |
| H | 4.529388000  | 32.364363000 | 14.880790000 |
| C | 1.817505000  | 27.473711000 | 16.446422000 |
| C | 1.661510000  | 26.088565000 | 16.619747000 |
| C | 3.721082000  | 27.472164000 | 17.917894000 |
| C | 2.835875000  | 28.186236000 | 17.114452000 |
| H | -0.076526000 | 25.979406000 | 15.397703000 |
| C | 2.916629000  | 29.702161000 | 17.043995000 |
| H | 2.492935000  | 30.010001000 | 16.089464000 |
| C | 4.341954000  | 30.248012000 | 17.114911000 |
| H | 4.795632000  | 30.082025000 | 18.093354000 |
| H | 4.331240000  | 31.325238000 | 16.946283000 |
| H | 4.978207000  | 29.795529000 | 16.358033000 |
| C | 9.648195000  | 27.571322000 | 12.306045000 |
| C | 9.933960000  | 28.644399000 | 11.449164000 |
| H | 10.940777000 | 28.662416000 | 11.061359000 |
| C | 9.164739000  | 29.776289000 | 11.180244000 |
| C | 10.824625000 | 26.700757000 | 12.664923000 |
| H | 11.703762000 | 27.318499000 | 12.839237000 |
| H | 11.052160000 | 26.038595000 | 11.828117000 |
| H | 10.639445000 | 26.088578000 | 13.542070000 |
| C | 9.816688000  | 30.895170000 | 10.414132000 |
| H | 9.283807000  | 31.053925000 | 9.474921000  |
| H | 10.855139000 | 30.662685000 | 10.194604000 |
| H | 9.770605000  | 31.835136000 | 10.961499000 |
| C | 8.220676000  | 26.226157000 | 13.715951000 |
| C | 7.812492000  | 25.490035000 | 15.972028000 |
| H | 7.690062000  | 25.702595000 | 17.023914000 |
| C | 8.058500000  | 26.533513000 | 15.082867000 |
| C | 8.203878000  | 27.958097000 | 15.591373000 |
| H | 7.799676000  | 28.623969000 | 14.827474000 |

|   |              |              |              |
|---|--------------|--------------|--------------|
| C | 9.682434000  | 28.329748000 | 15.775808000 |
| H | 10.235191000 | 28.264543000 | 14.840807000 |
| H | 10.157149000 | 27.662813000 | 16.498235000 |
| H | 9.773790000  | 29.351952000 | 16.146670000 |
| C | 7.421864000  | 28.221464000 | 16.877373000 |
| H | 6.387452000  | 27.889966000 | 16.790352000 |
| H | 7.416796000  | 29.288696000 | 17.095398000 |
| H | 7.870611000  | 27.716786000 | 17.735004000 |
| C | 7.325996000  | 31.241962000 | 11.613942000 |
| C | 6.541647000  | 31.703828000 | 10.546204000 |
| C | 6.068612000  | 33.015027000 | 10.597533000 |
| H | 5.467841000  | 33.391502000 | 9.780223000  |
| C | 6.372413000  | 33.847935000 | 11.661073000 |
| H | 6.012760000  | 34.868975000 | 11.672067000 |
| C | 7.126637000  | 33.366291000 | 12.719608000 |
| H | 7.342291000  | 34.016293000 | 13.557465000 |
| C | 7.603012000  | 32.058338000 | 12.727078000 |
| C | 6.208485000  | 30.834330000 | 9.349466000  |
| H | 6.778323000  | 29.911028000 | 9.434252000  |
| C | 6.603093000  | 31.493842000 | 8.022193000  |
| H | 6.444770000  | 30.797736000 | 7.196564000  |
| H | 7.653017000  | 31.791166000 | 8.017435000  |
| H | 6.006747000  | 32.385644000 | 7.820914000  |
| C | 4.721629000  | 30.458903000 | 9.347229000  |
| H | 4.508548000  | 29.764769000 | 8.532059000  |
| H | 4.093411000  | 31.341219000 | 9.218743000  |
| H | 4.428036000  | 29.982613000 | 10.282395000 |
| C | 8.412127000  | 31.563241000 | 13.915541000 |
| H | 8.607863000  | 30.502014000 | 13.768847000 |
| C | 9.773112000  | 32.265285000 | 14.012654000 |
| H | 9.652851000  | 33.341296000 | 14.152016000 |
| H | 10.369224000 | 32.109069000 | 13.113606000 |
| H | 10.340540000 | 31.878415000 | 14.861364000 |
| C | 7.632128000  | 31.707759000 | 15.226677000 |
| H | 6.691152000  | 31.160220000 | 15.186978000 |
| H | 7.402416000  | 32.751995000 | 15.443687000 |
| H | 8.219933000  | 31.320618000 | 16.060770000 |
| C | 3.609975000  | 26.510784000 | 12.317149000 |
| C | 4.507849000  | 25.778020000 | 14.536165000 |
| H | 4.021753000  | 26.646308000 | 14.966191000 |
| C | 2.774700000  | 26.504104000 | 9.968038000  |
| H | 2.923177000  | 27.575889000 | 10.050992000 |
| H | 1.715547000  | 26.289417000 | 9.839824000  |
| H | 4.507216000  | 27.997144000 | 18.441162000 |
| C | 2.059057000  | 30.340689000 | 18.147990000 |
| H | 2.403025000  | 30.019133000 | 19.133247000 |
| H | 1.007653000  | 30.076312000 | 18.056314000 |
| H | 2.133286000  | 31.428387000 | 18.100990000 |
| H | -2.821287000 | 29.891326000 | 10.001067000 |

## 7. References

- [1] M. K. Sharma, C. Wölper, G. Haberhauer and S. Schulz, *Angew. Chem., Int. Ed.* 2021, **60**, 6784; *Angew. Chem.* 2021, **133**, 6859.
- [2] A. J. Arduengo III, H. V. R. Dias, R. L. Harlow and M. Kline, *J. Am. Chem. Soc.* 1992, **114**, 5530.
- [3] A. R. O'Connor, C. Nataro, J. A. Golen and A. L. Rheingold, *J. Organomet. Chem.* 2004, **689**, 2411.
- [4] G. R. Fulmer, A. J. M. Miller, N. H. Sherden, H. E. Gottlieb, A. Nudelman, B. M. Stoltz, J. E. Bercaw and K. I. Goldberg, *Organometallics* 2010, **29**, 2176.
- [5] G. M. Sheldrick, *Acta Crystallogr. Sect. A* 1990, **A46**, 467.
- [6] G. M. Sheldrick, SHELXL-2017, Program for the Refinement of Crystal Structures University of Göttingen, Göttingen (Germany), 2017. See also: G. M. Sheldrick "Crystal structure refinement with SHELXL", *Acta Crystallogr.* 2015, **C71**, 3.
- [7] G. M. Sheldrick, *Acta Crystallogr., Sect. A* 2008, **A64**, 112.
- [8] C. B. Hübschle, G. M. Sheldrick and B. Dittrich, *J. Appl. Crystallogr.* 2011, **44**, 1281.
- [9] D. A. Pantazis, X. Y. Chen, C. R. Landis and F. Neese, *J. Chem. Theory Comput.* 2008, **4**, 908.
- [10] D. A. Pantazis and F. Neese, *J. Chem. Theory Comput.* 2009, **5**, 2229.
- [11] D. A. Pantazis and F. Neese, *J. Chem. Theory Comput.* 2011, **7**, 677.
- [12] D. A. Pantazis and F. Neese, *Theor. Chem. Acc.* 2012, 131.
- [13] P. J. Stephens, F. J. Devlin, C. F. Chabalowski and M. J. Frisch, *J. Phys. Chem.* 1994, **98**, 11623.
- [14] A. D. Becke, *J. Chem. Phys.* 1993, **98**, 5648.
- [15] C. T. Lee, W. T. Yang and R. G. Parr, *Phys. Rev. B* 1988, **37**, 785.
- [16] S. H. Vosko, L. Wilk and M. Nusair, *Can. J. Phys.* 1980, **58**, 1200.
- [17] F. Weigend, R. Ahlrichs, *Phys. Chem. Chem. Phys.* 2005, **7**, 3297.
- [18] S. Grimme, J. Antony, S. Ehrlich and H. Krieg, *J. Chem. Phys.* 2010, 132.
- [19] S. Grimme, S. Ehrlich and L. Goerigk, *J. Comp. Chem.* 2011, **32**, 1456.
- [20] NBO 7.0. E. D. Glendening, J. K. Badenhoop, A. E. Reed, J. E. Carpenter, J. A. Bohmann, C. M. Morales, P. Karafiloglou, C. R. Landis, and F. Weinhold, Theoretical Chemistry Institute, University of Wisconsin, Madison, WI (2018).
- [21] E. Reijerse, F. Lendzian, R. Isaacson, W. Lubitz, *J. Magn. Reson.* 2012, **214**, 237.
- [22] S. Stefan and S. Arthur, EasySpin, a comprehensive software package for spectral simulation and analysis in EPR *J. Magn. Reson.* 2006, **178**, 42.
